# Supplementary material
Source: PubMed Central journal article supplement (PMC3419814)

# Electronic Supporting Information for

## *Click-based Synthesis of Triazolobithiazole $\Delta F508$ - CFTR Correctors for Cystic Fibrosis*

Michael B. Donald,<sup>†</sup> Kevin X. Rodriguez,<sup>†</sup> Hannah Shay,<sup>†</sup> Puay-Wah Phuan,<sup>§</sup> A.S. Verkman,<sup>§</sup>  
and Mark J. Kurth<sup>†\*</sup>

<sup>†</sup>*Department of Chemistry, University of California, One Shields Avenue, Davis,  
California 95616*

<sup>§</sup>*Departments of Medicine and Physiology, University of California, San Francisco,  
California, 94143-0521*

### **Table of Contents**

|                                                                            |     |
|----------------------------------------------------------------------------|-----|
| <sup>1</sup> H and <sup>13</sup> C NMR Spectra for Compounds 3a - 15 ..... | S2  |
| High Resolution Mass Spectrometry Spectra for Compounds 3a - 15 .....      | S27 |

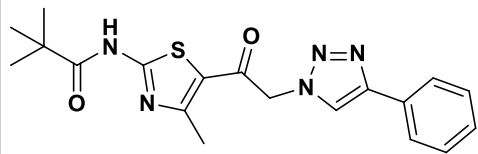

3a

14 13 12 11 10 9 8 7 6 5 4 3 2 1 0 -1 -2  
f1 (ppm)

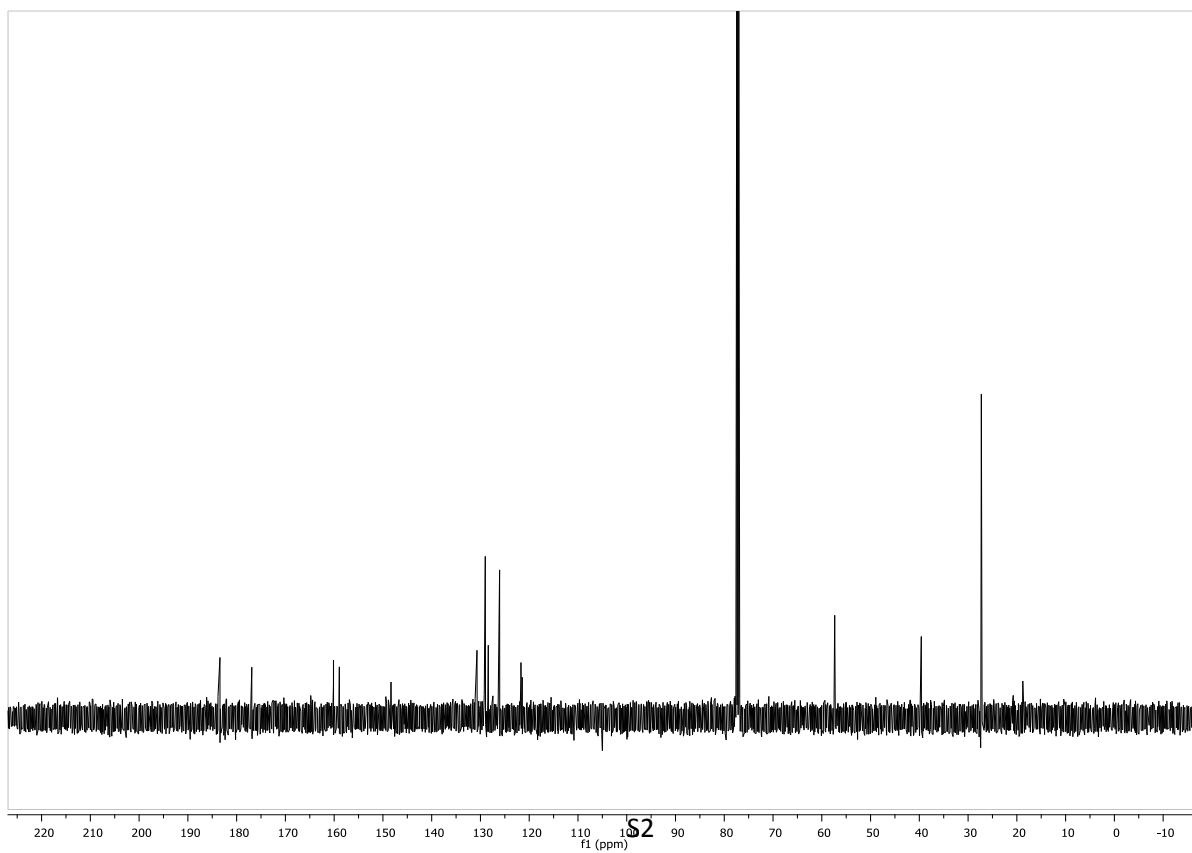

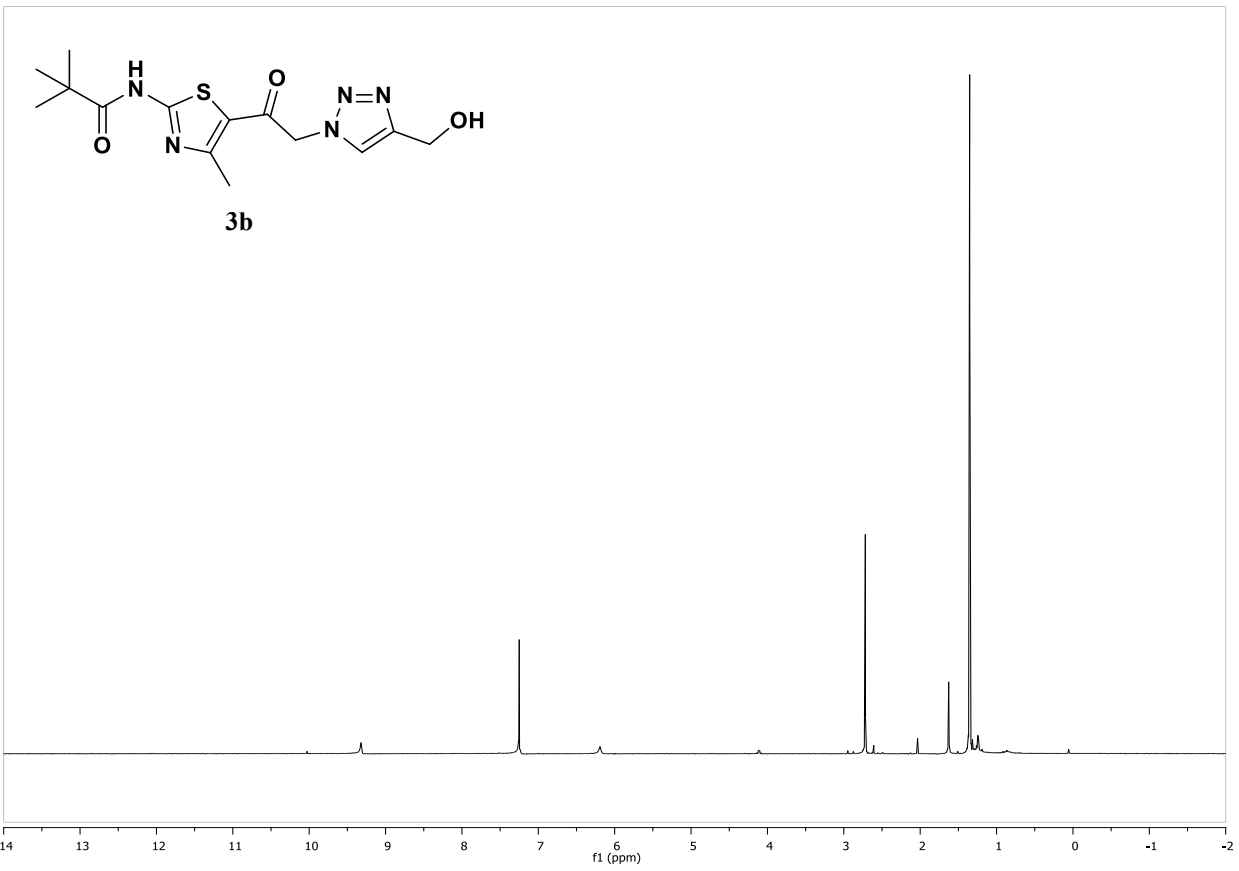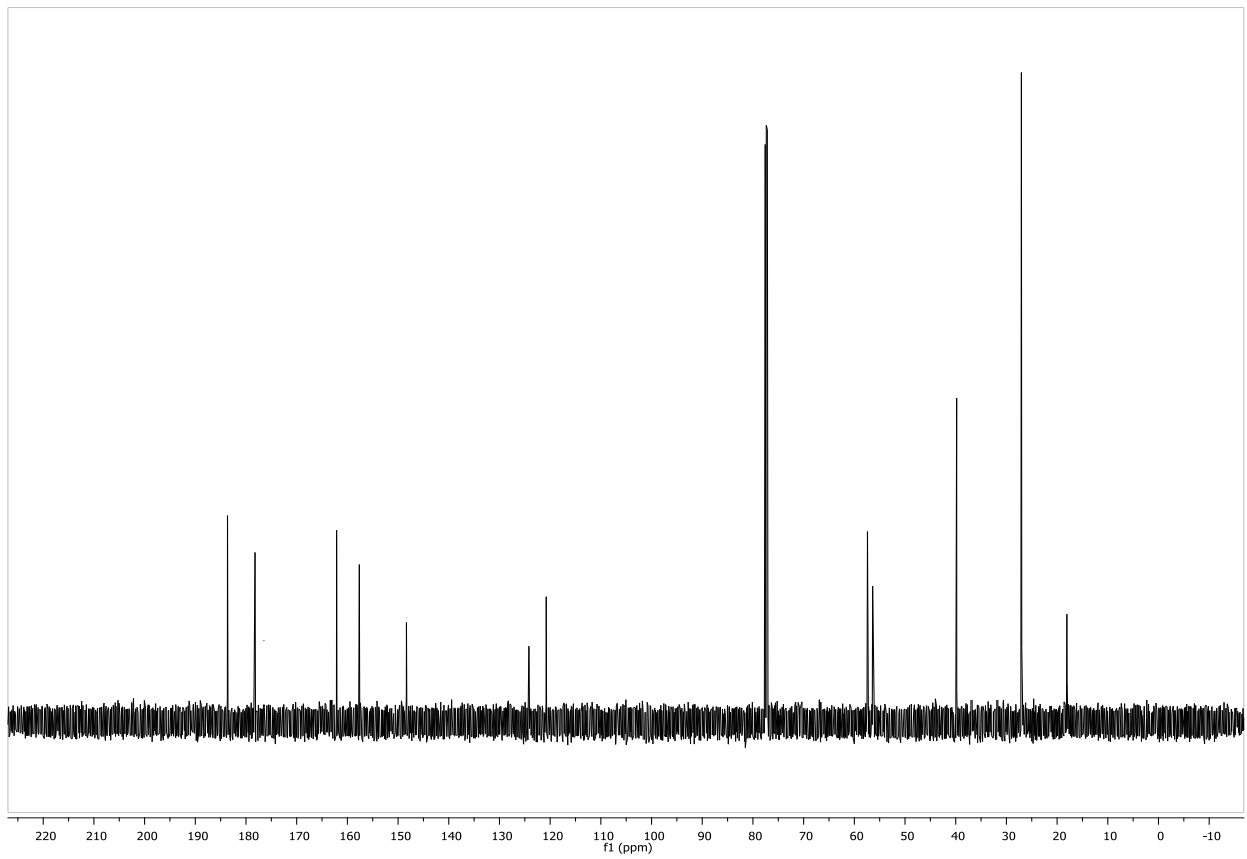

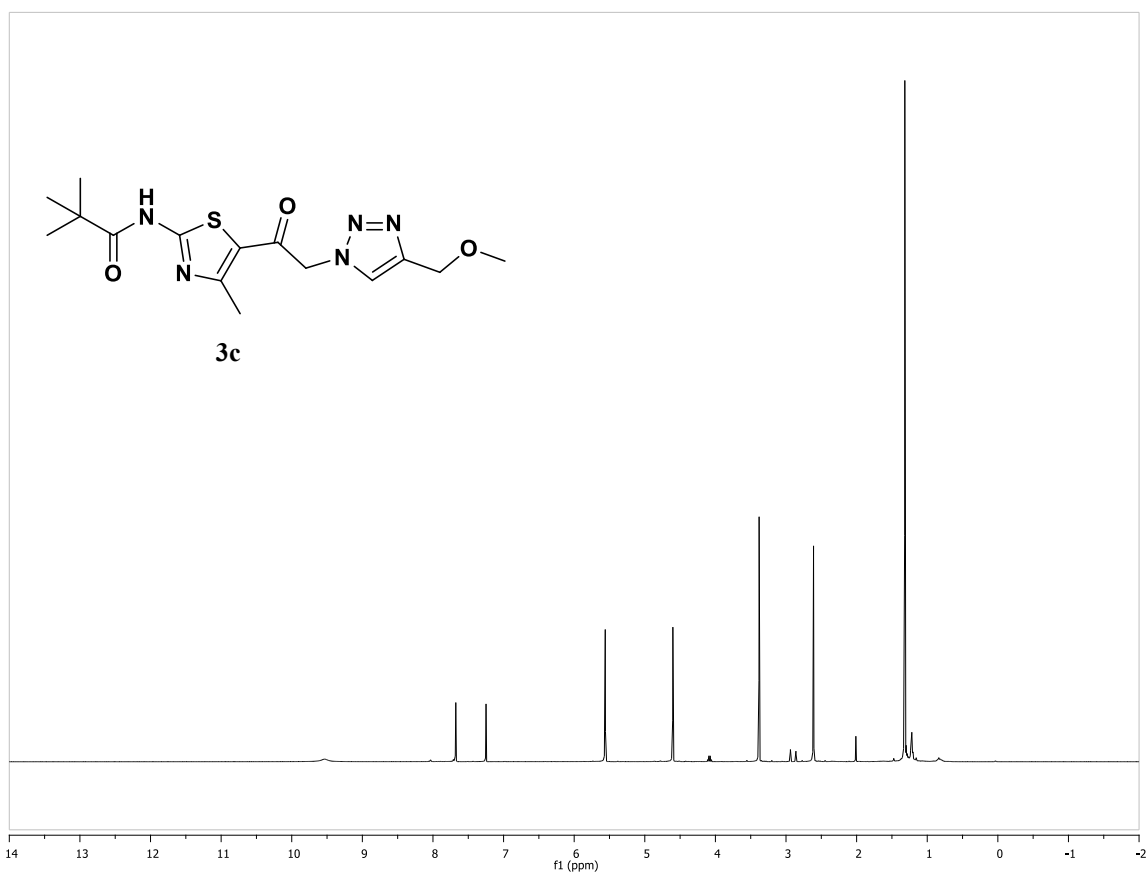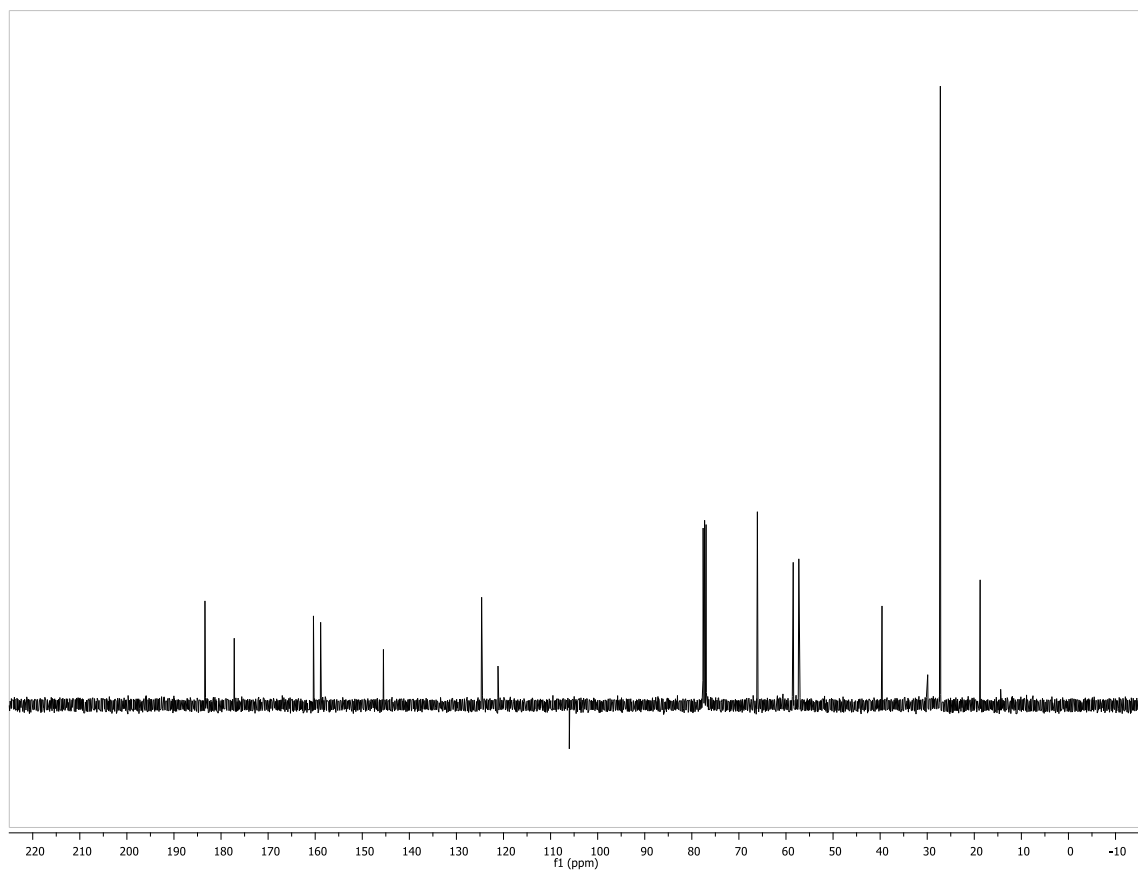

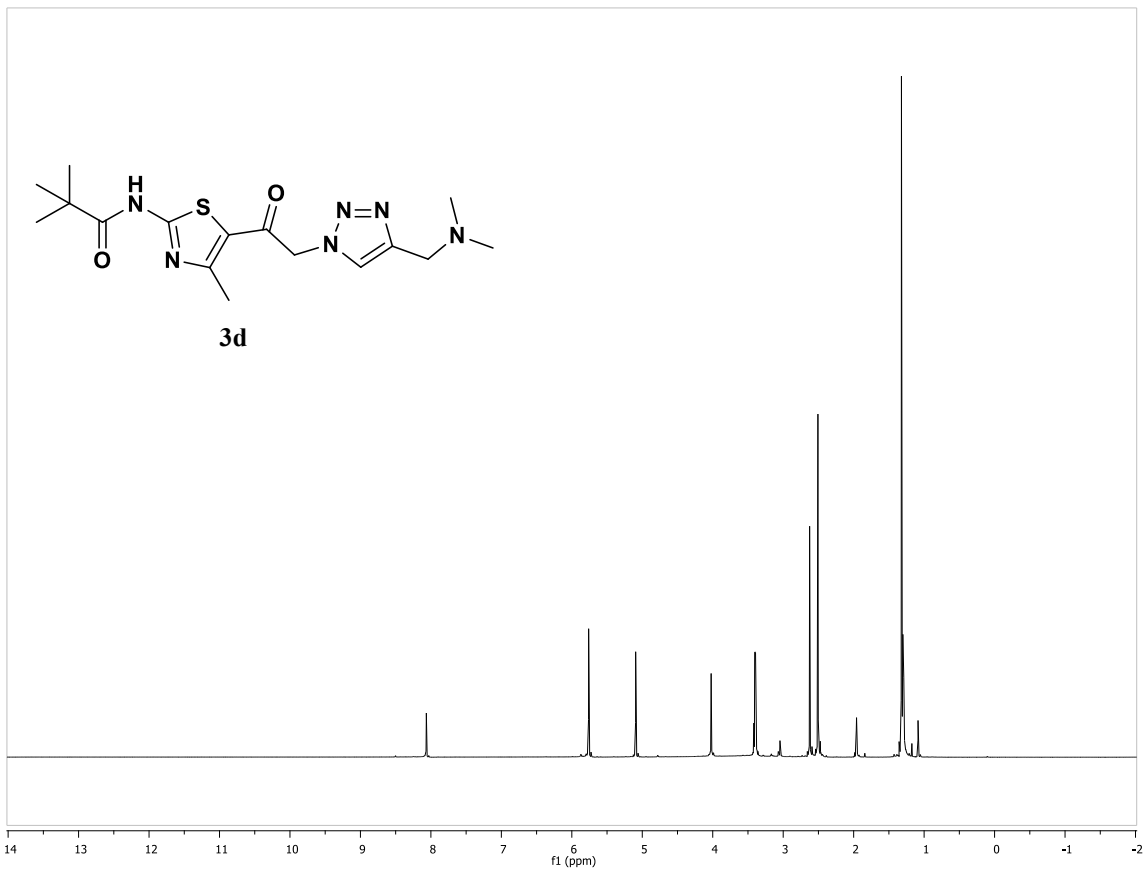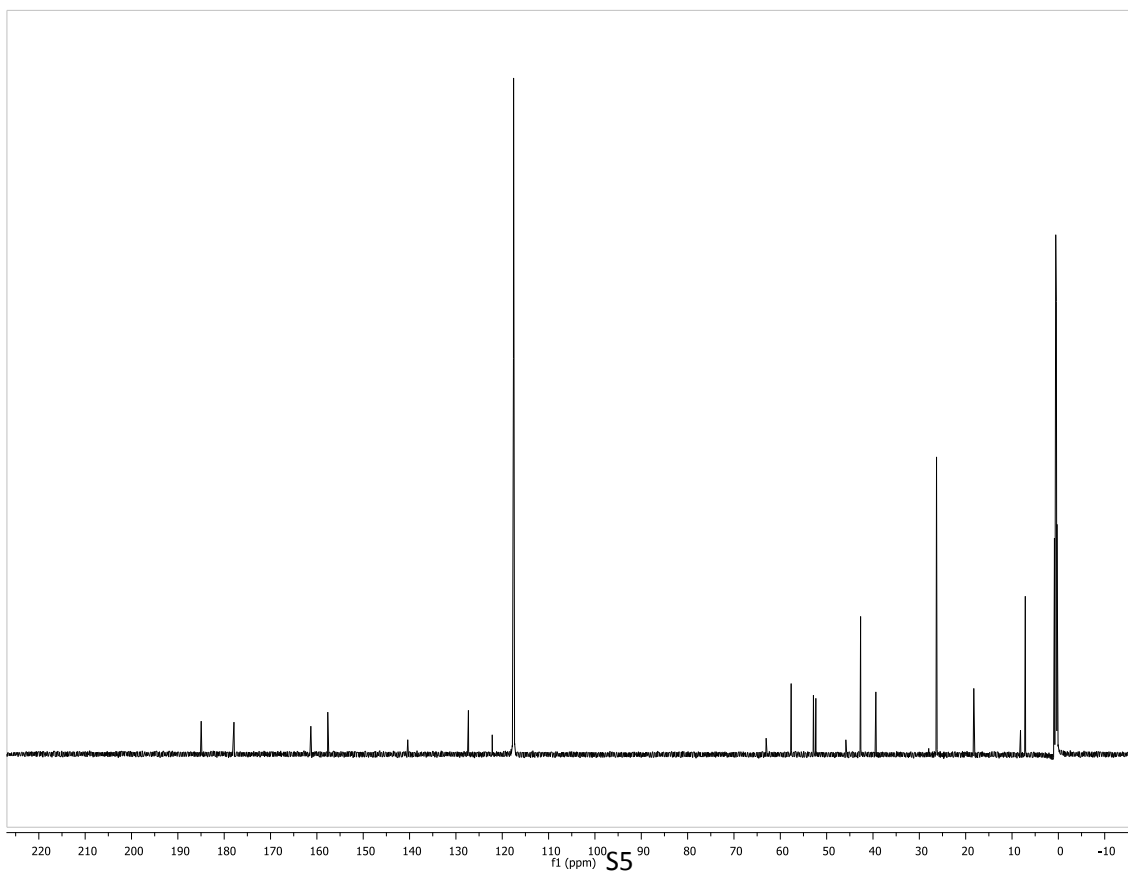

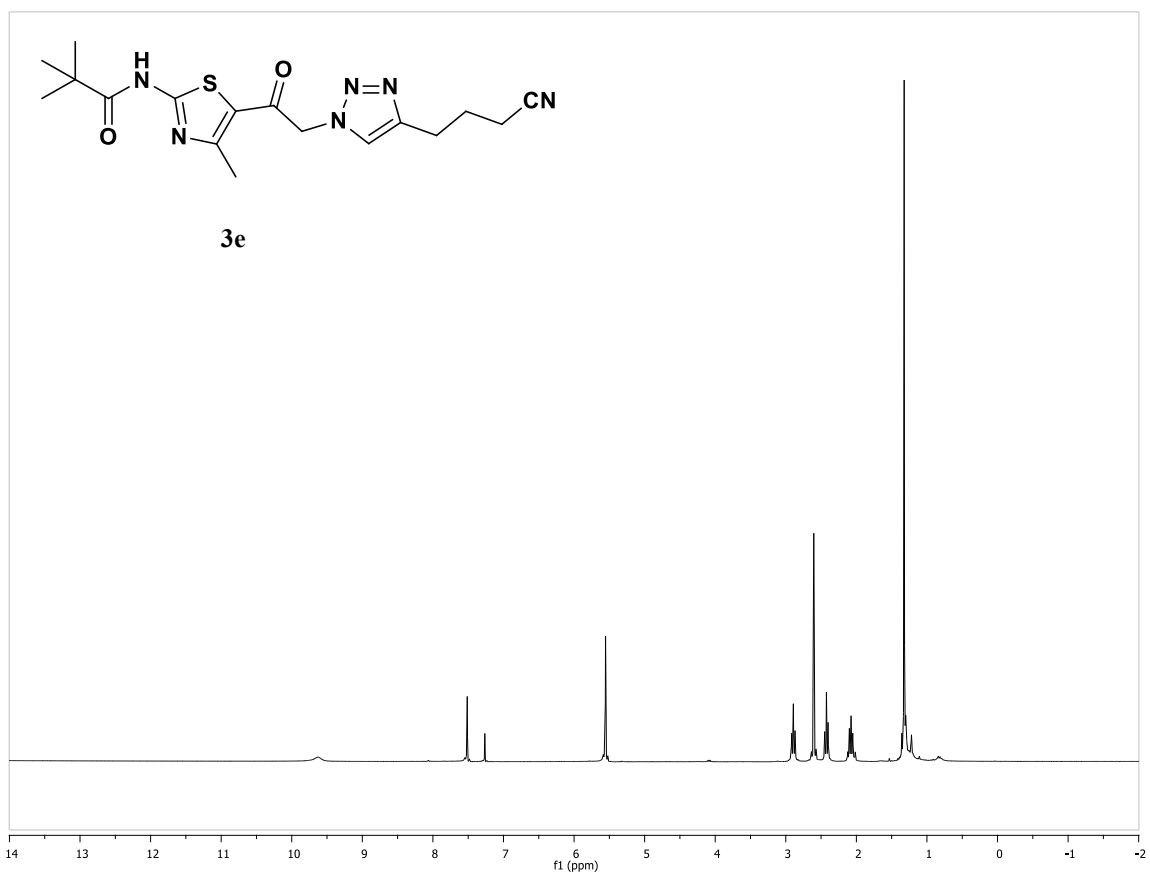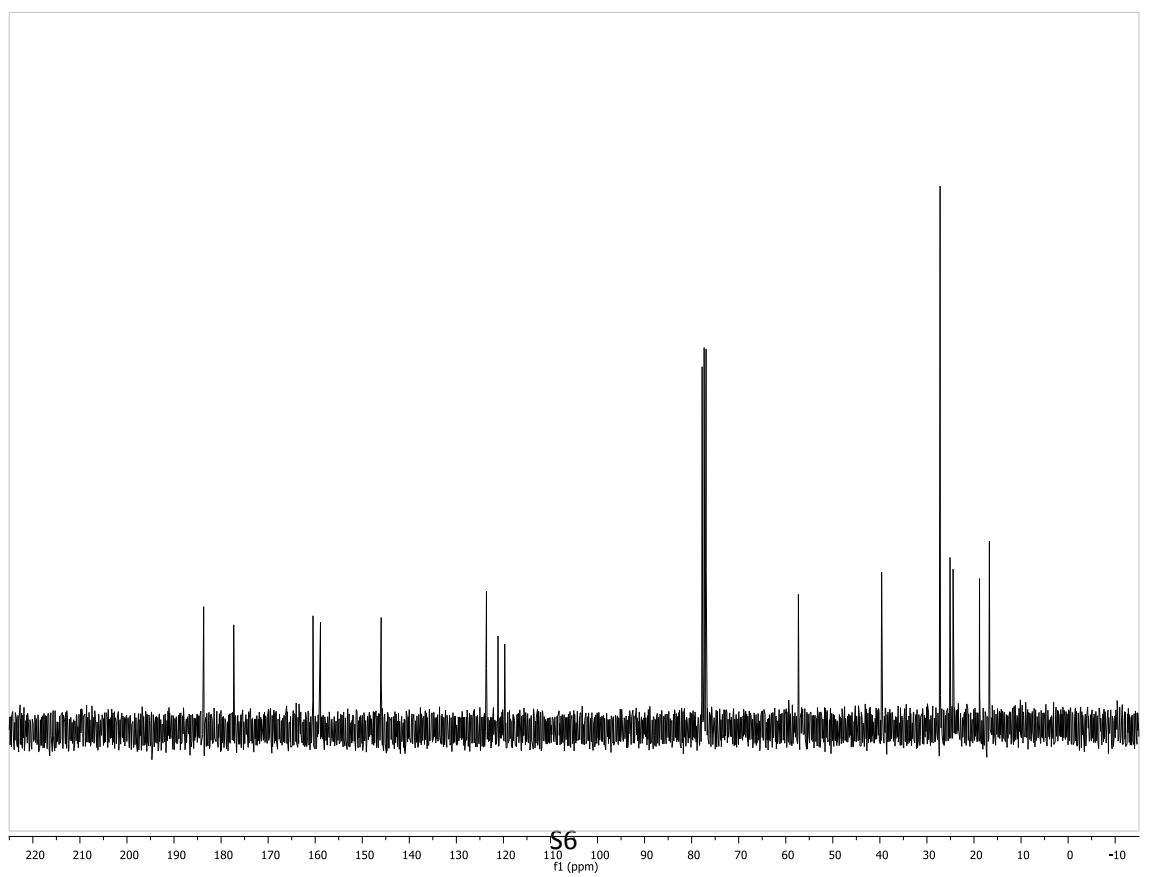

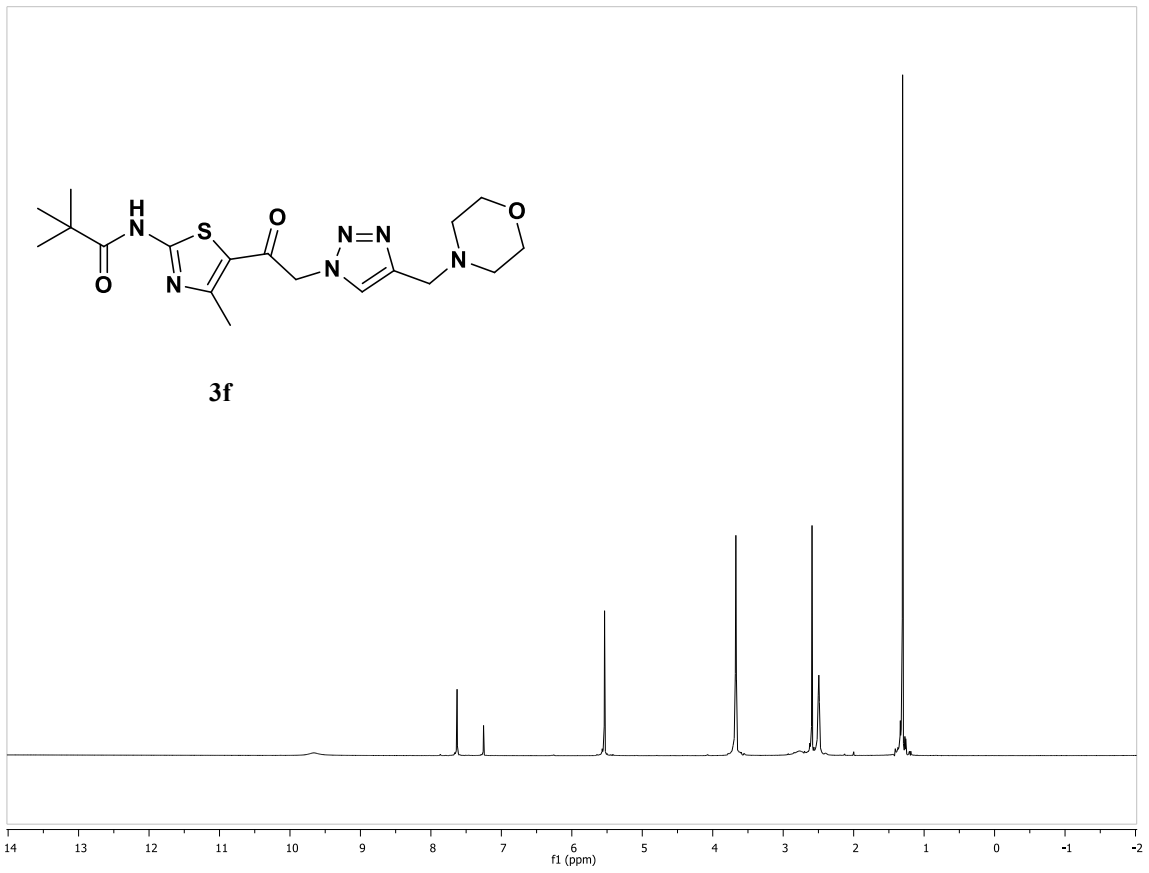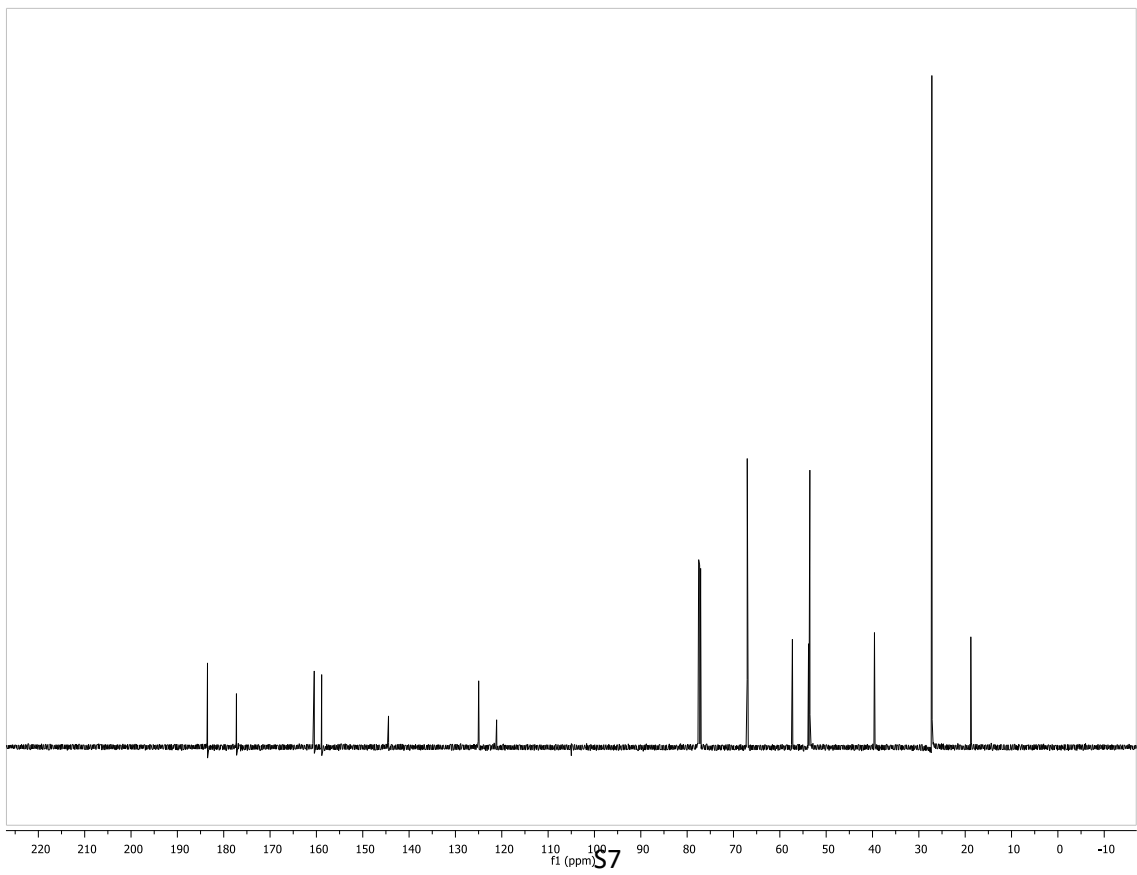

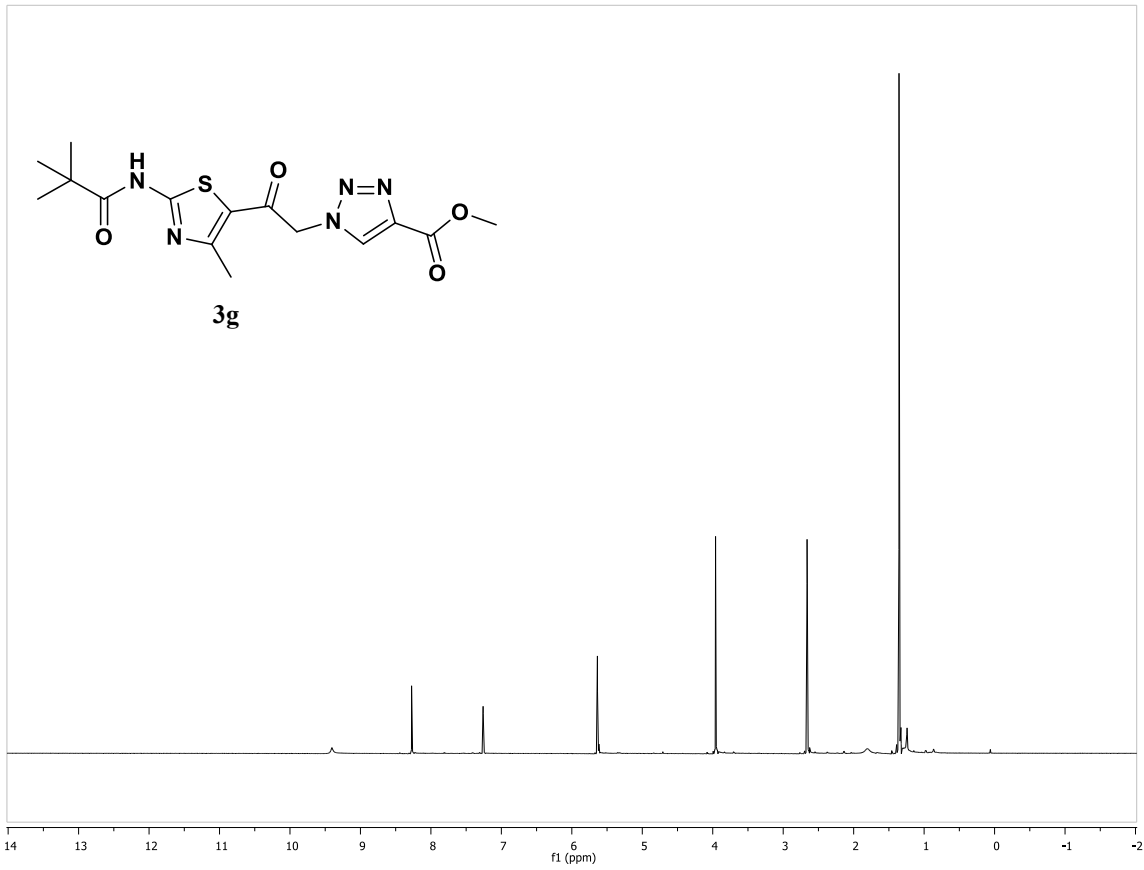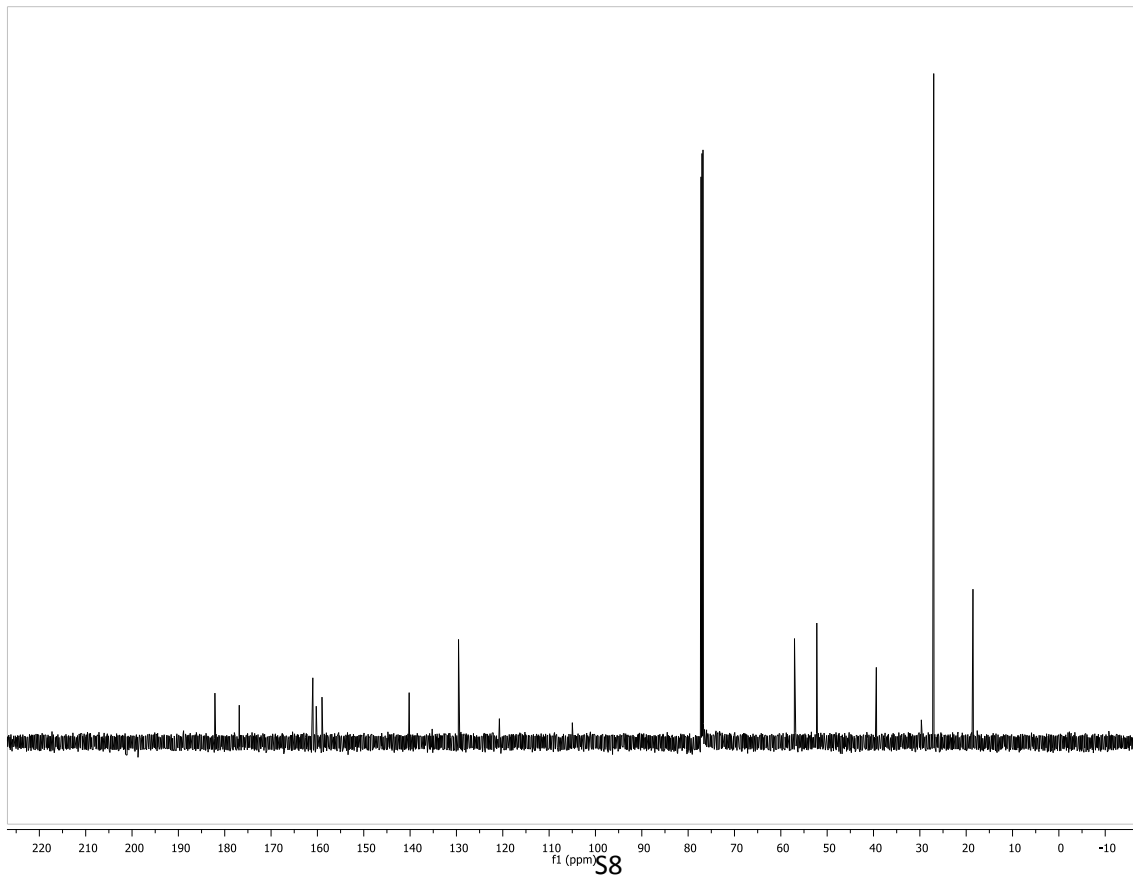



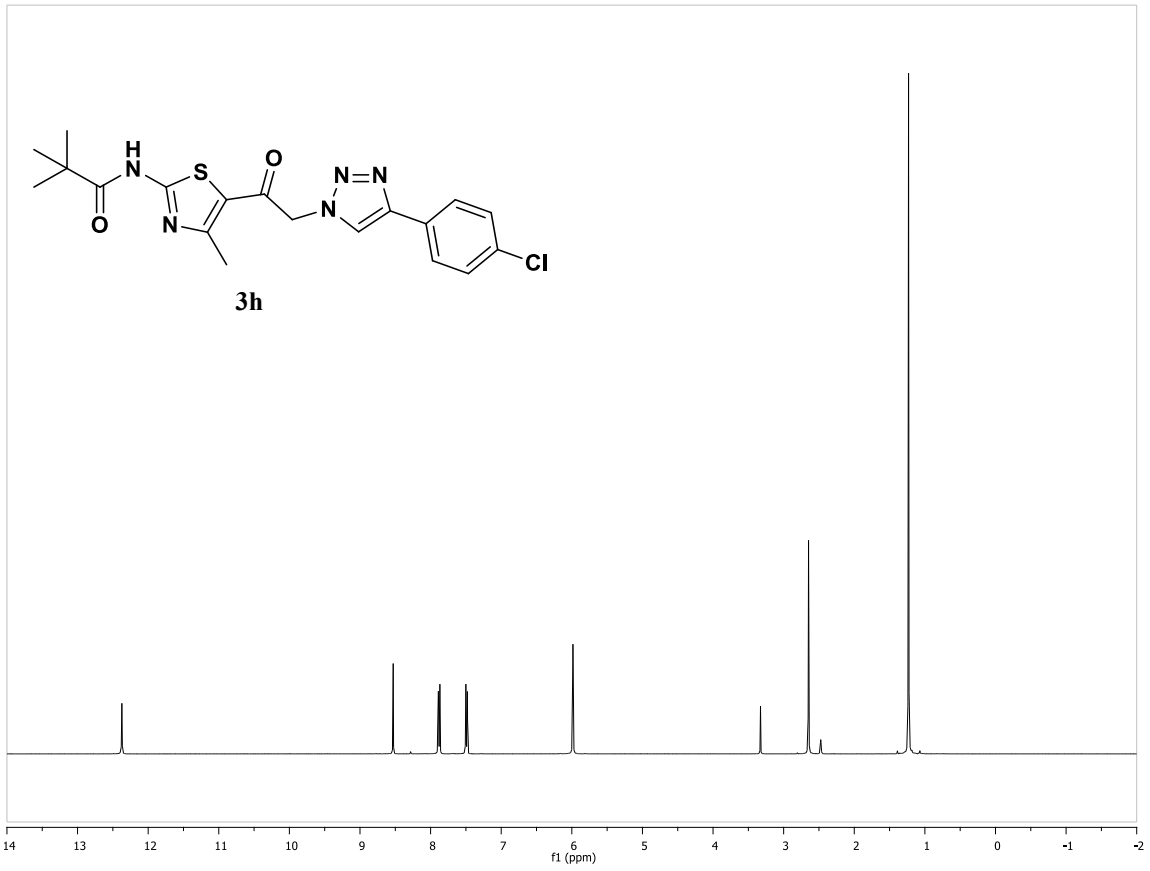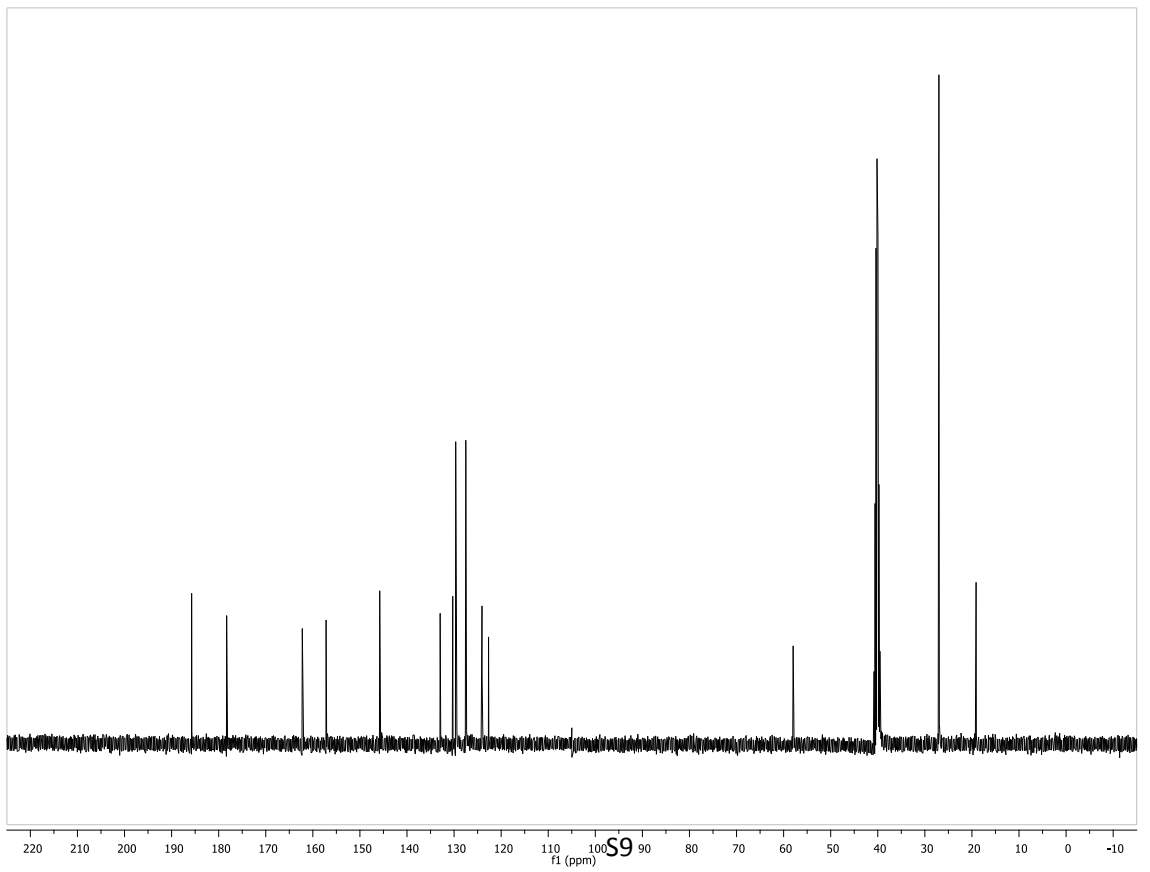

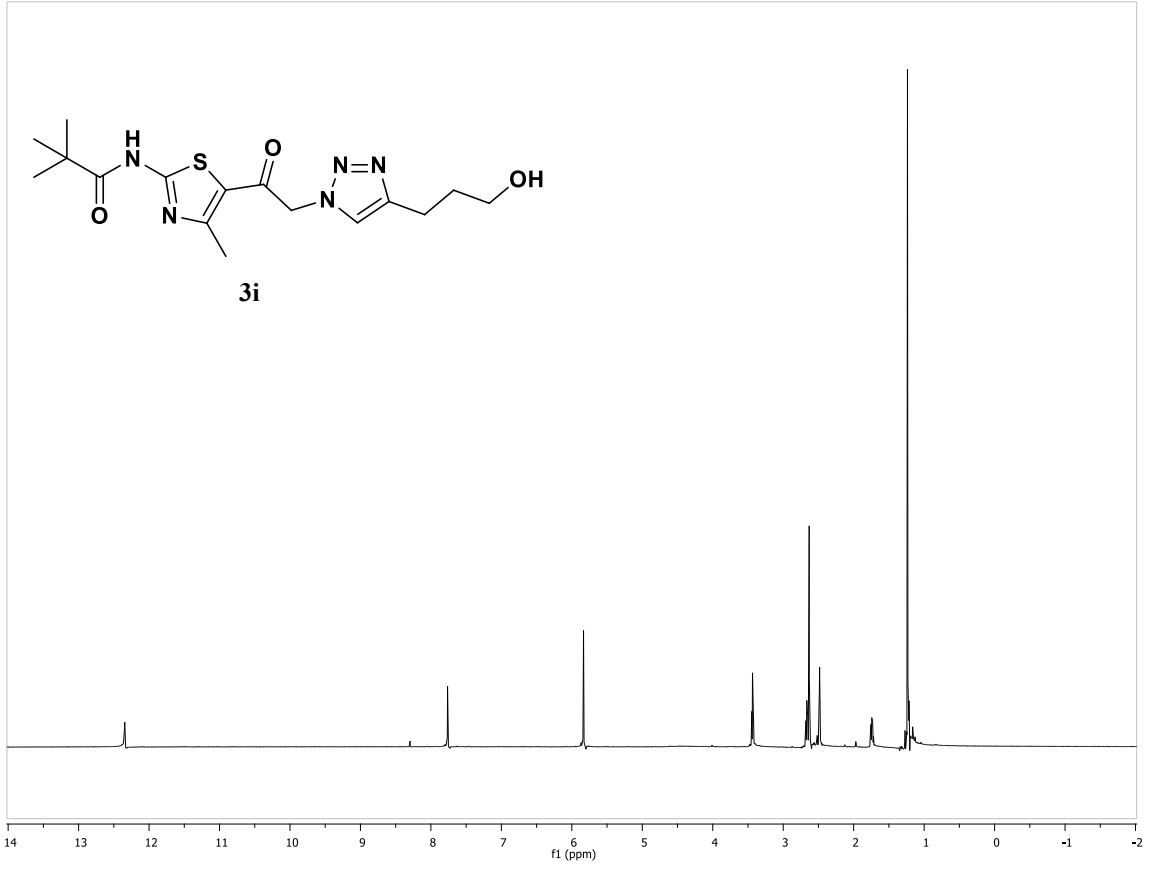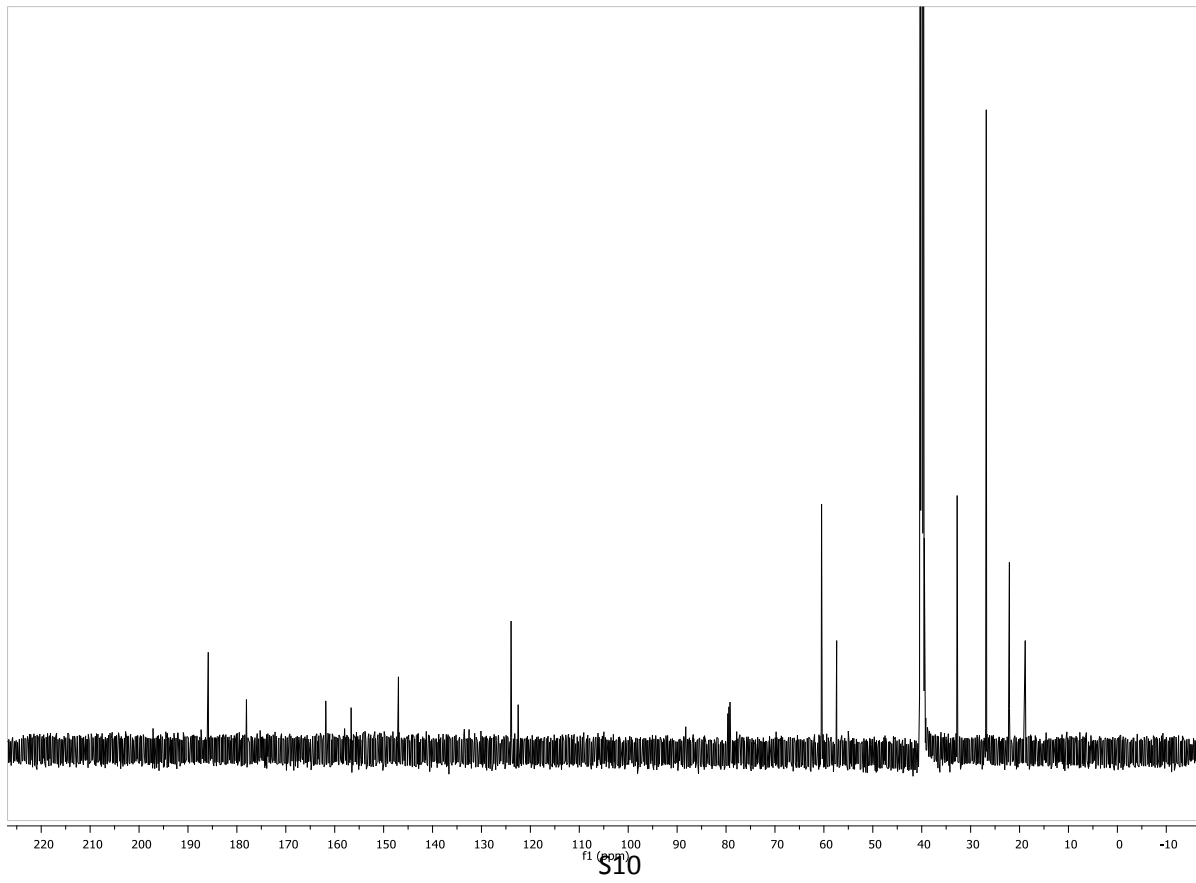

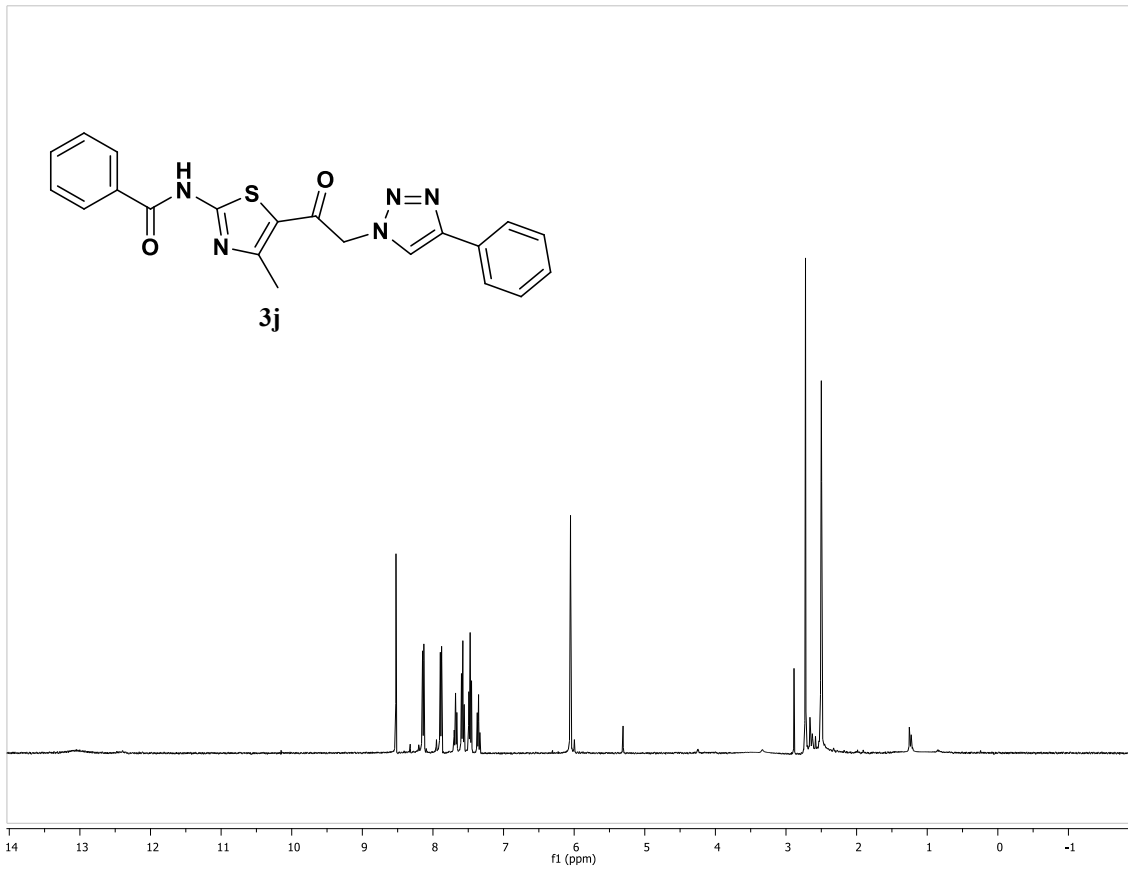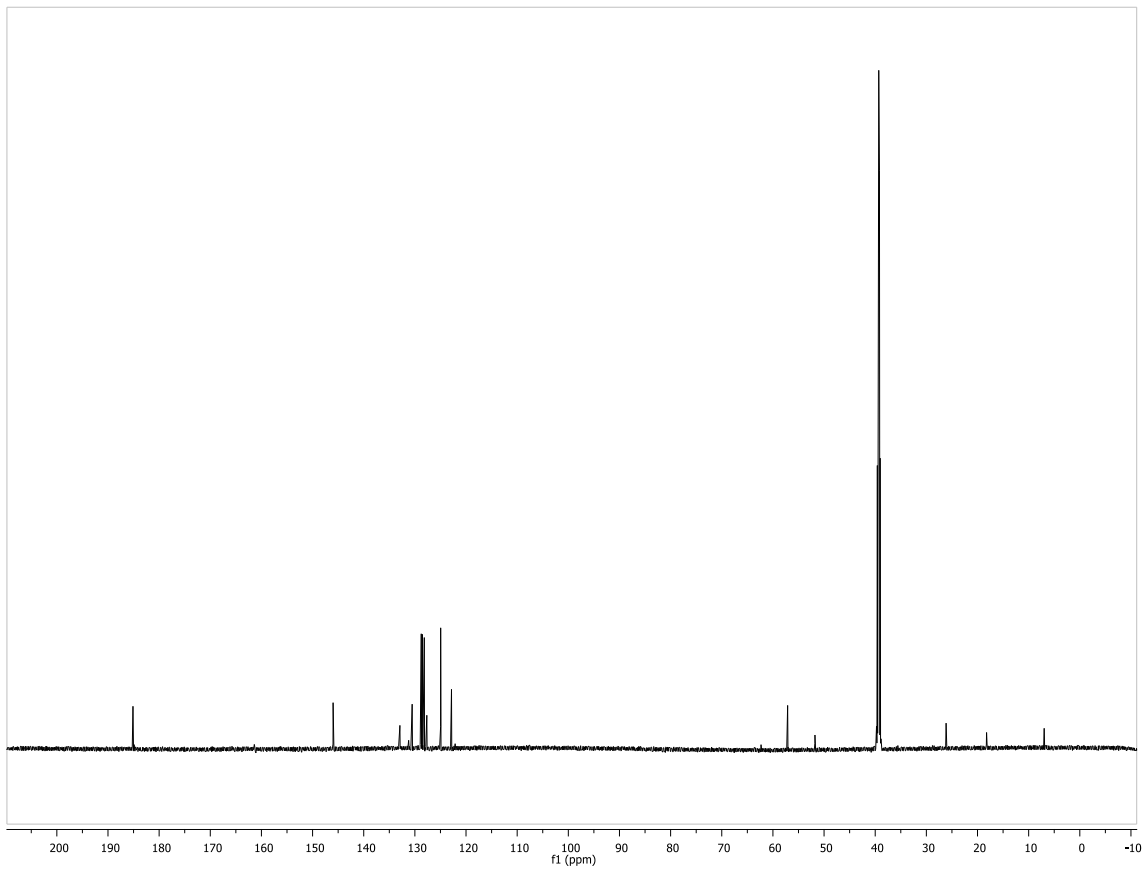

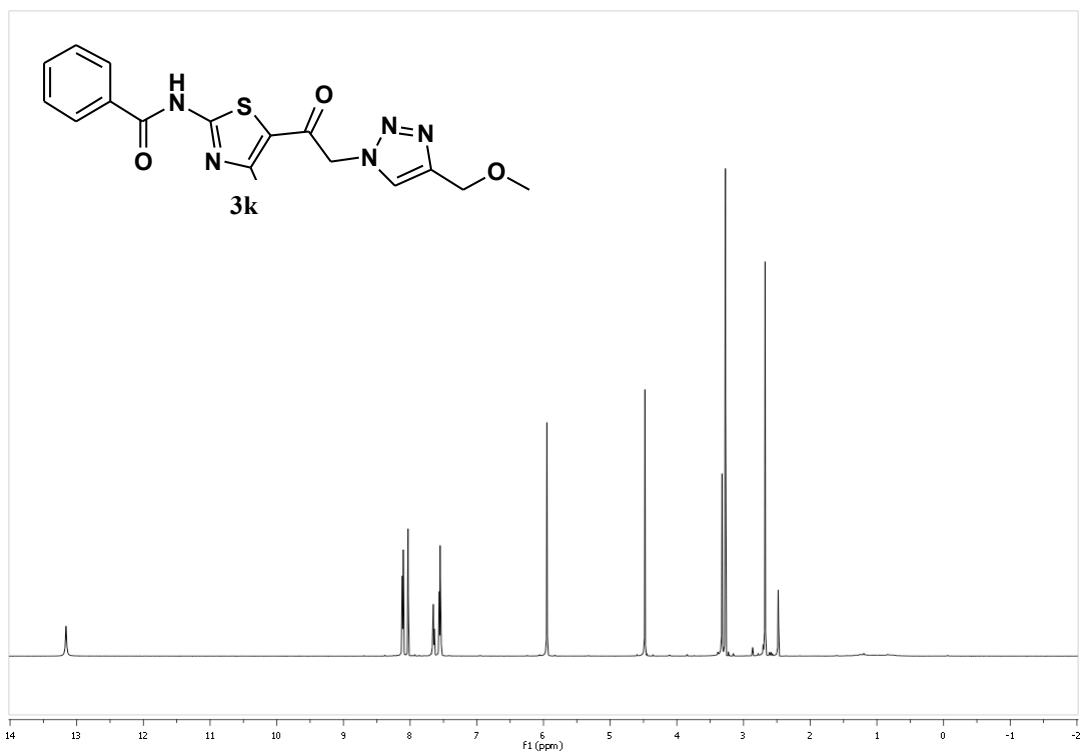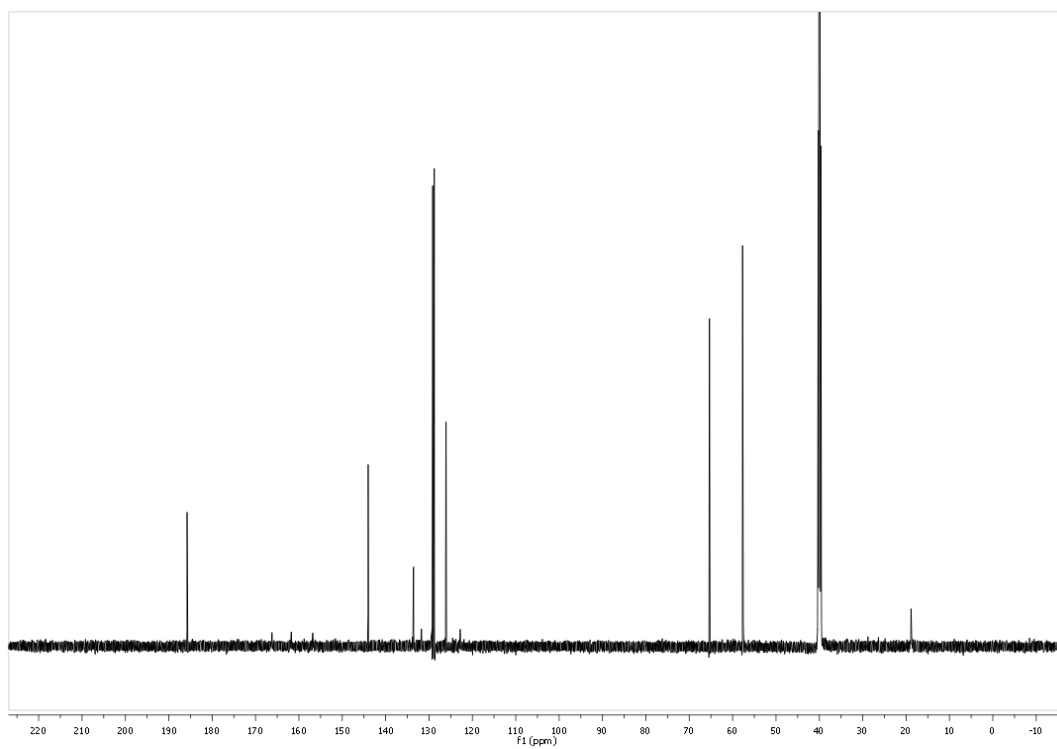

31

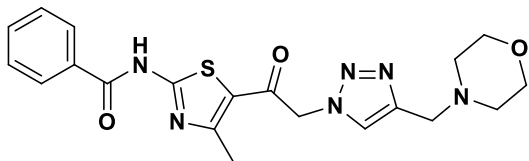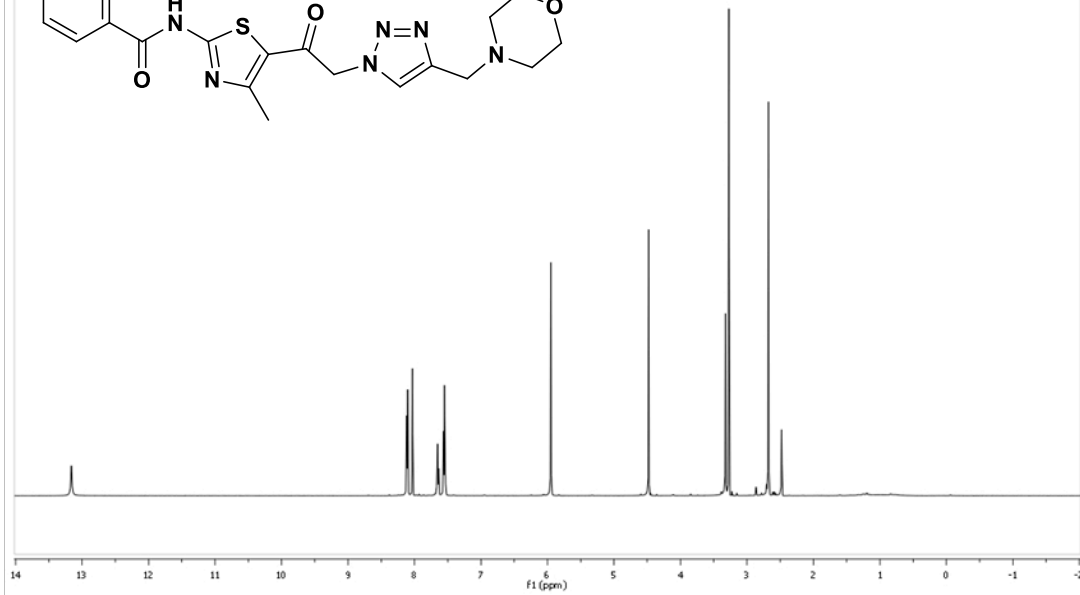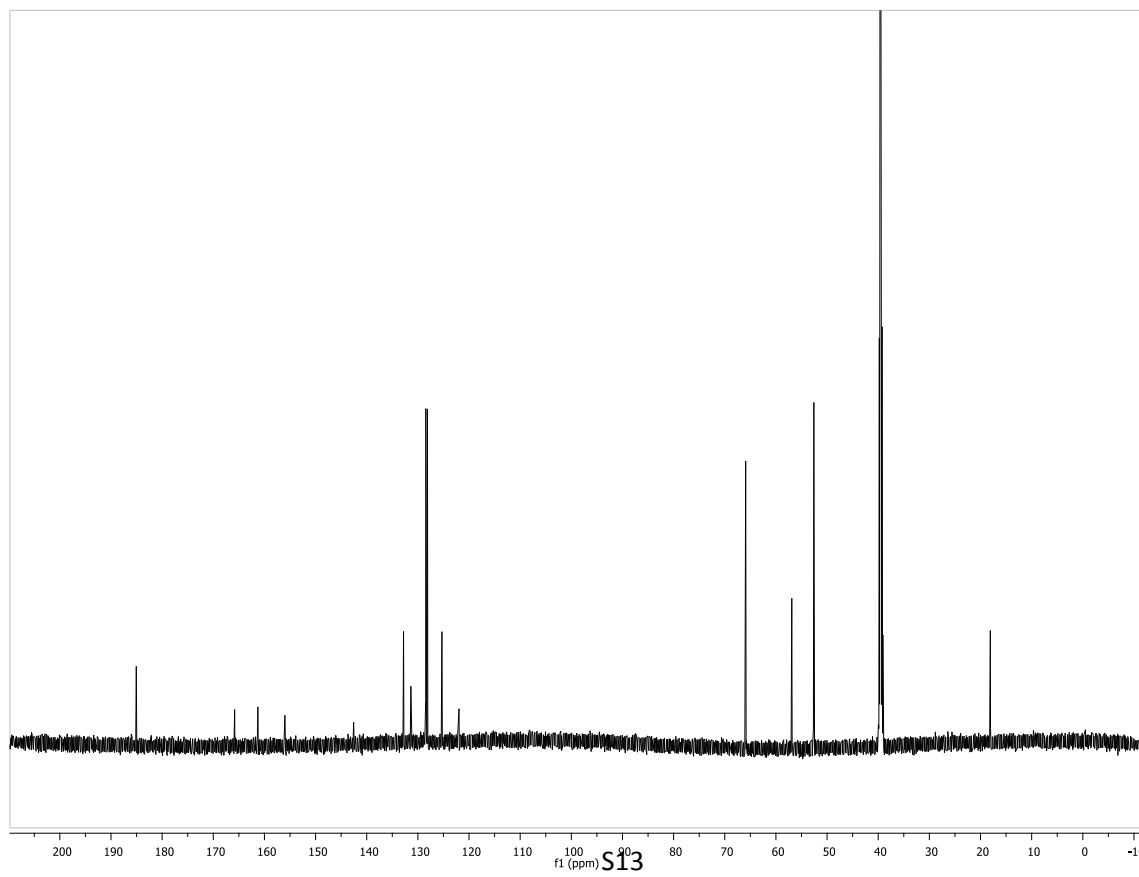

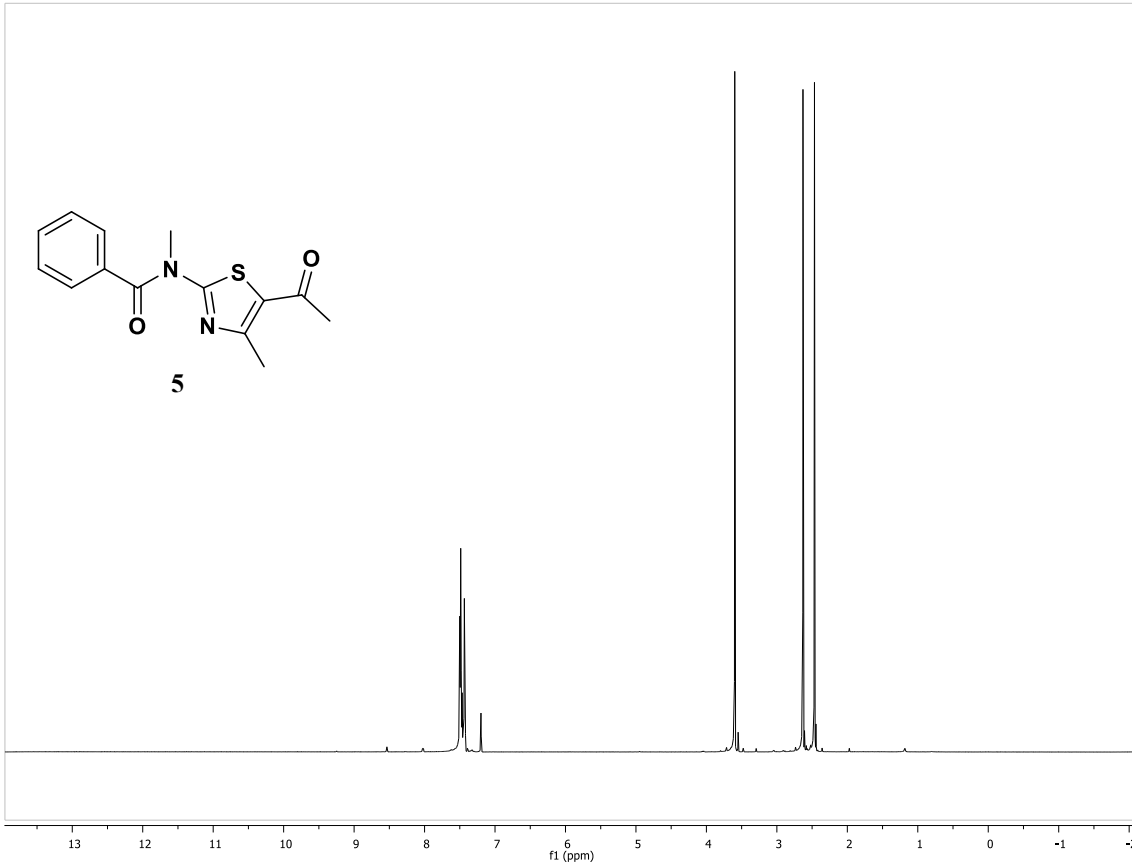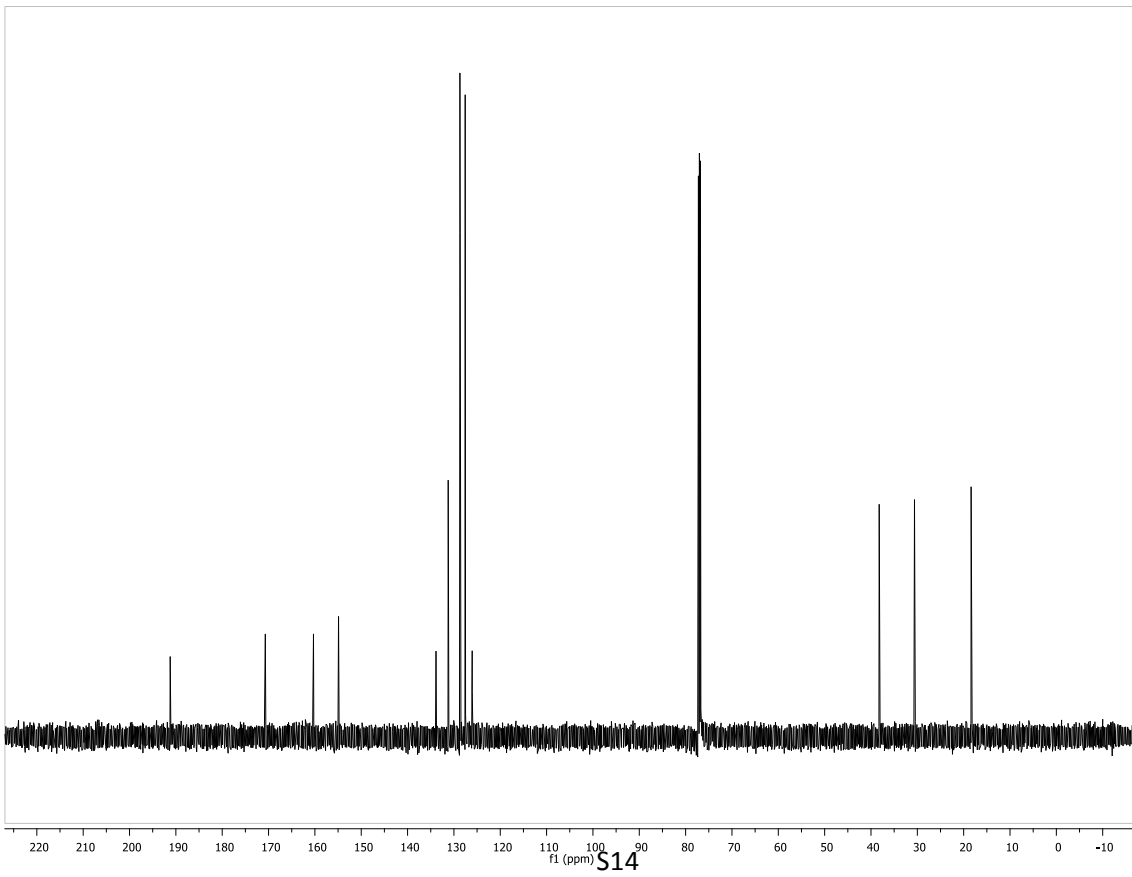

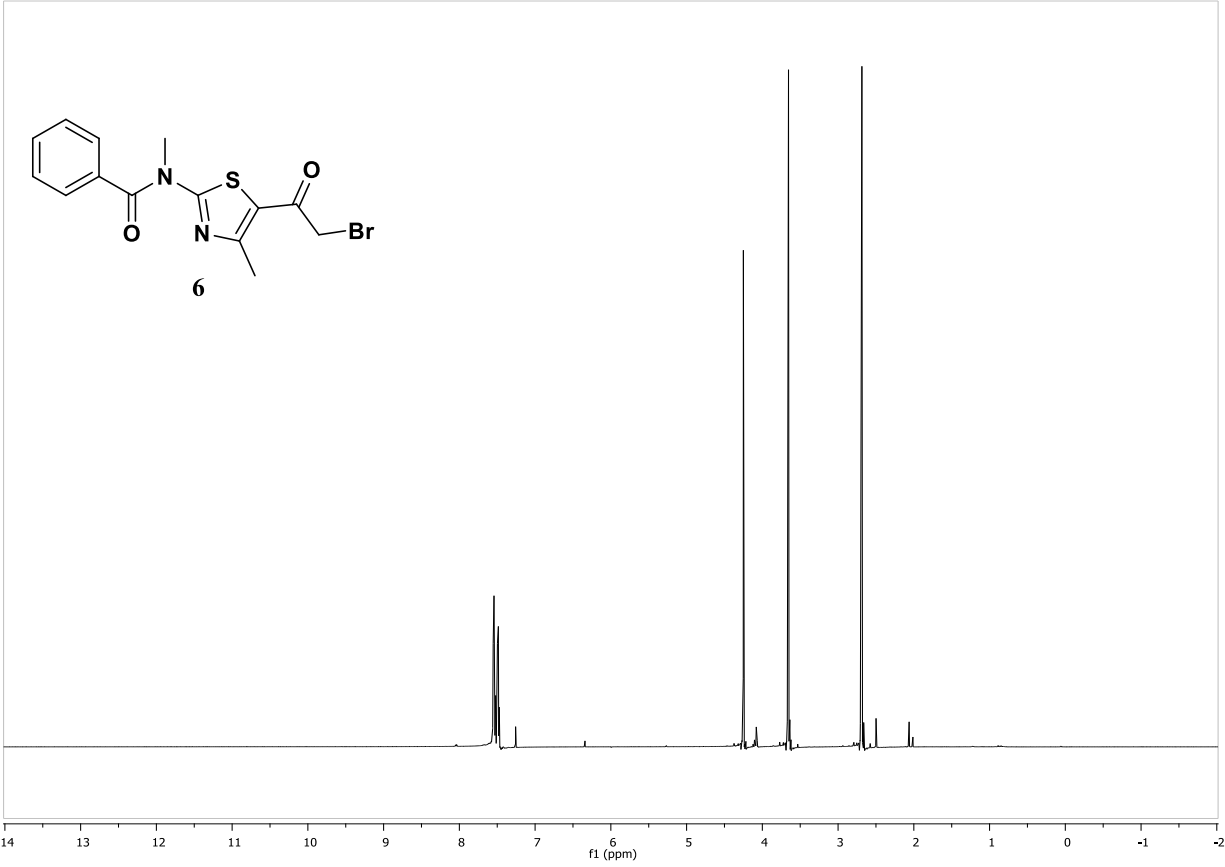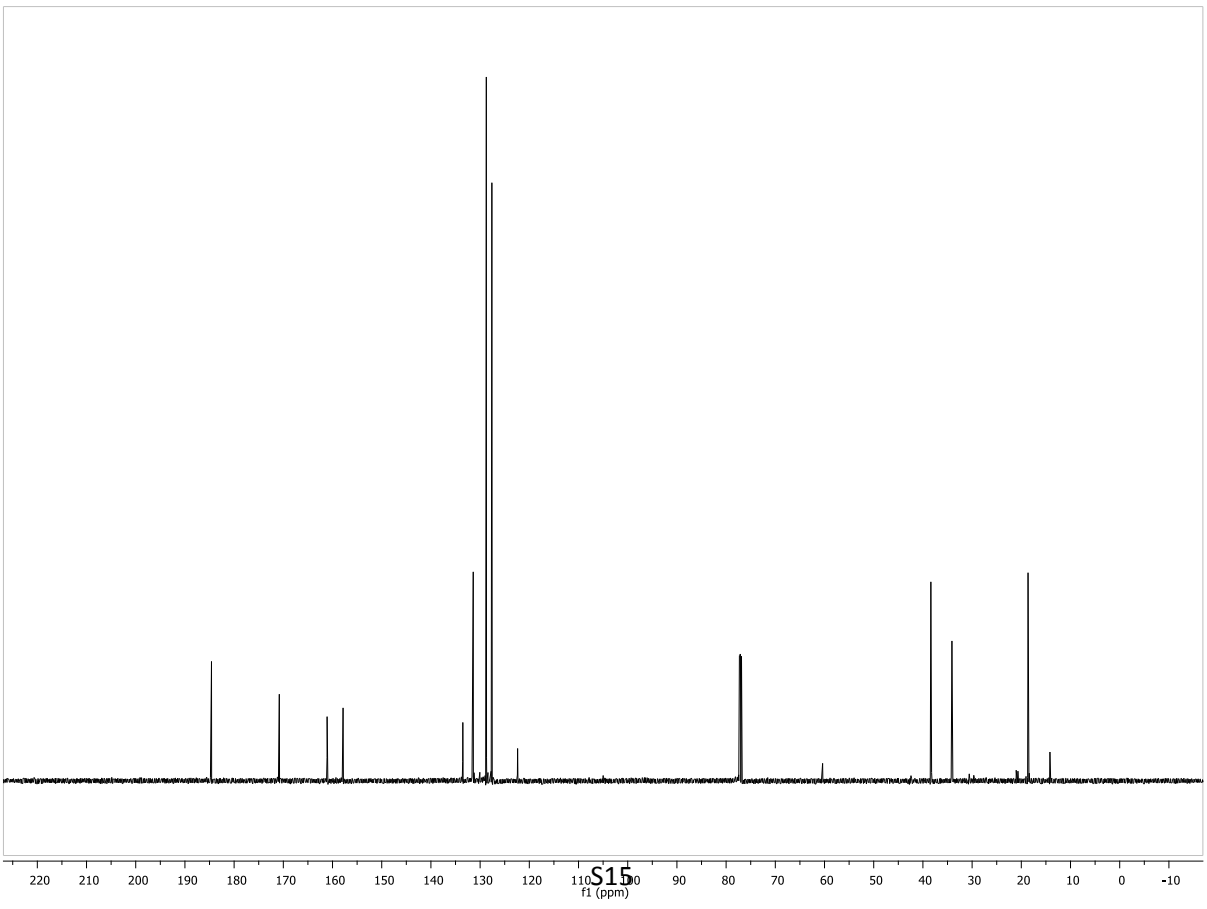

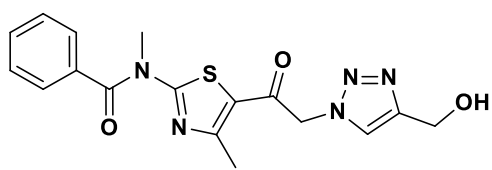

7

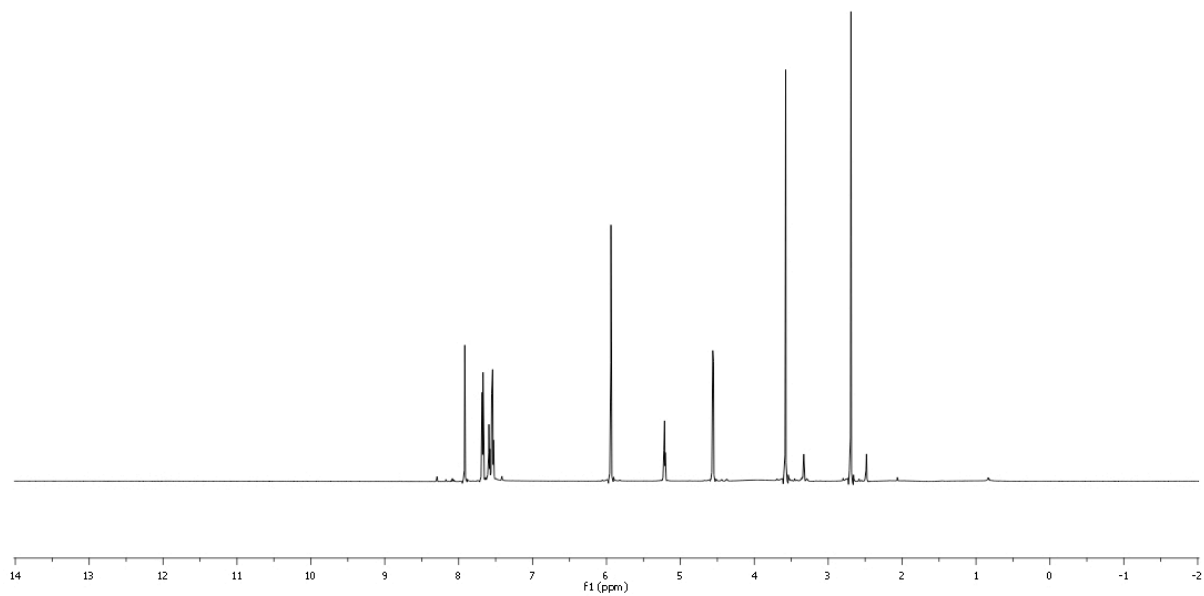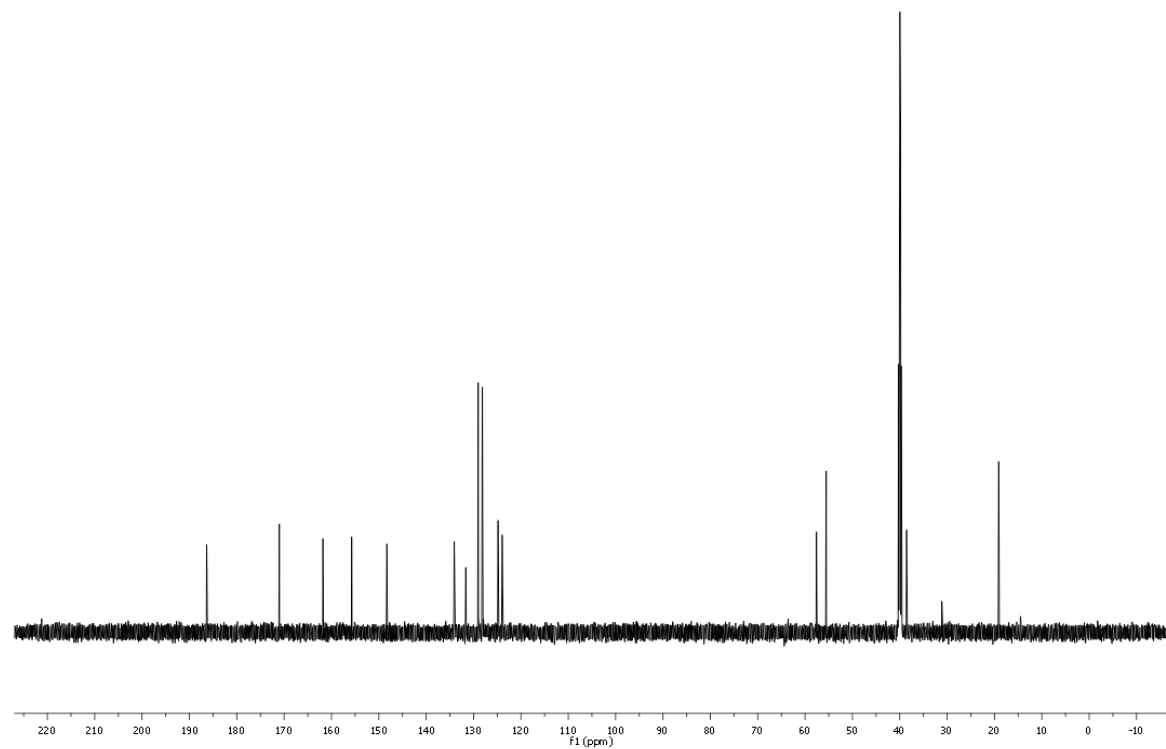



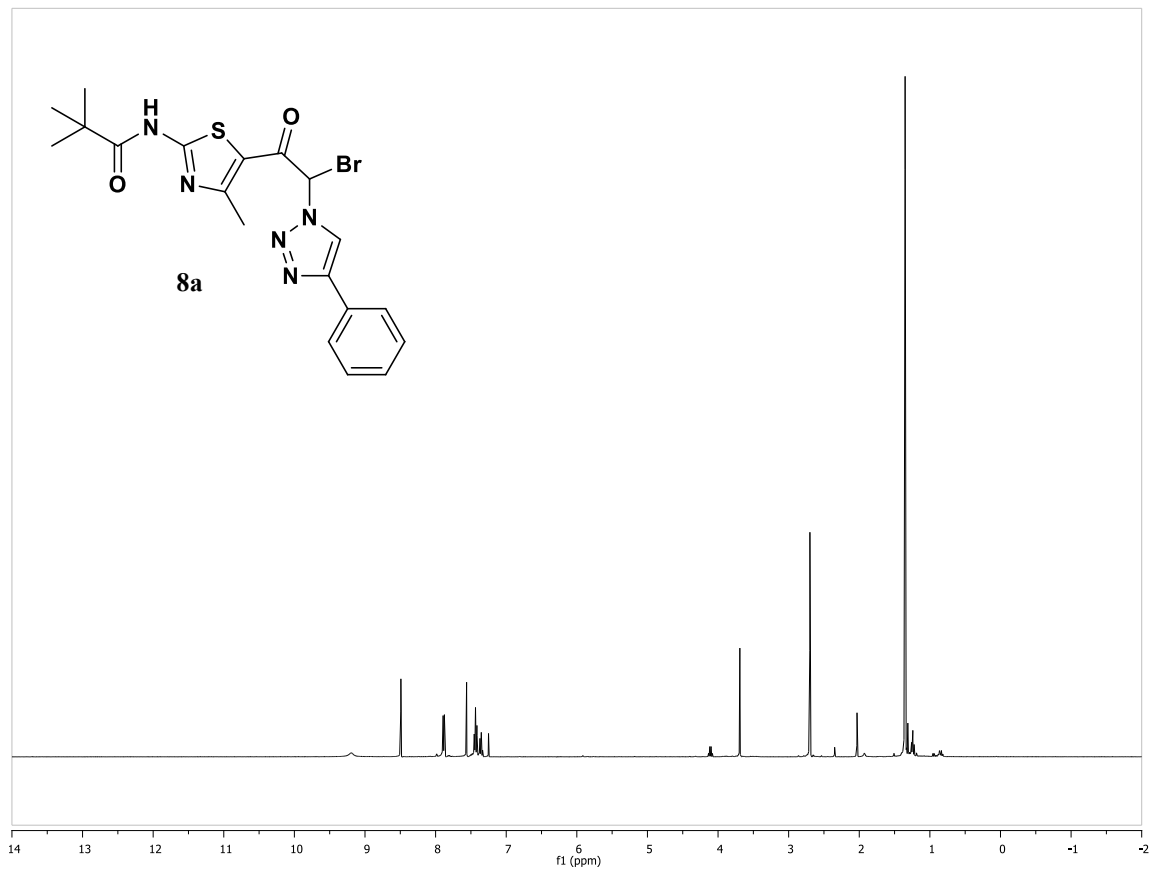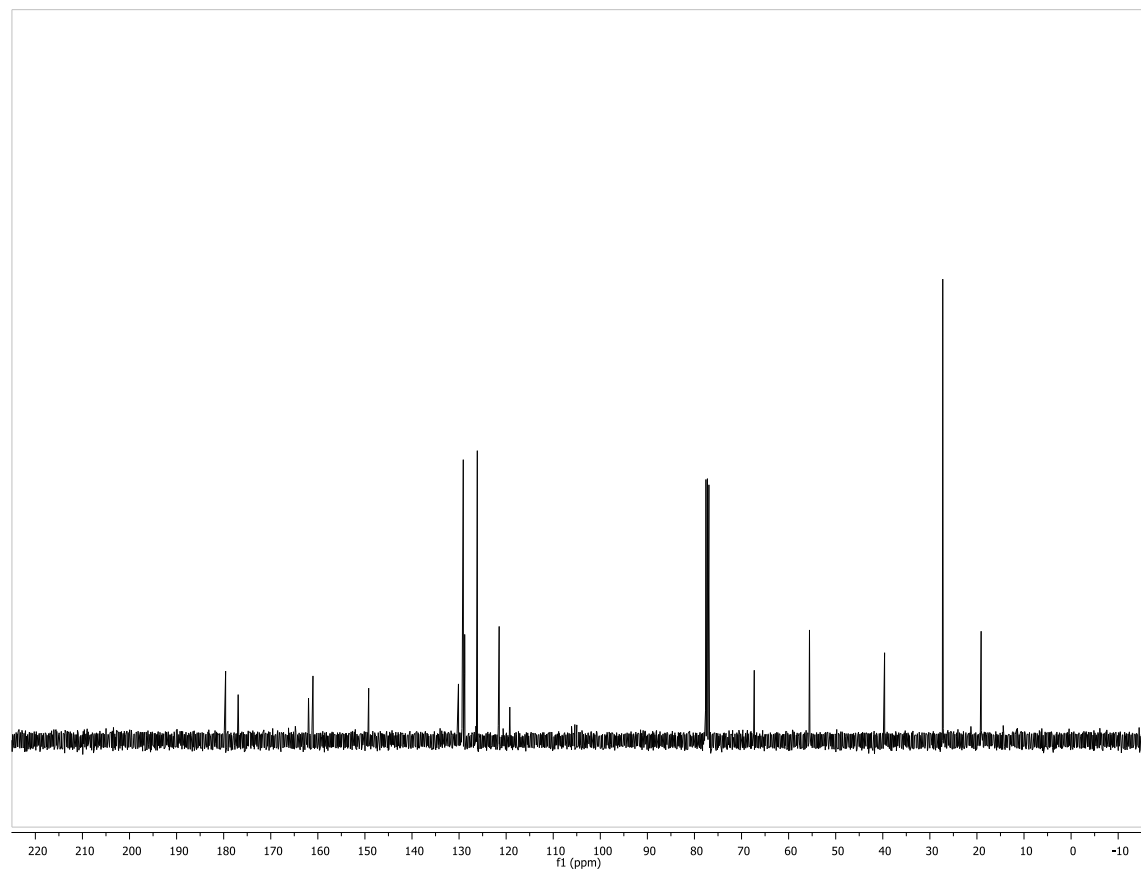

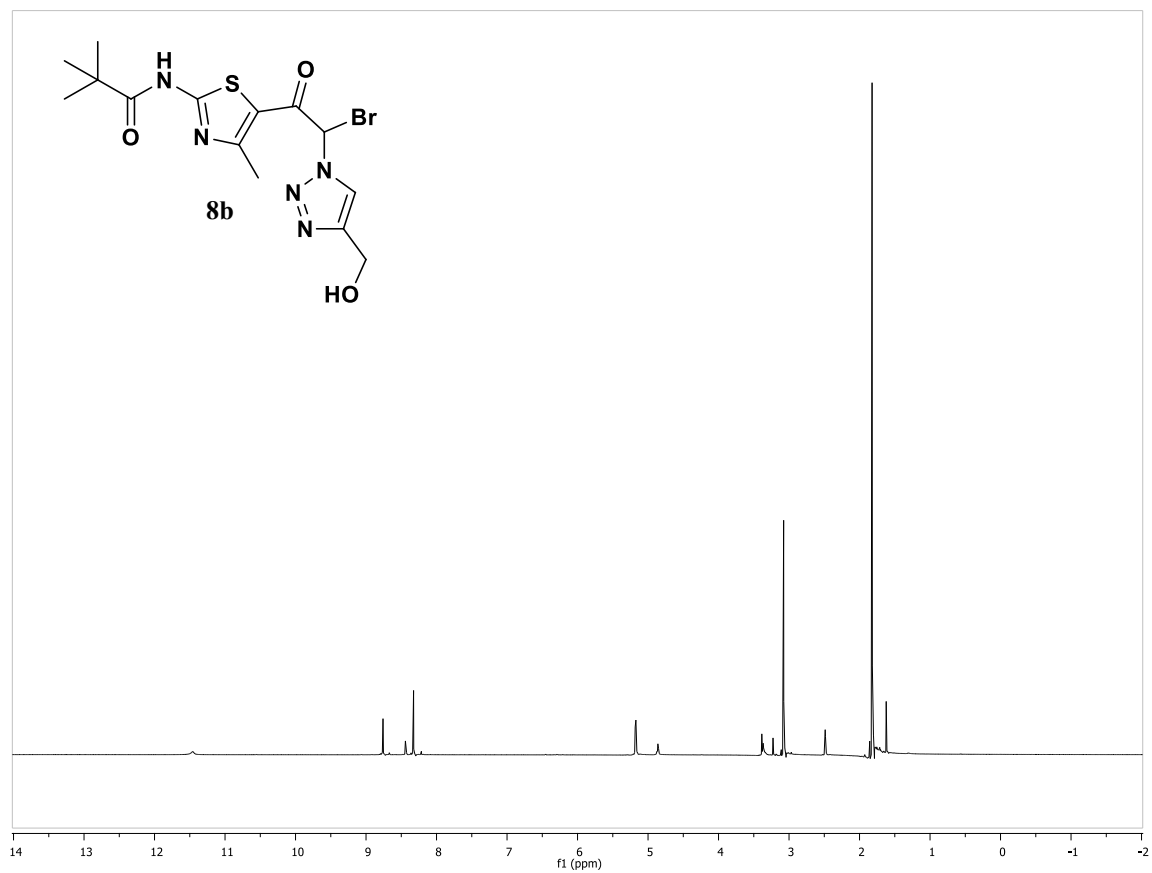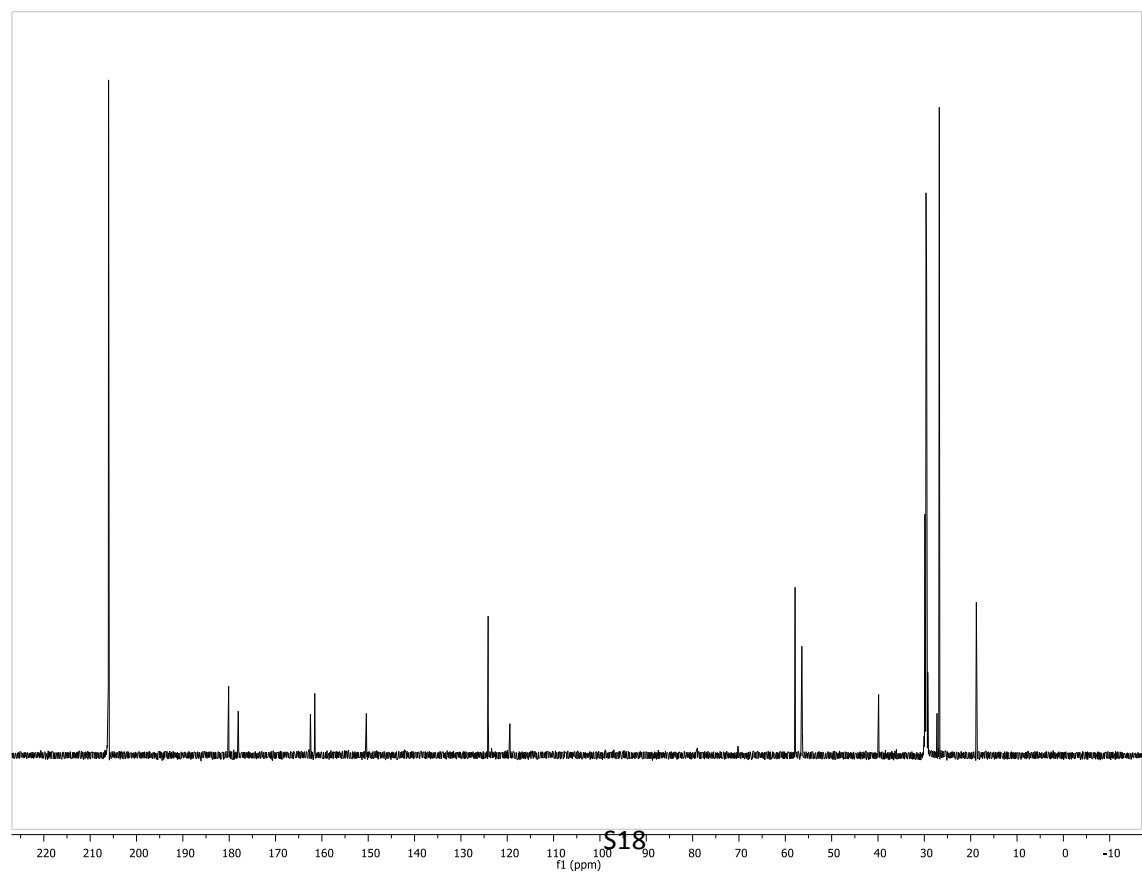

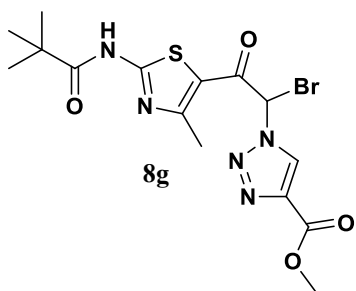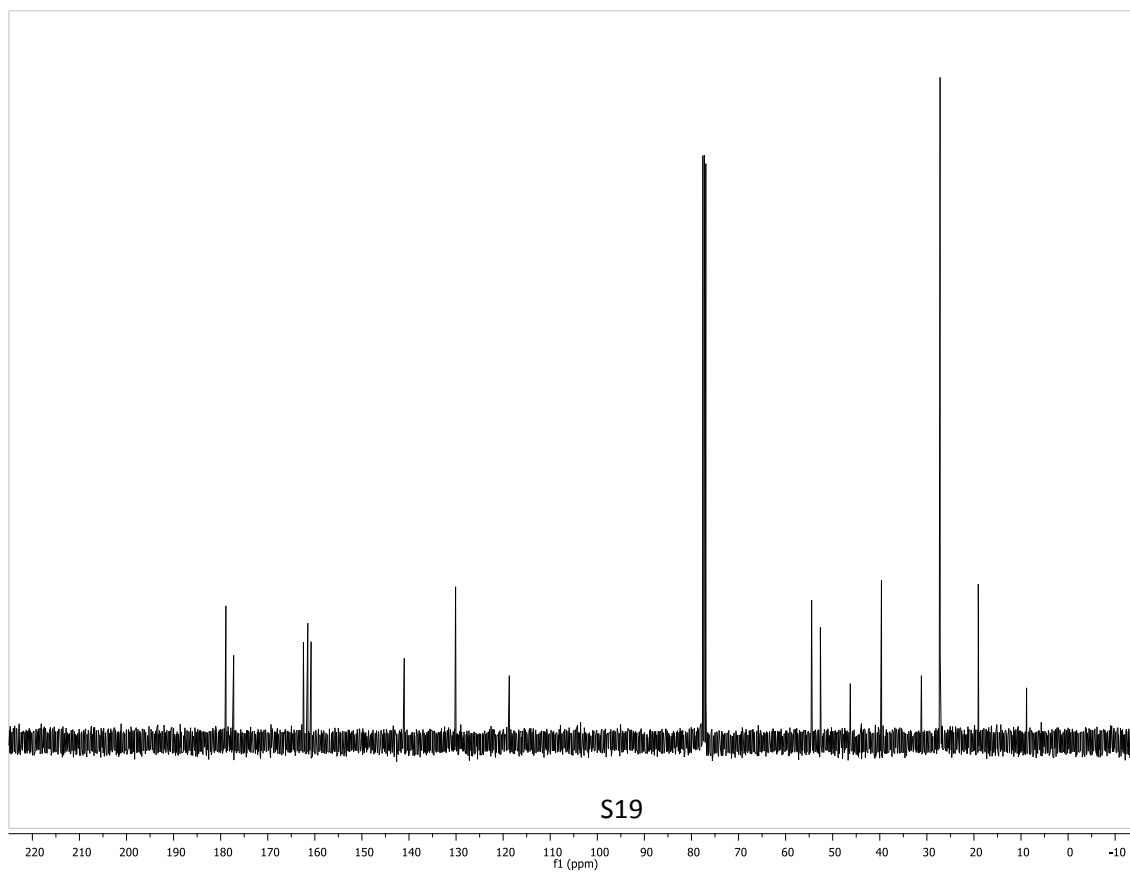

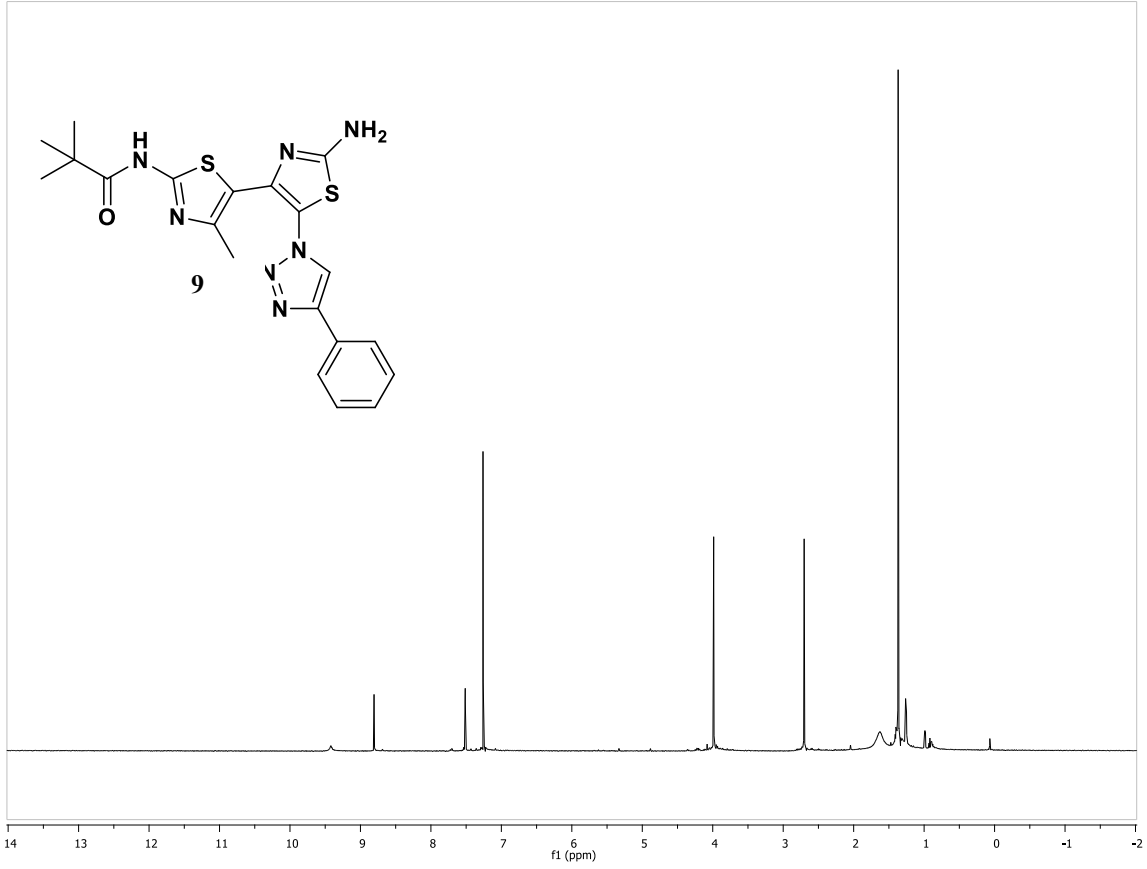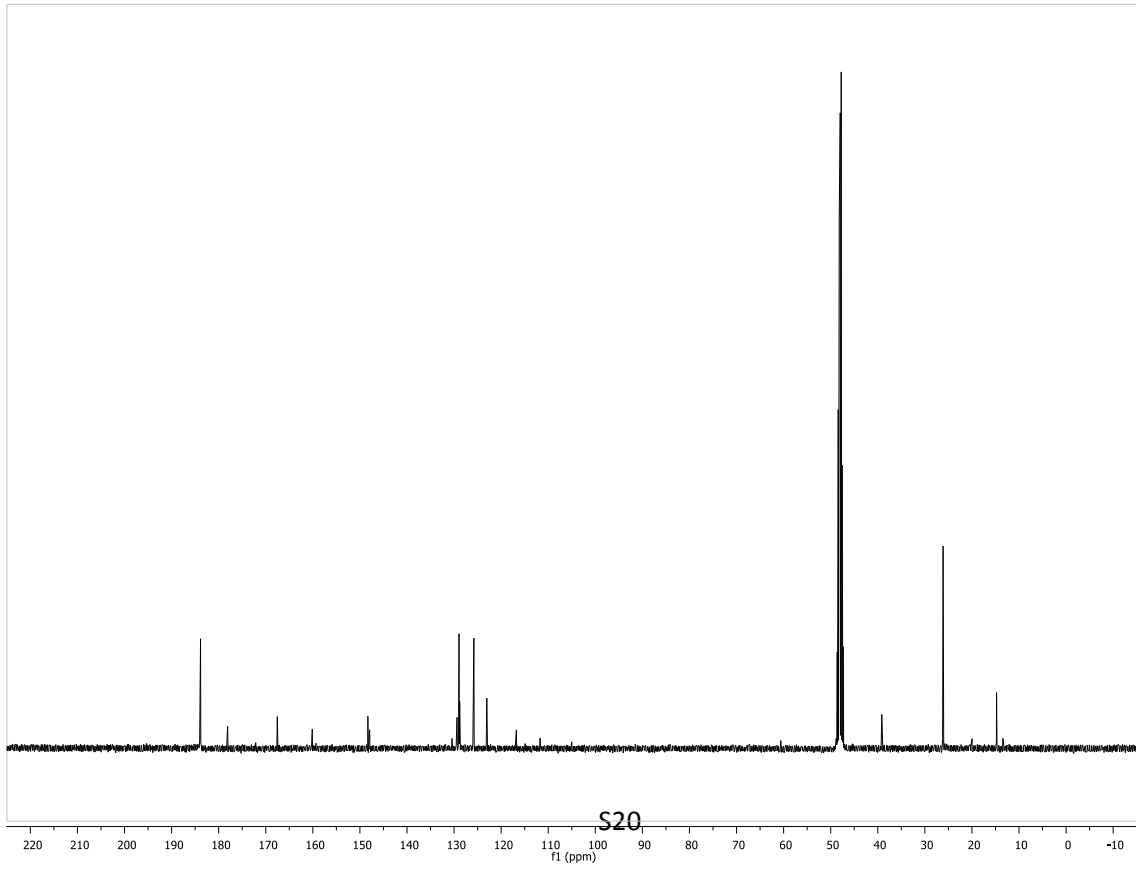

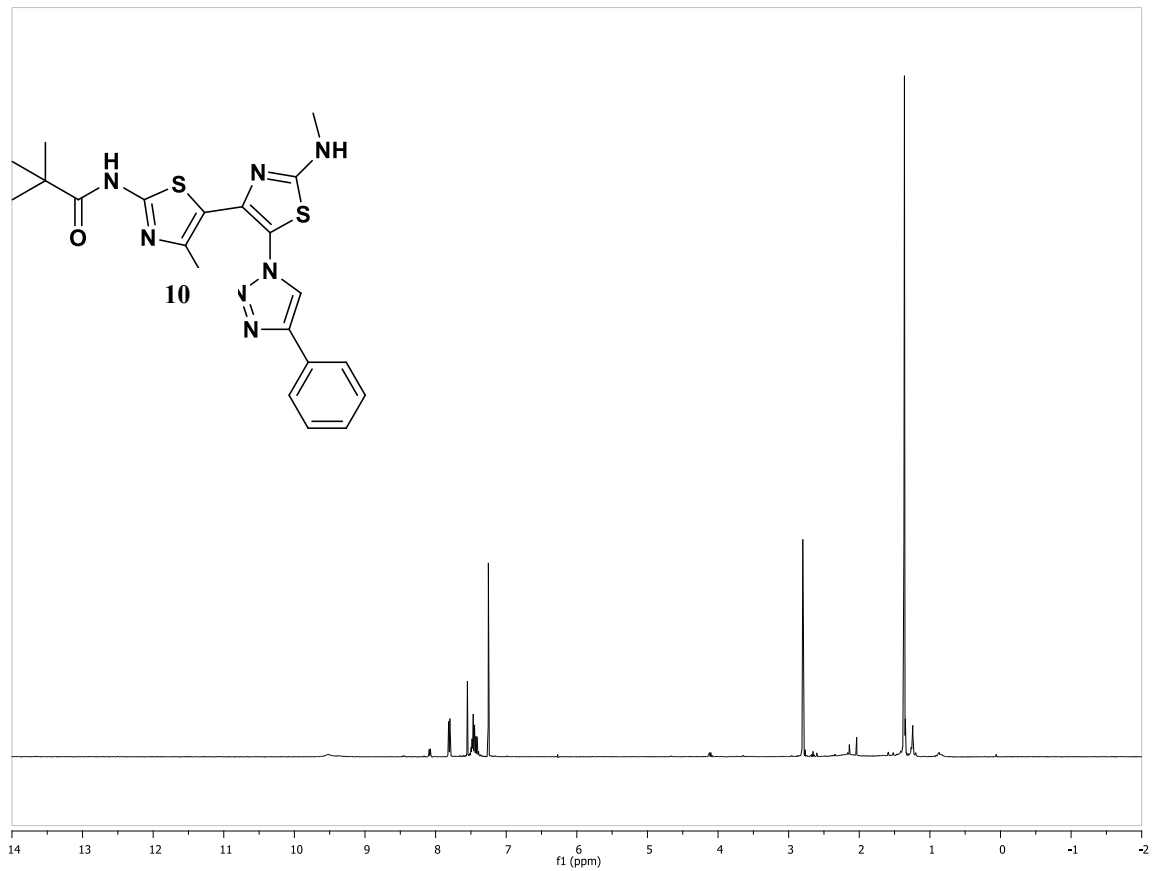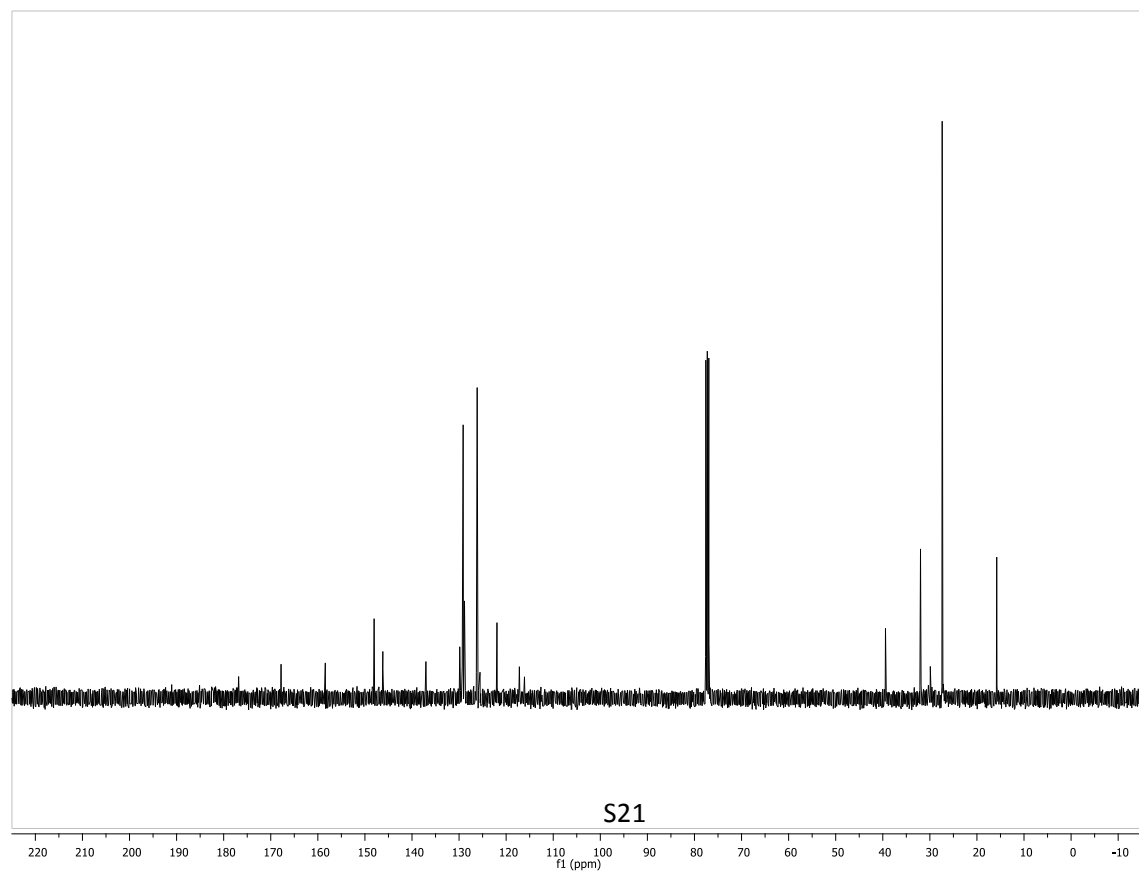

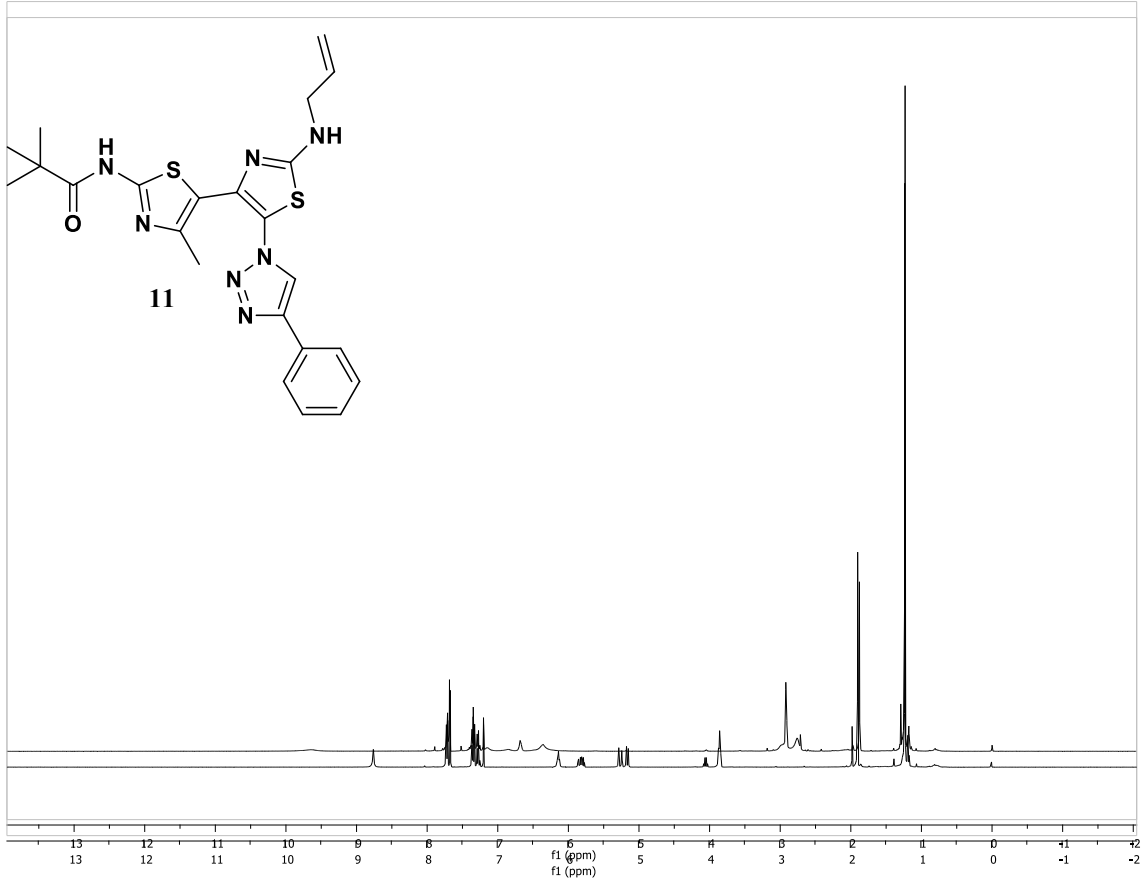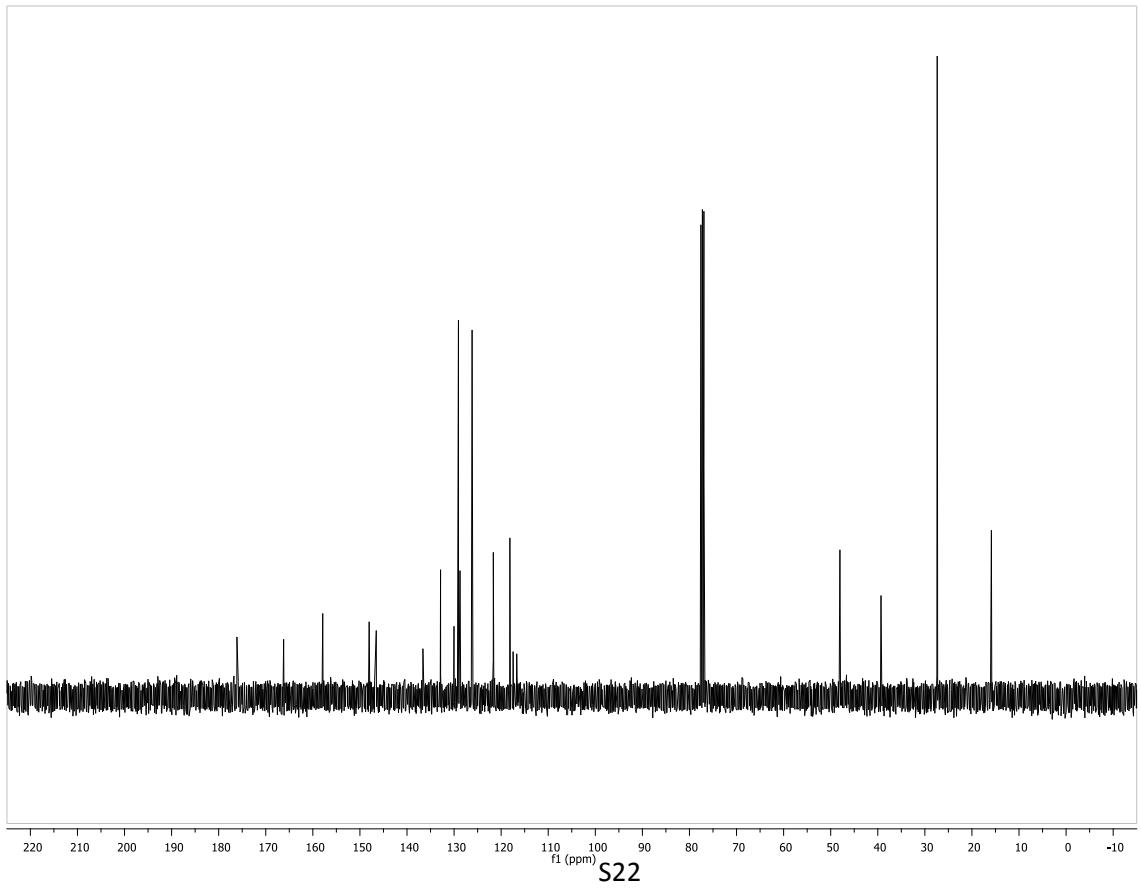

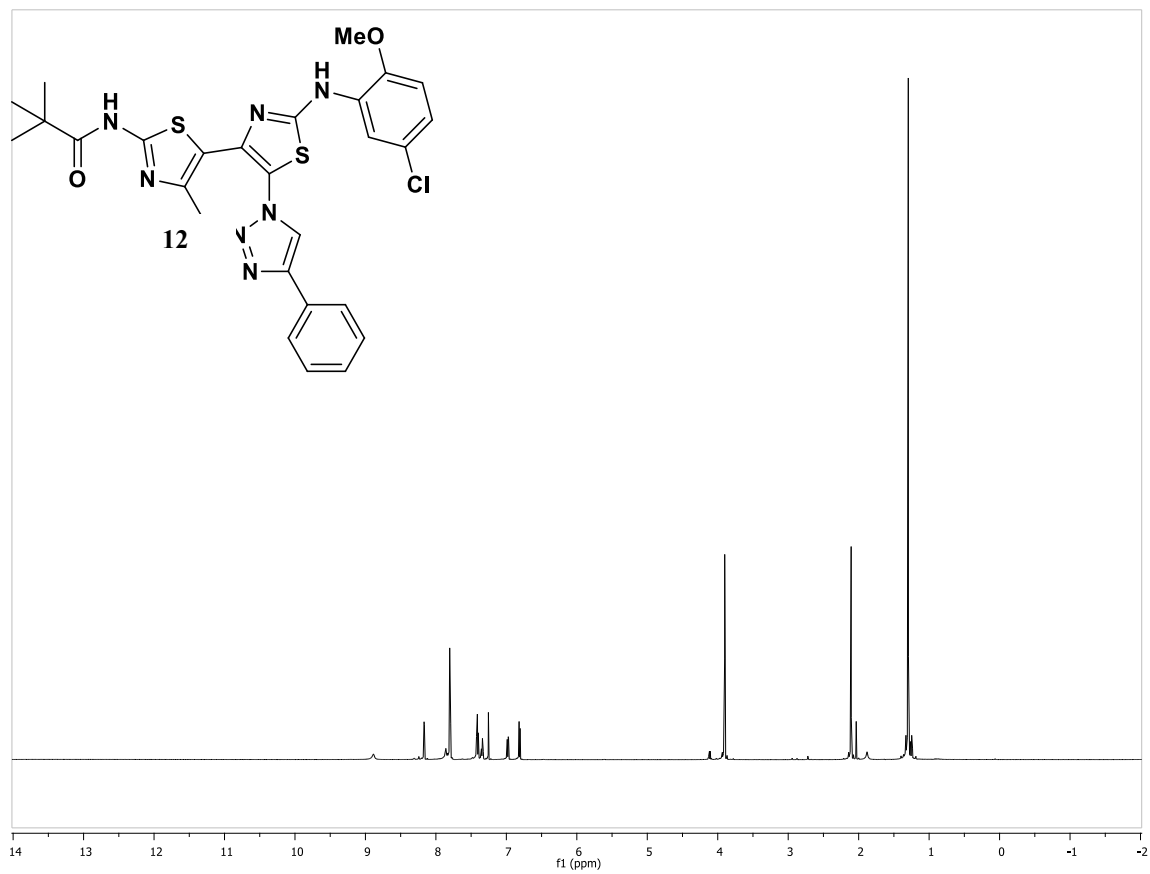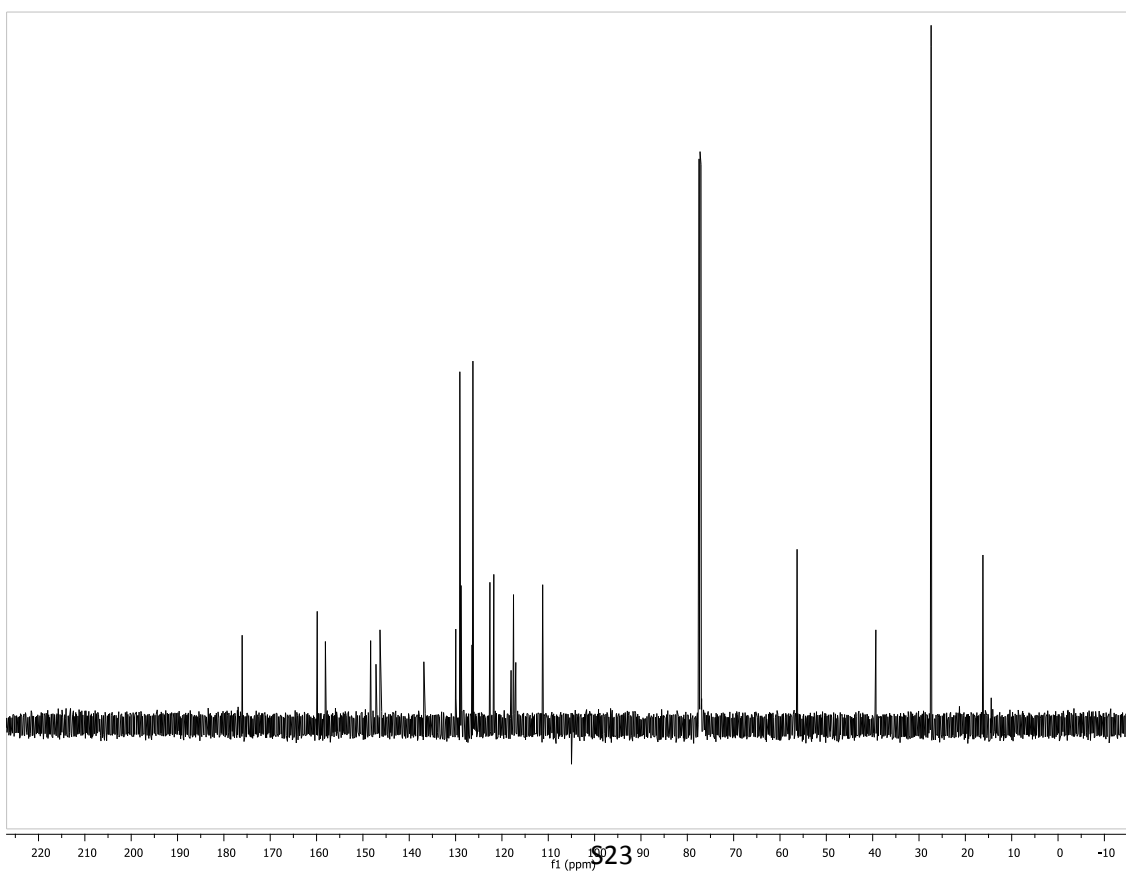

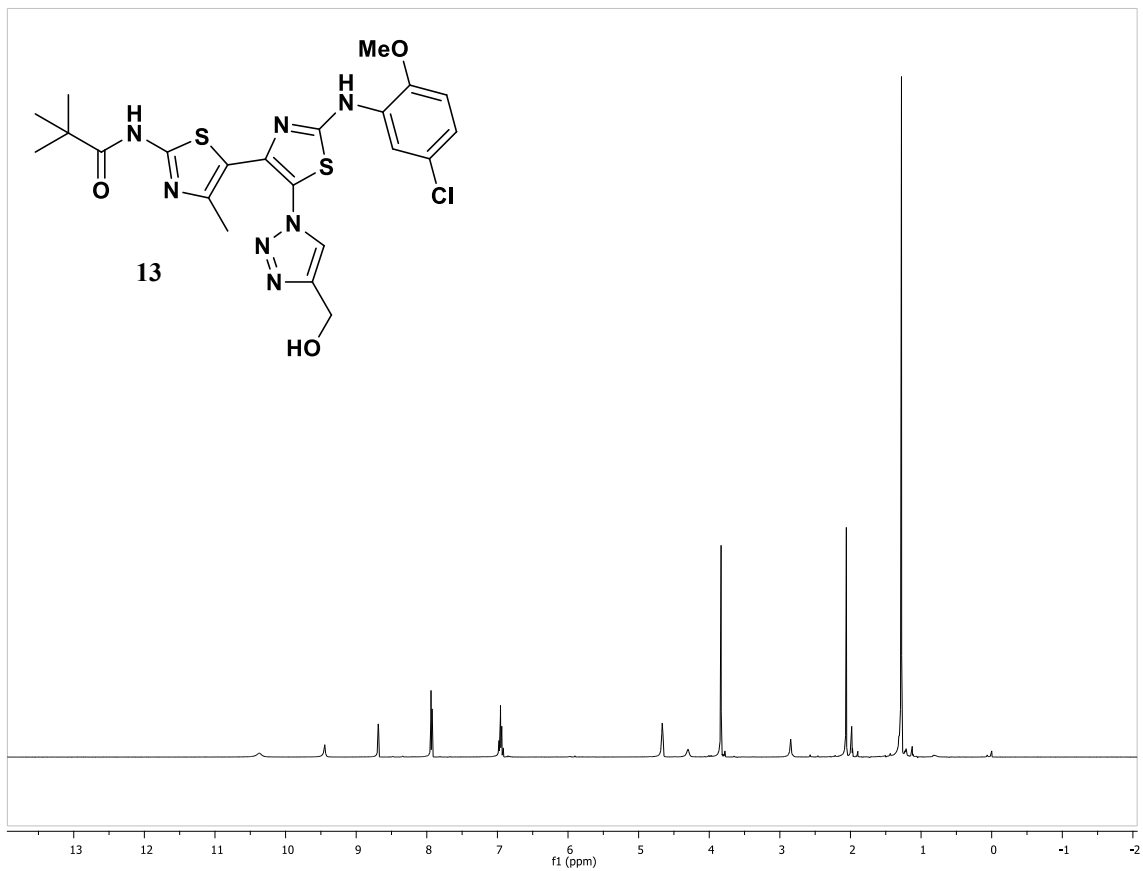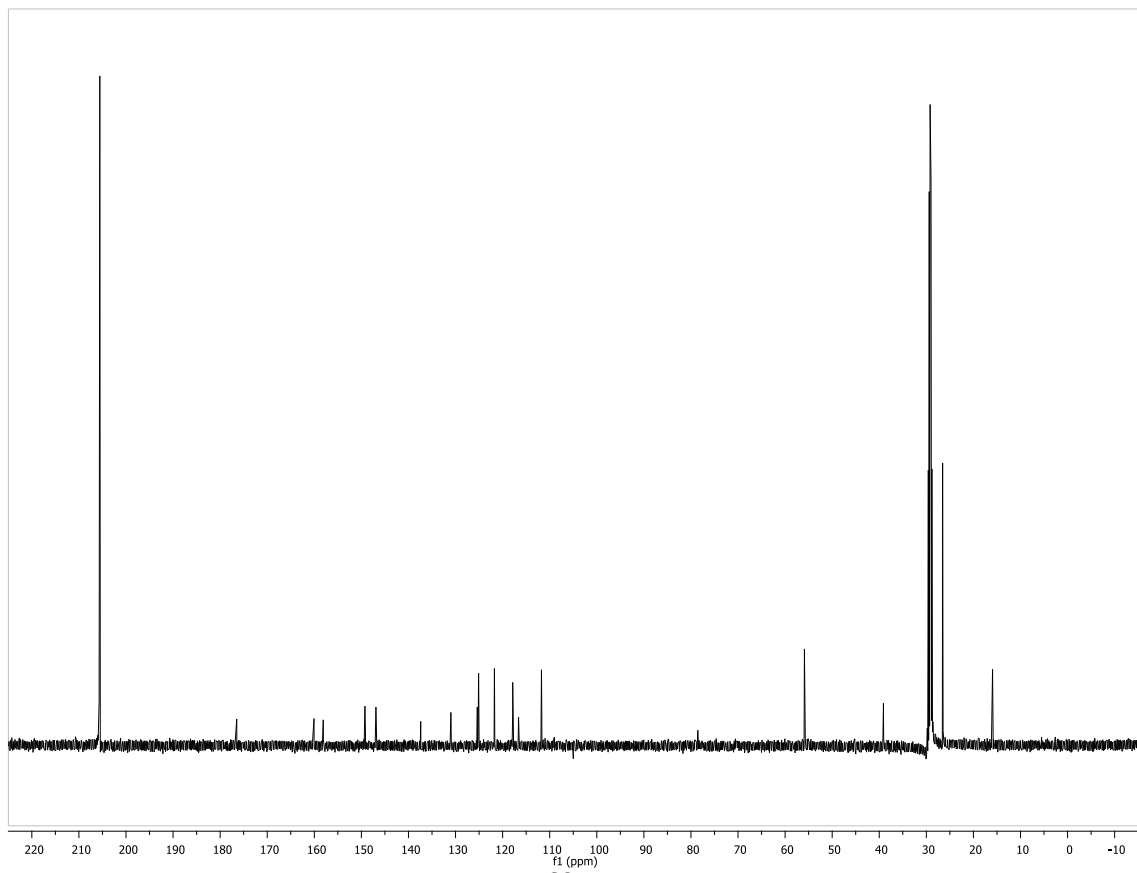



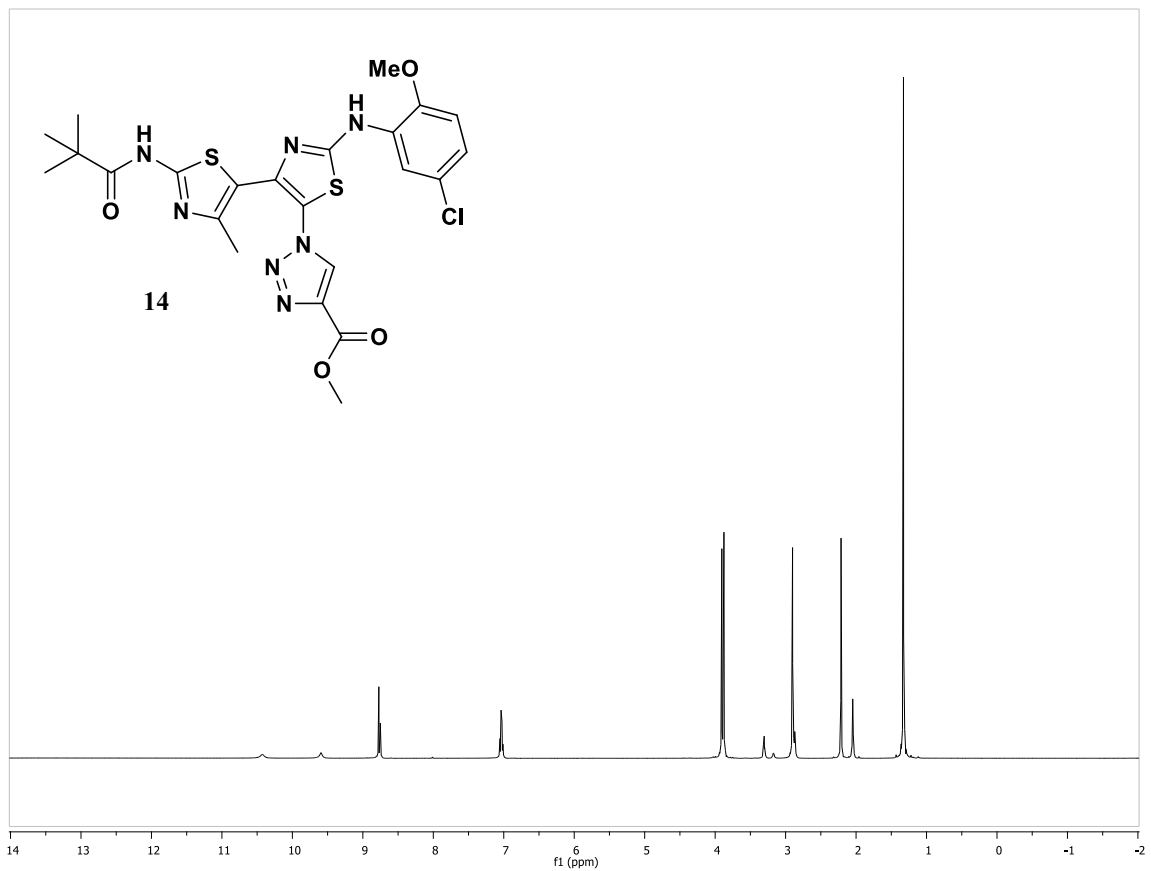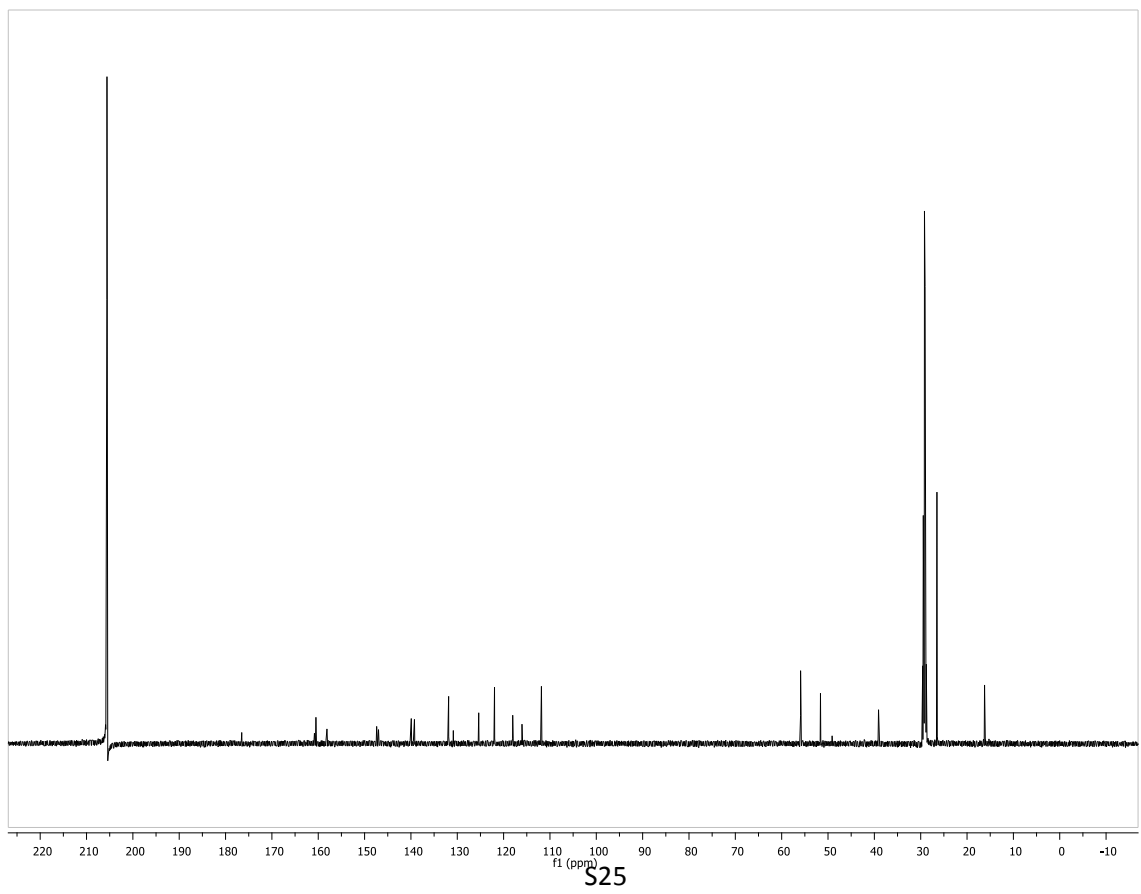

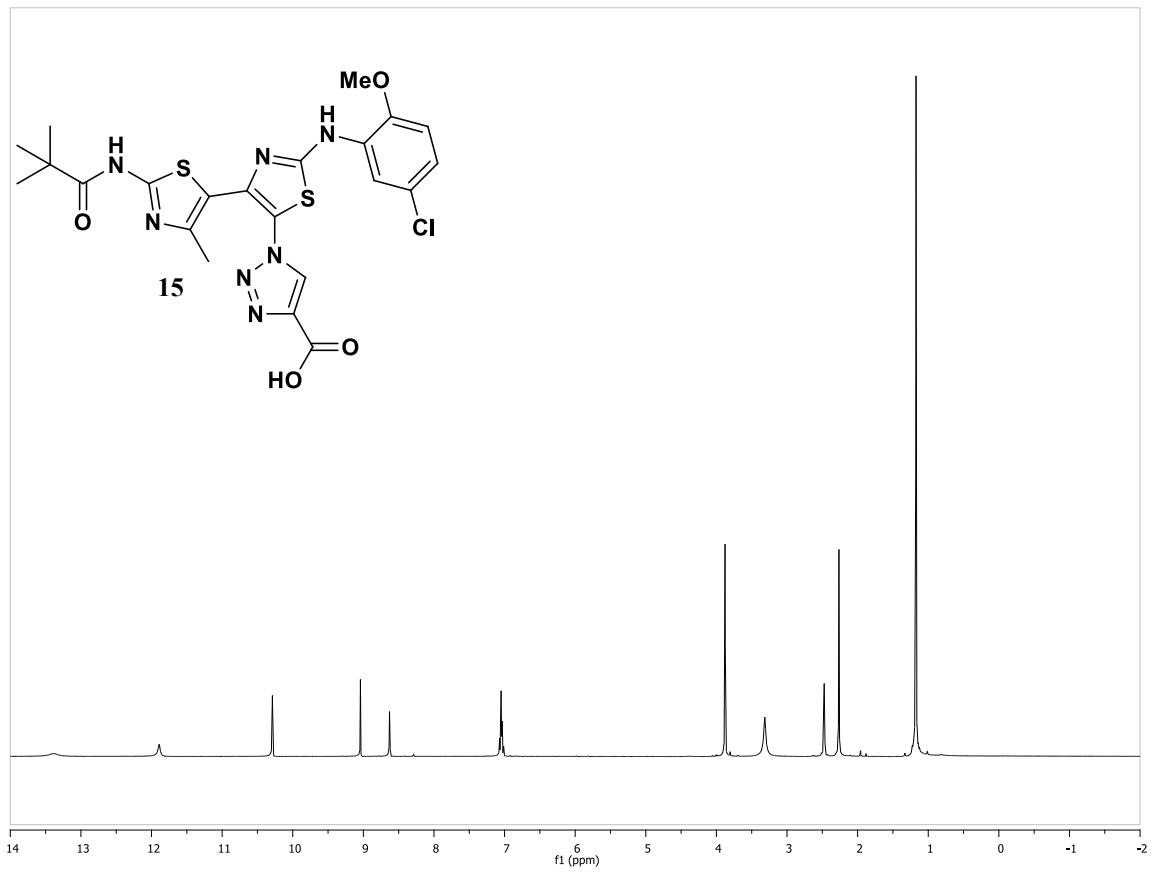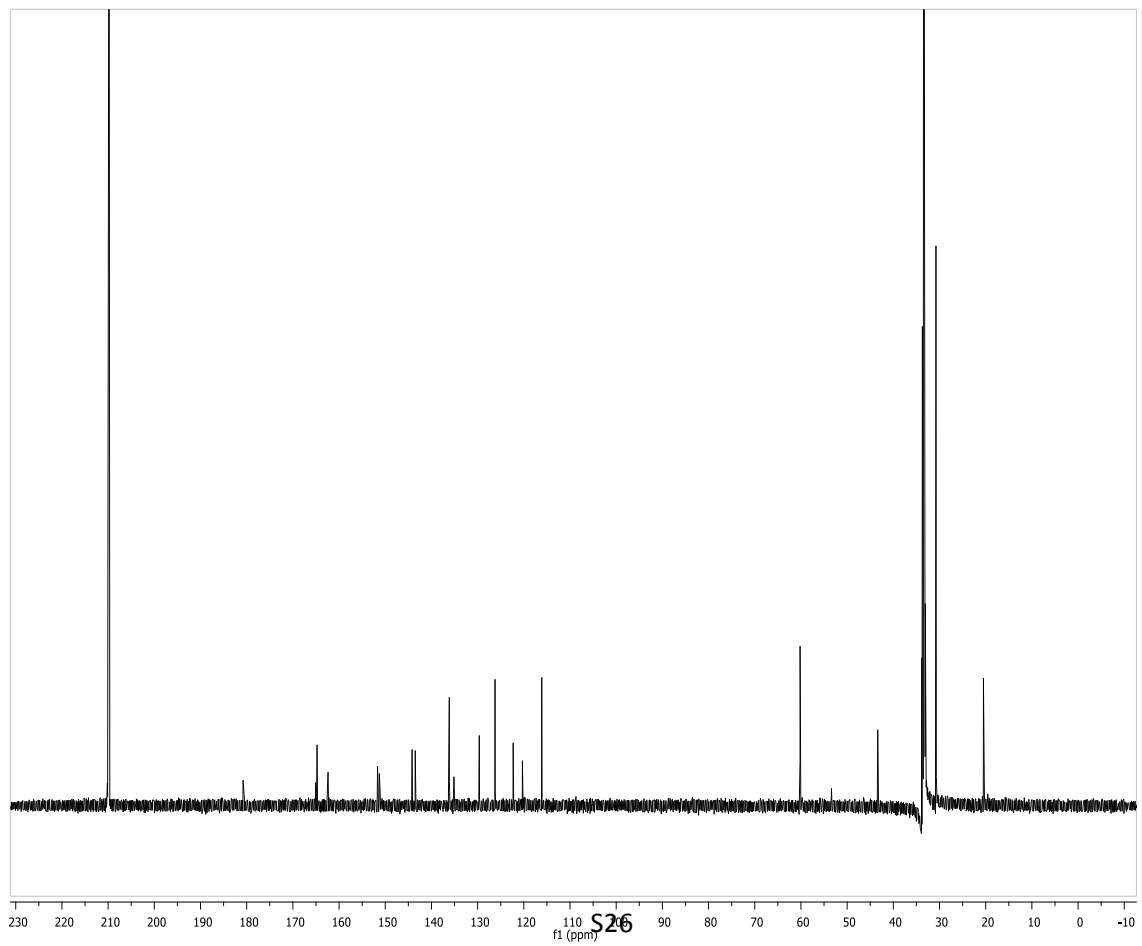

T: FTMS + p ESI Full ms [250.00-1800.00]

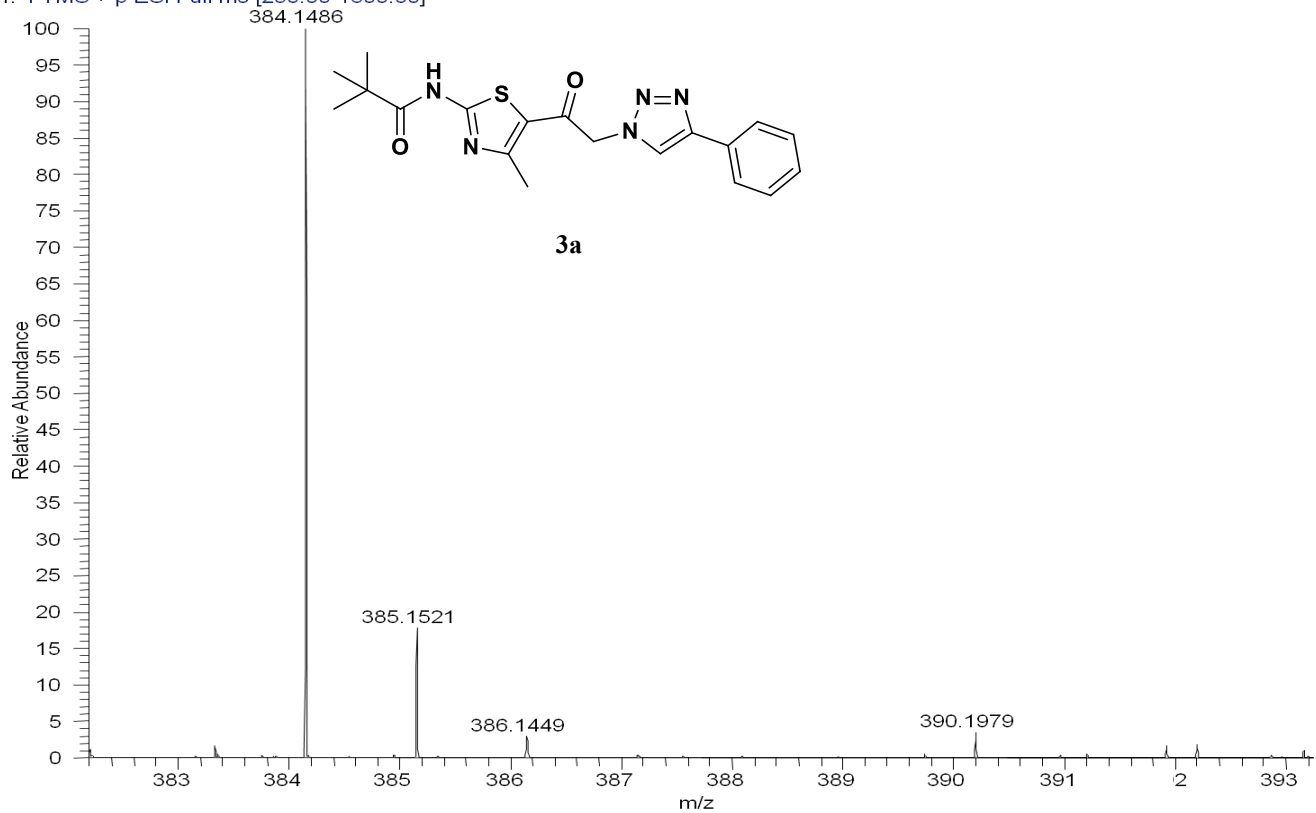

1: FTMS + p ESI Full MS (250.00-1800.00)

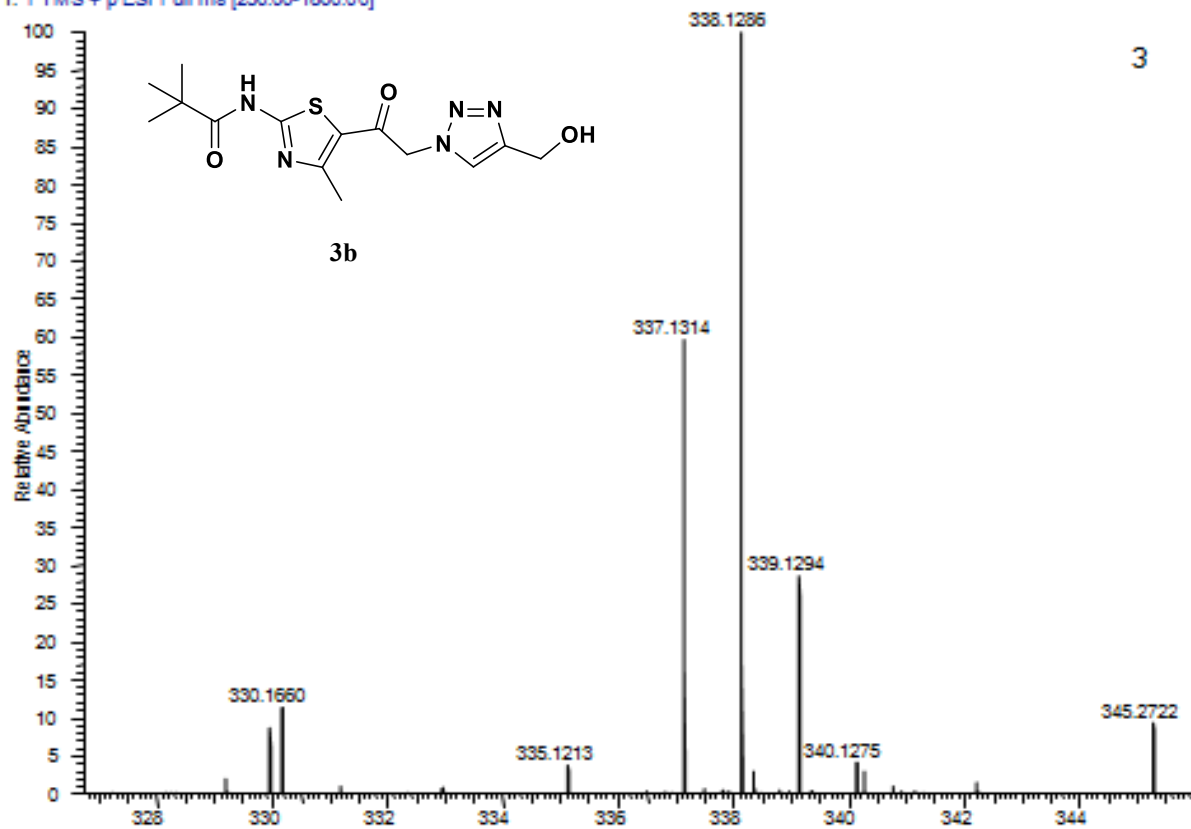

T: FTMS + p ESI Full ms [250.00-1800.00]

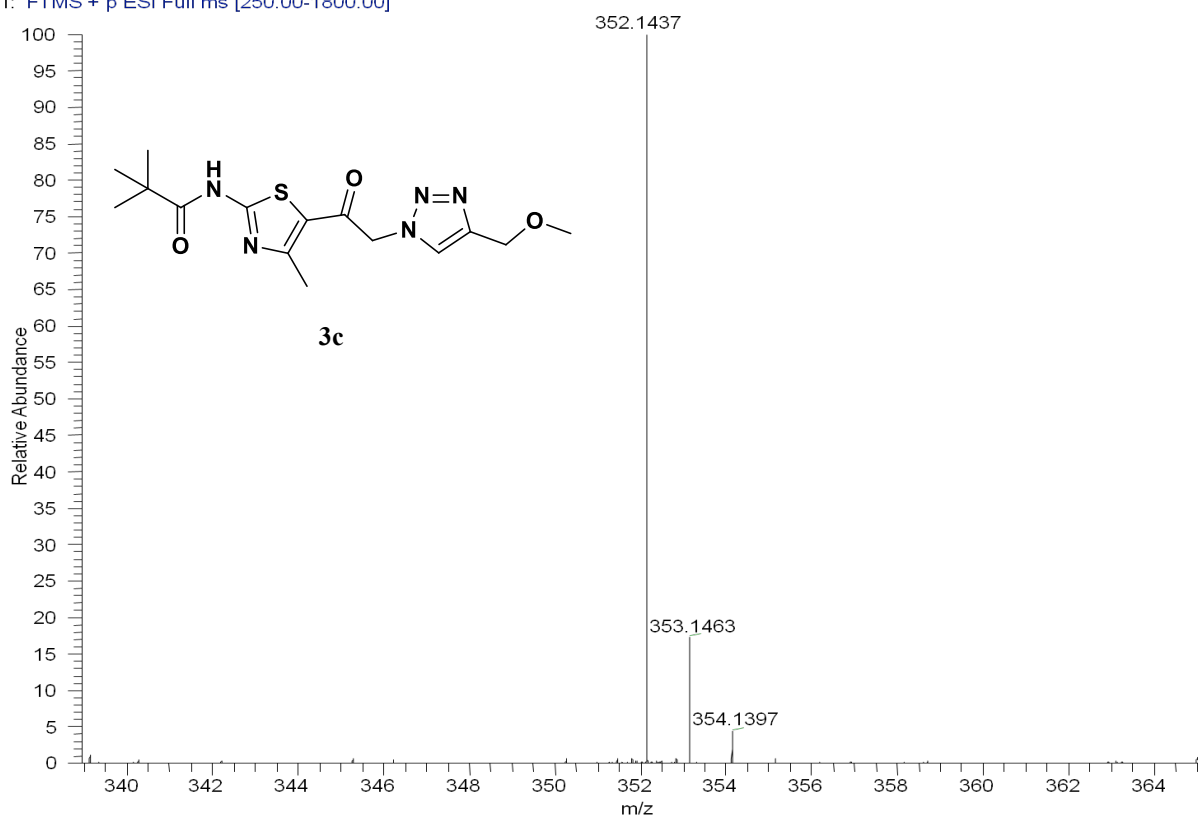

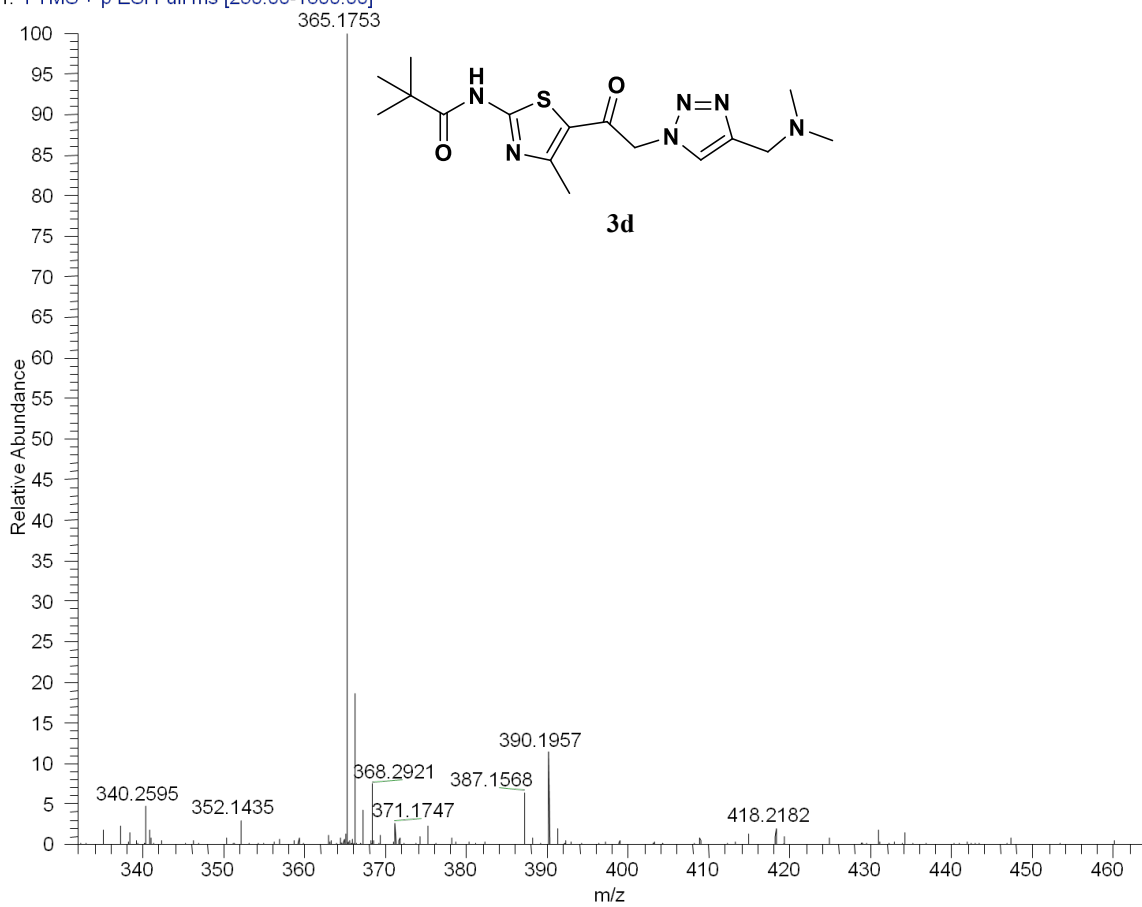

T: FTMS + p ESI Full ms [250.00-1800.00]

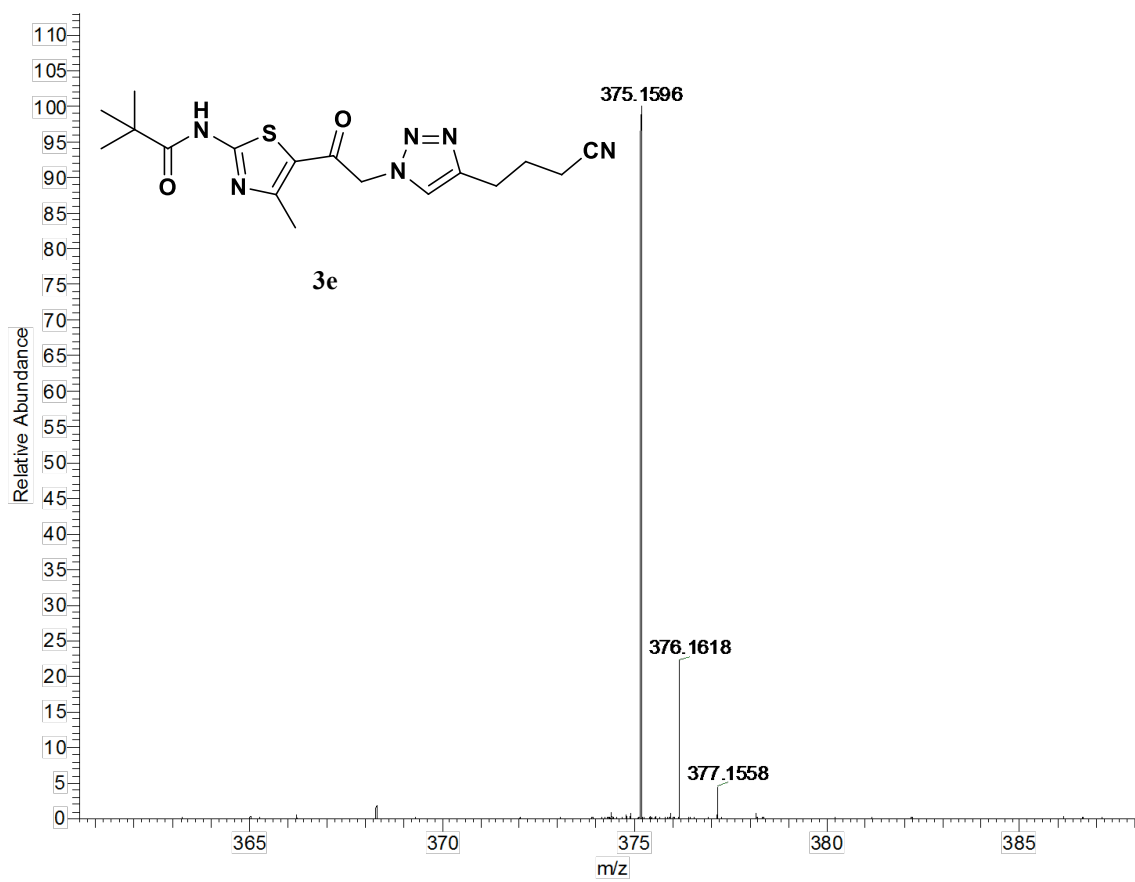

T: FTMS + p ESI Full ms [250.00-1800.00]

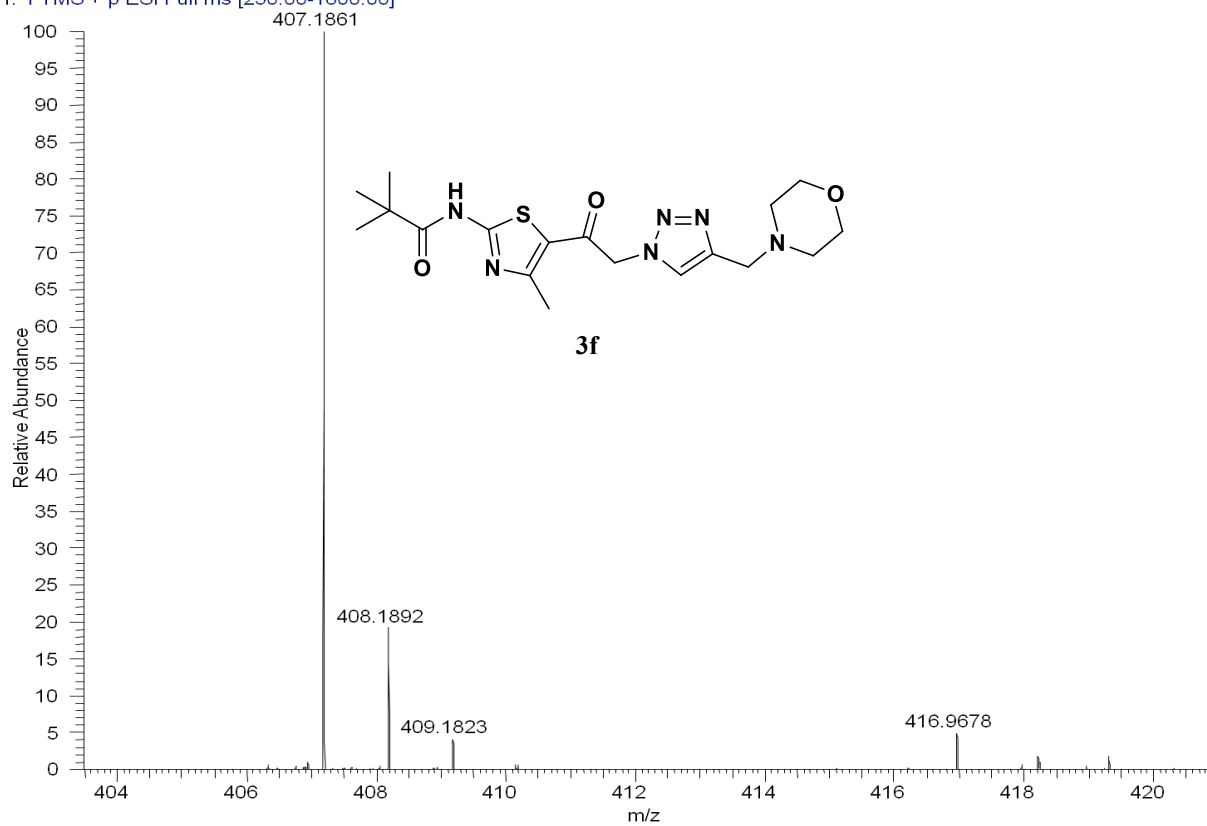



T: FTMS + p ESI Full ms [250.00-1800.00]

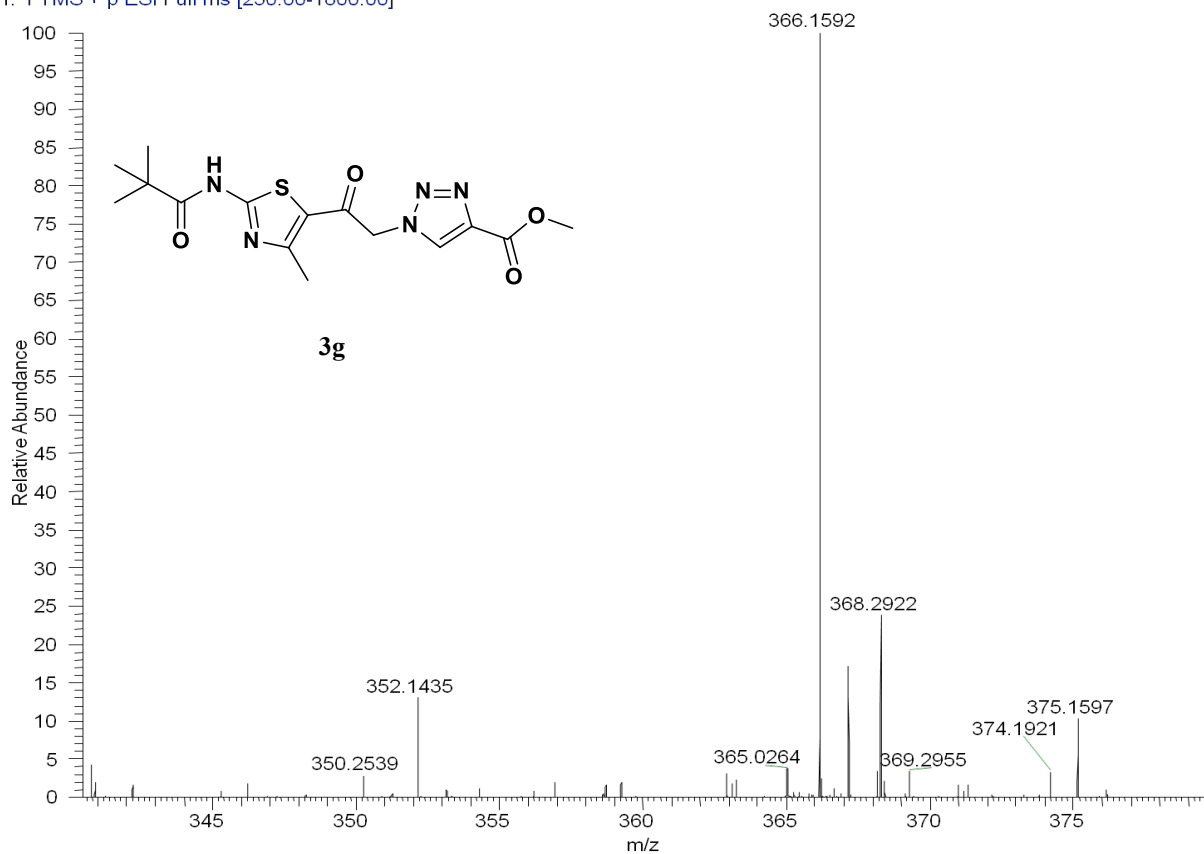

T: FTMS + p ESI Full ms [250.00-1800.00]

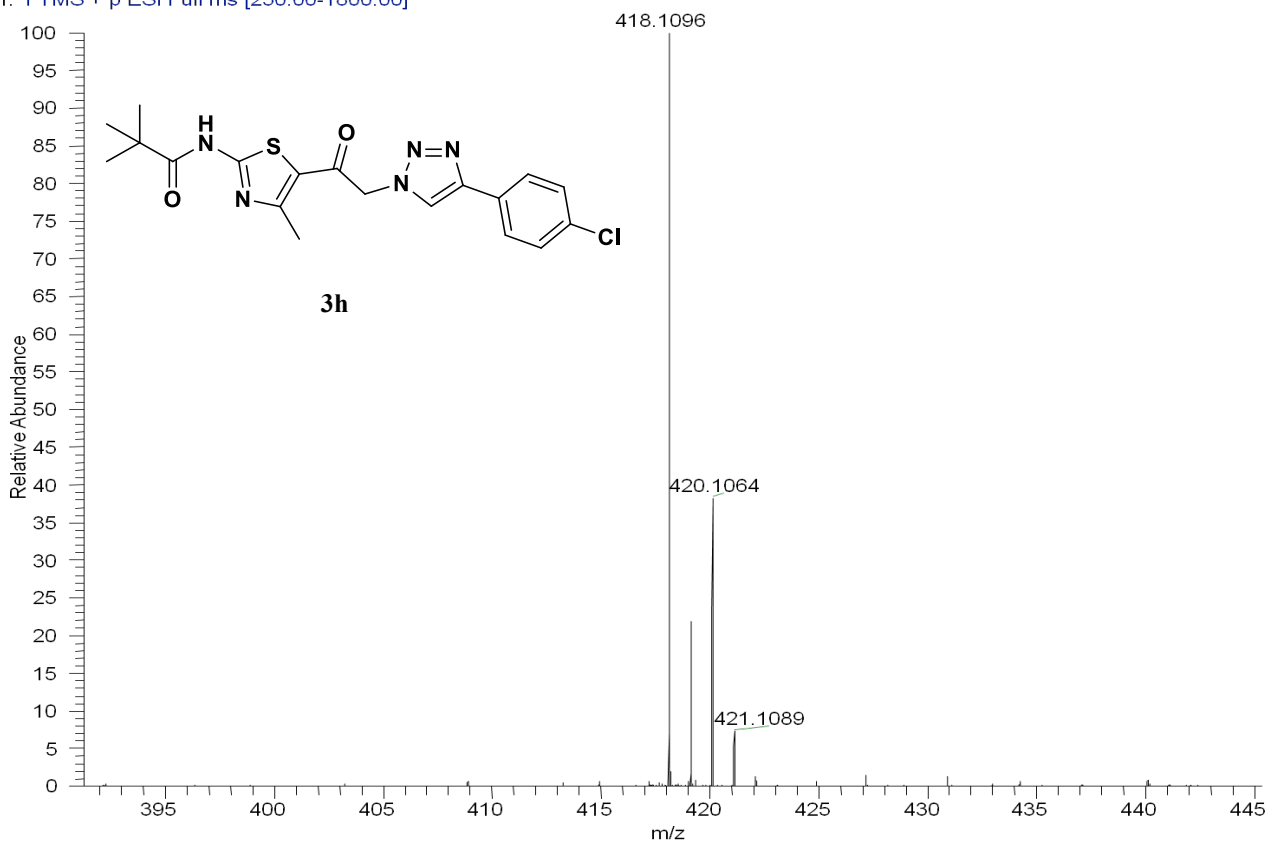

MR00 11/17/2016 10:17 AM EST/10/17/16 100 NEI 10220  
T: FTMS + p ESI Full ms [250.00-1800.00]

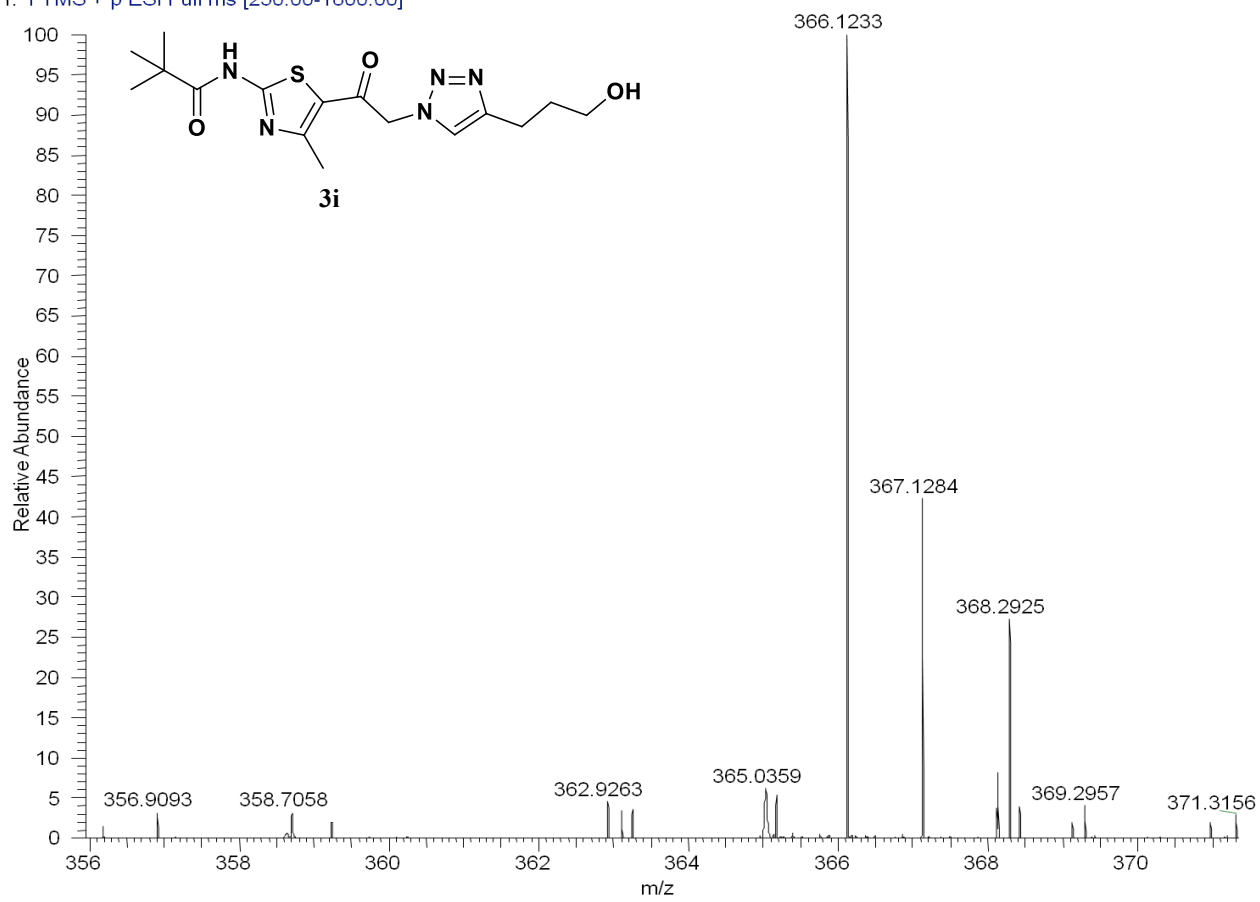

T: FTMS + c ESI Full ms [200.00-600.00]

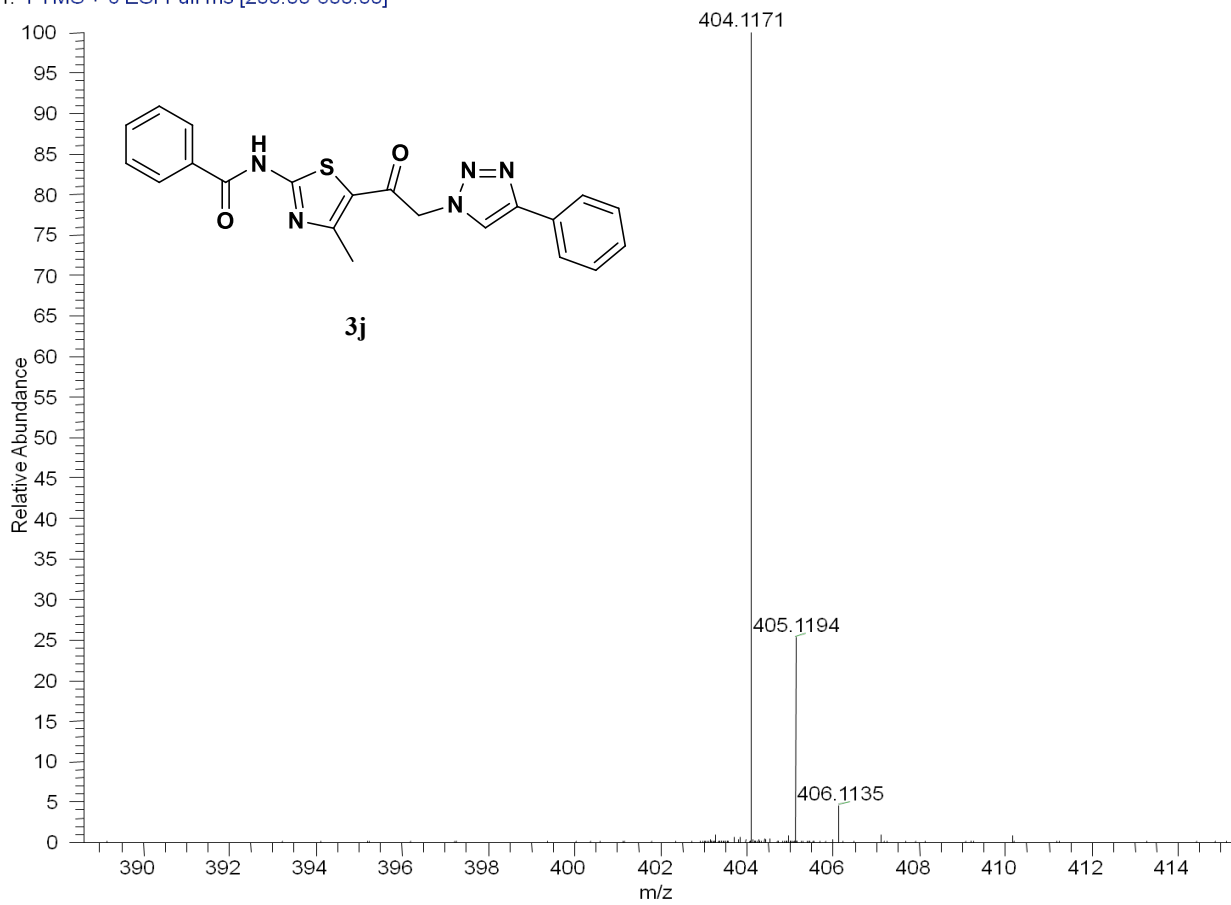

KMG\_9-22-11\_Kevin #257 RT: 3.04 AV: 1 NL: 7.74E7  
T: FTMS + c ESI Full ms [200.00-600.00]

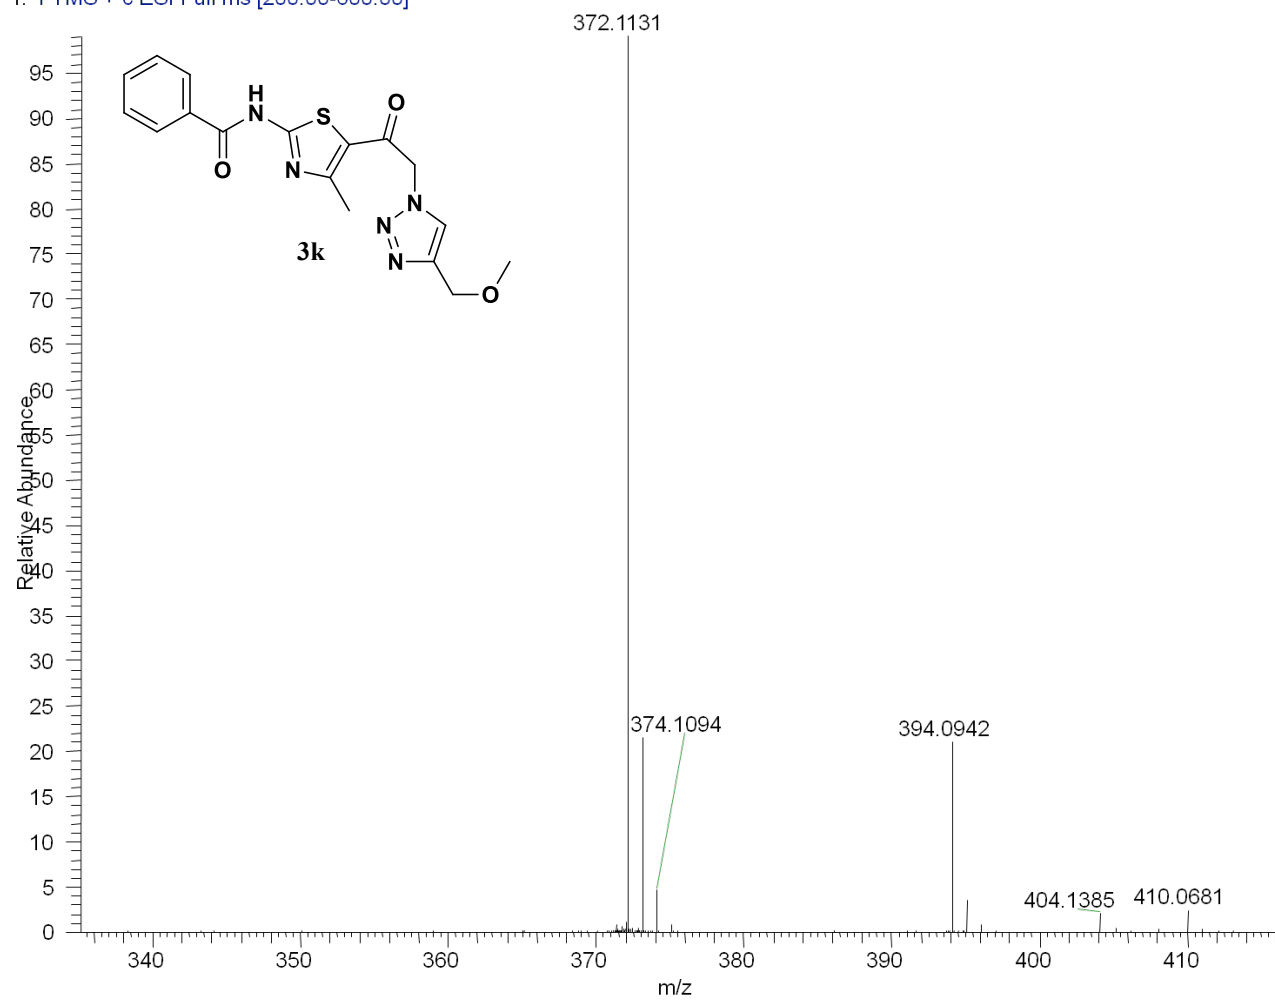

T: FTMS + c ESI Full ms [200.00-600.00]

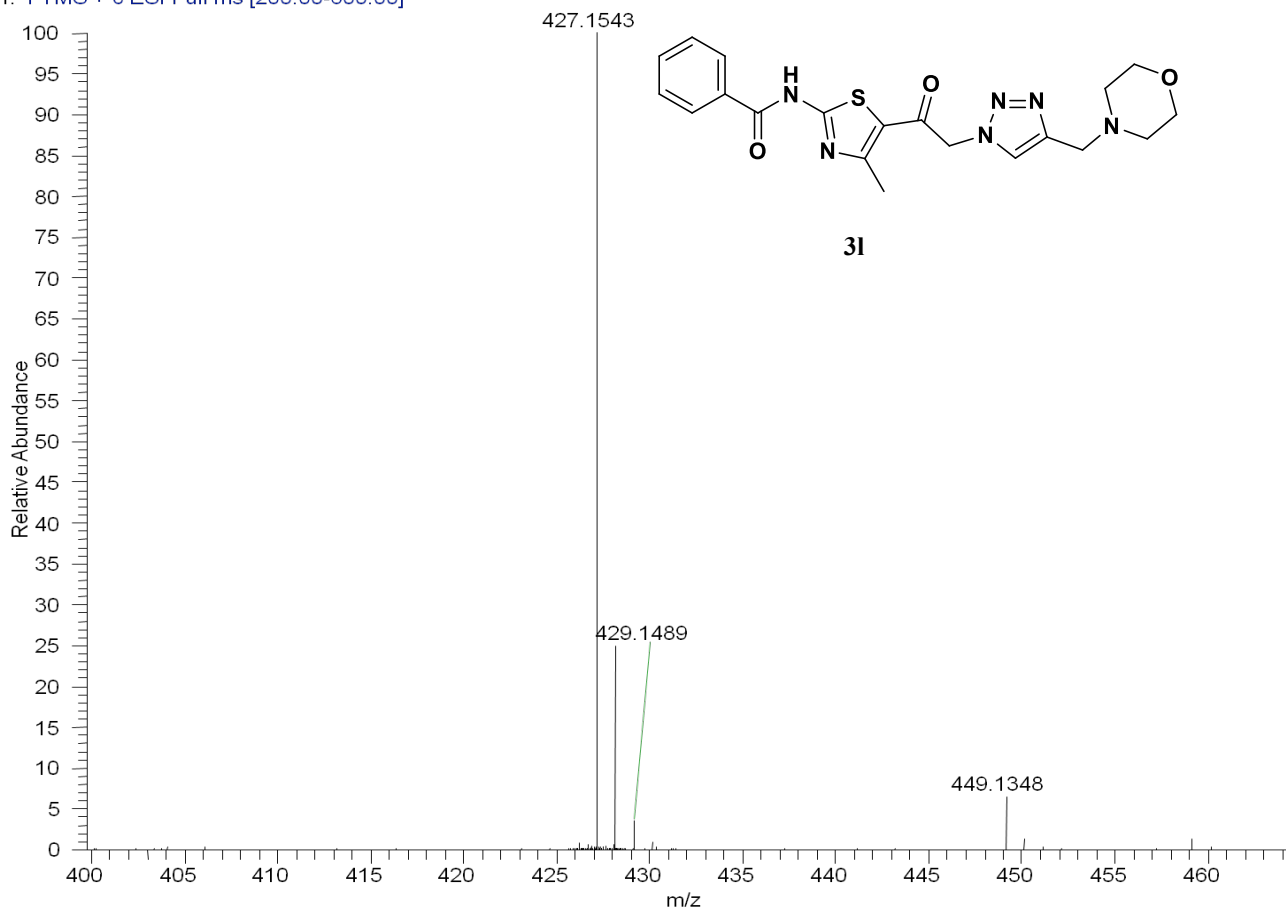

Mike\_Samples\_3-1-12#558-577 RT: 6.79-7.04 AV: 20 NL: 4.86E6  
T: FTMS + c ESI Full ms [150.00-400.00]

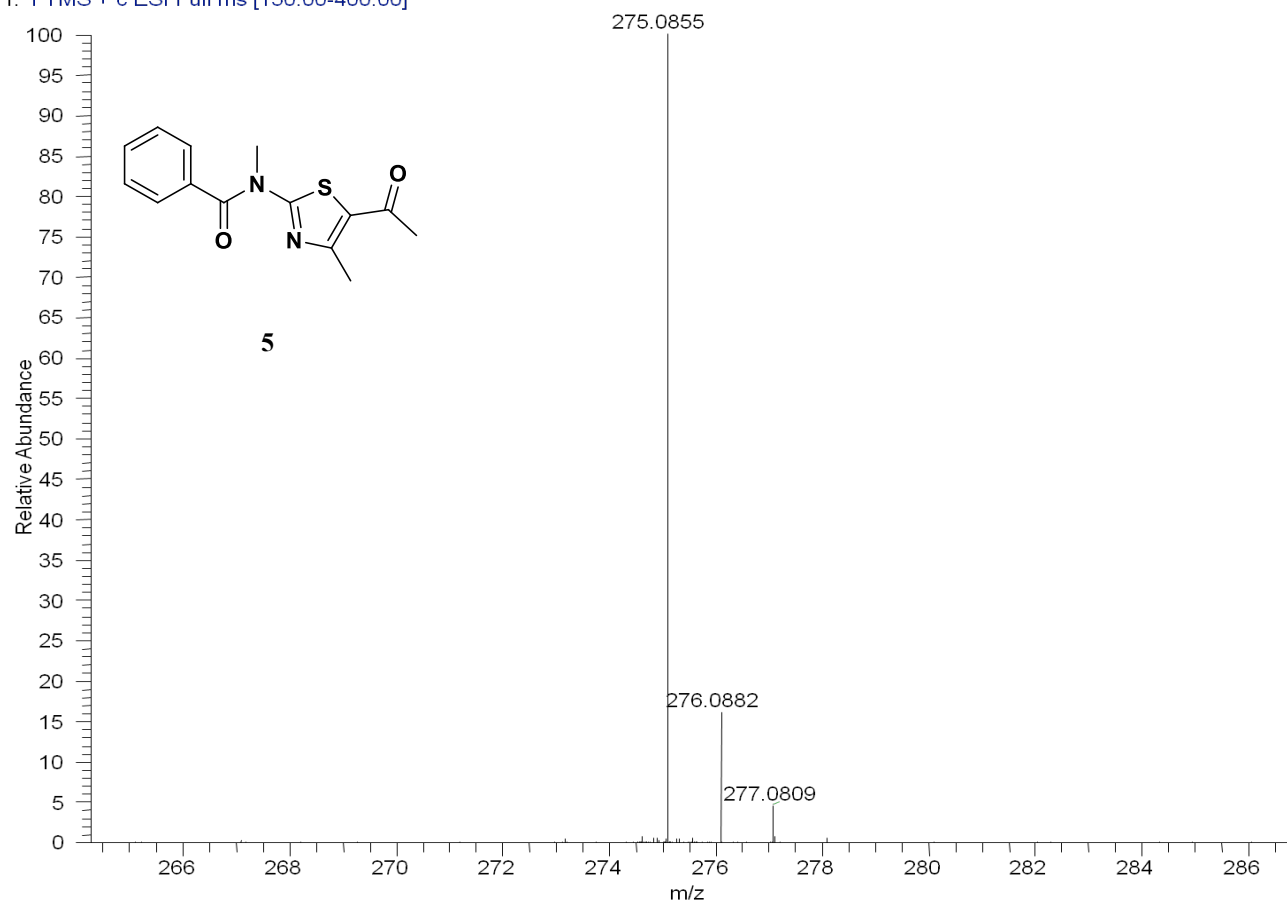

T: FTMS + c ESI Full ms [50.00-600.00]

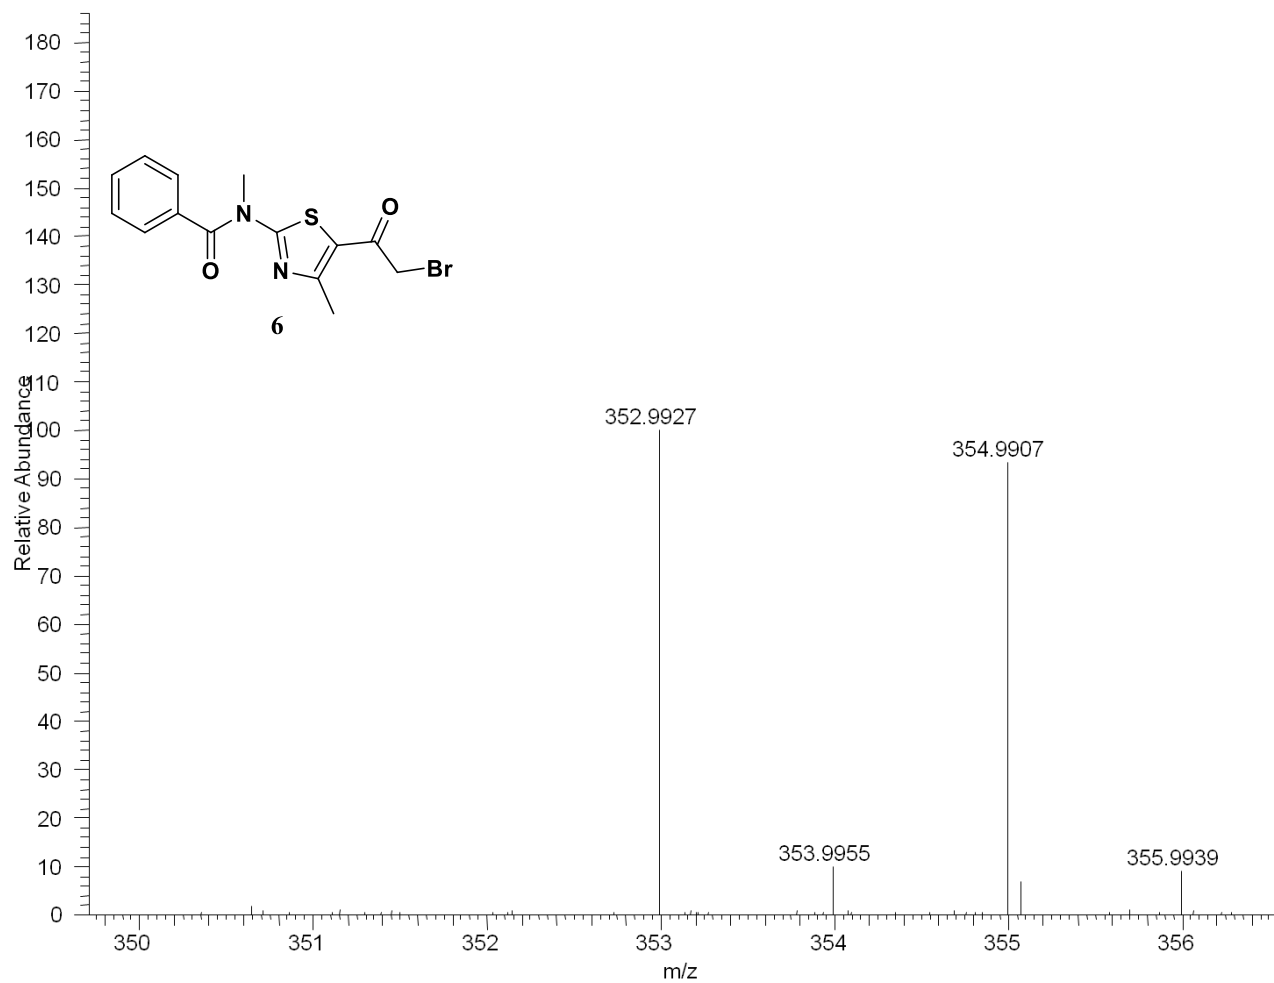



T: FTMS + c ESI Full ms [50.00-600.00]

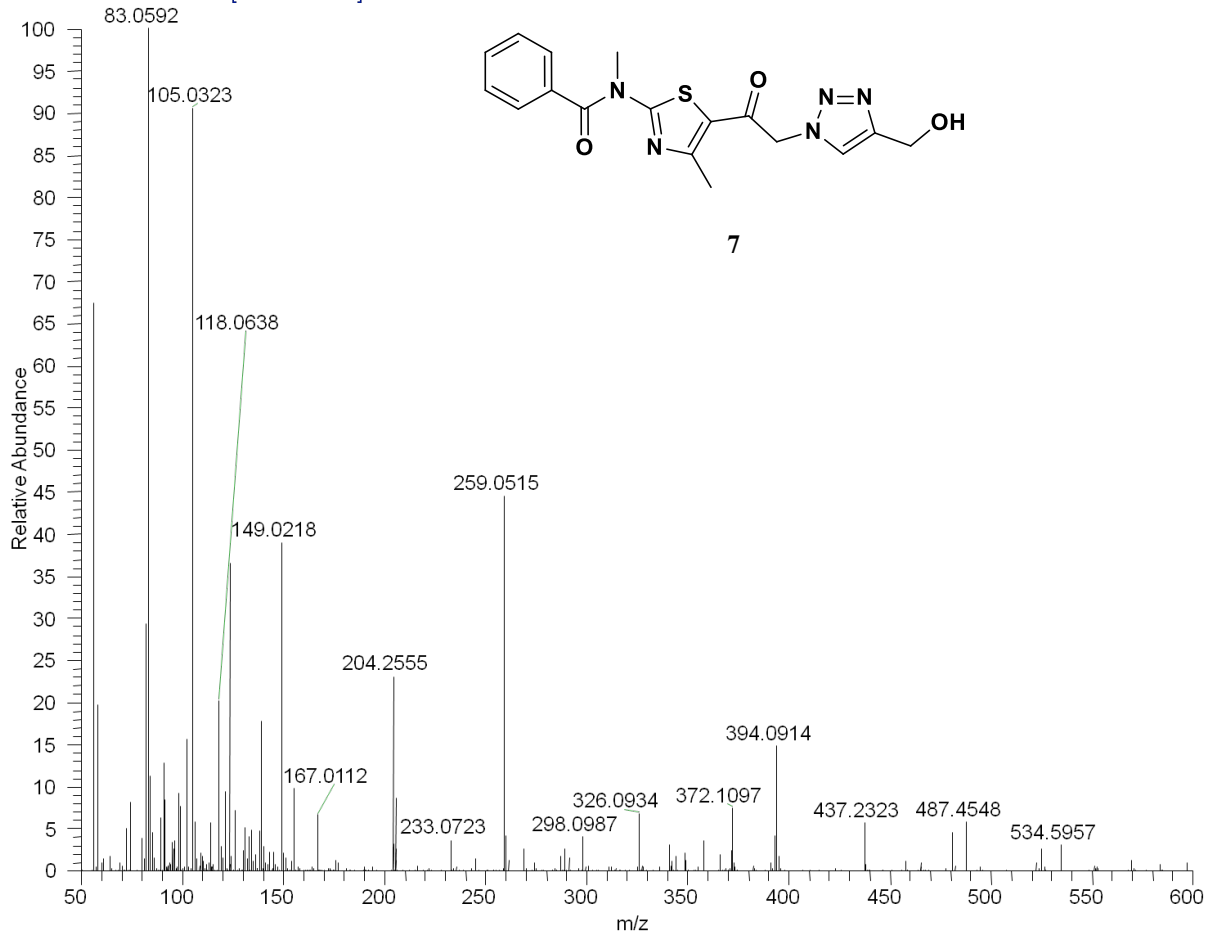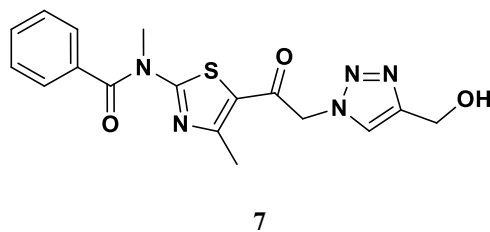

T: FTMS + c ESI Full ms [50.00-600.00]

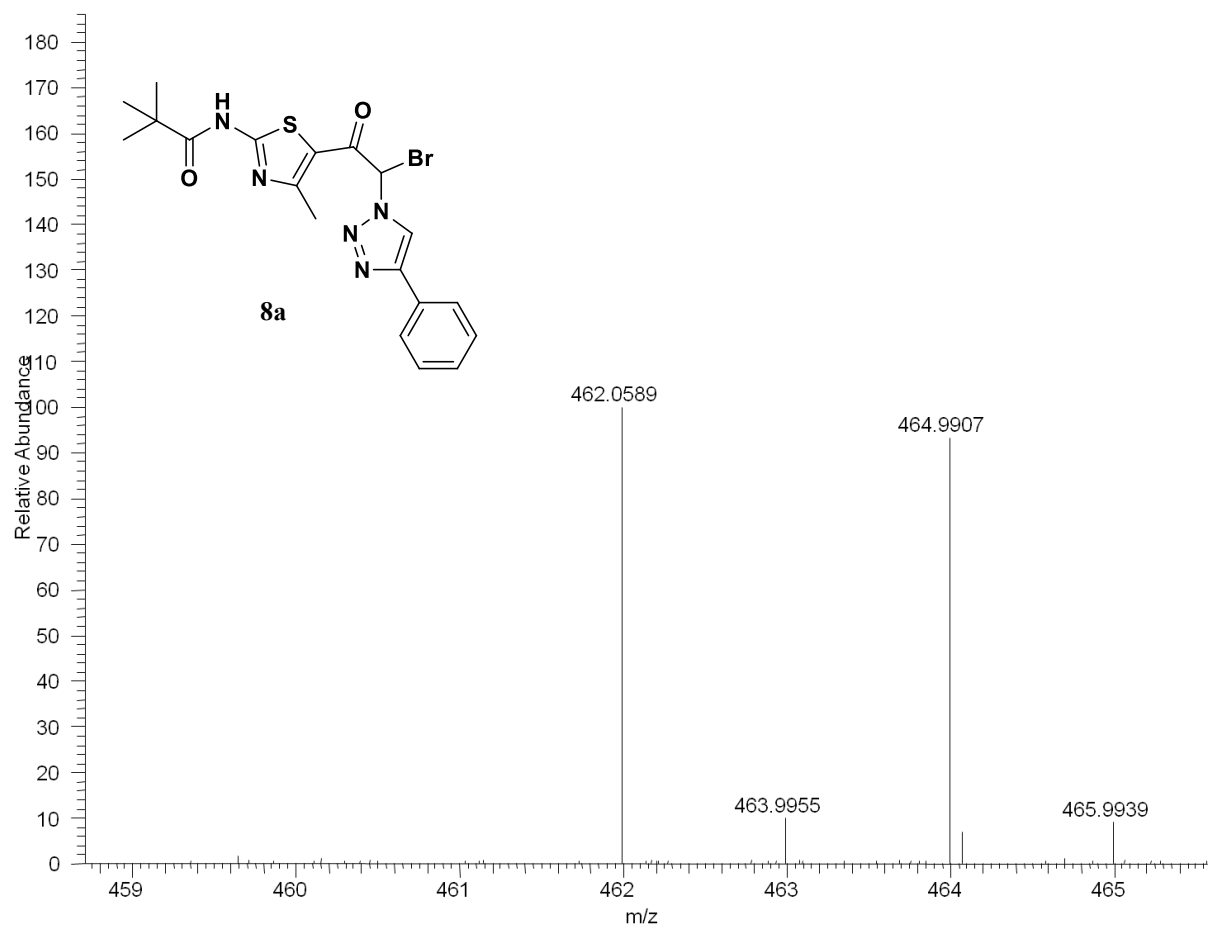

T: FTMS + c ESI Full ms [50.00-600.00]

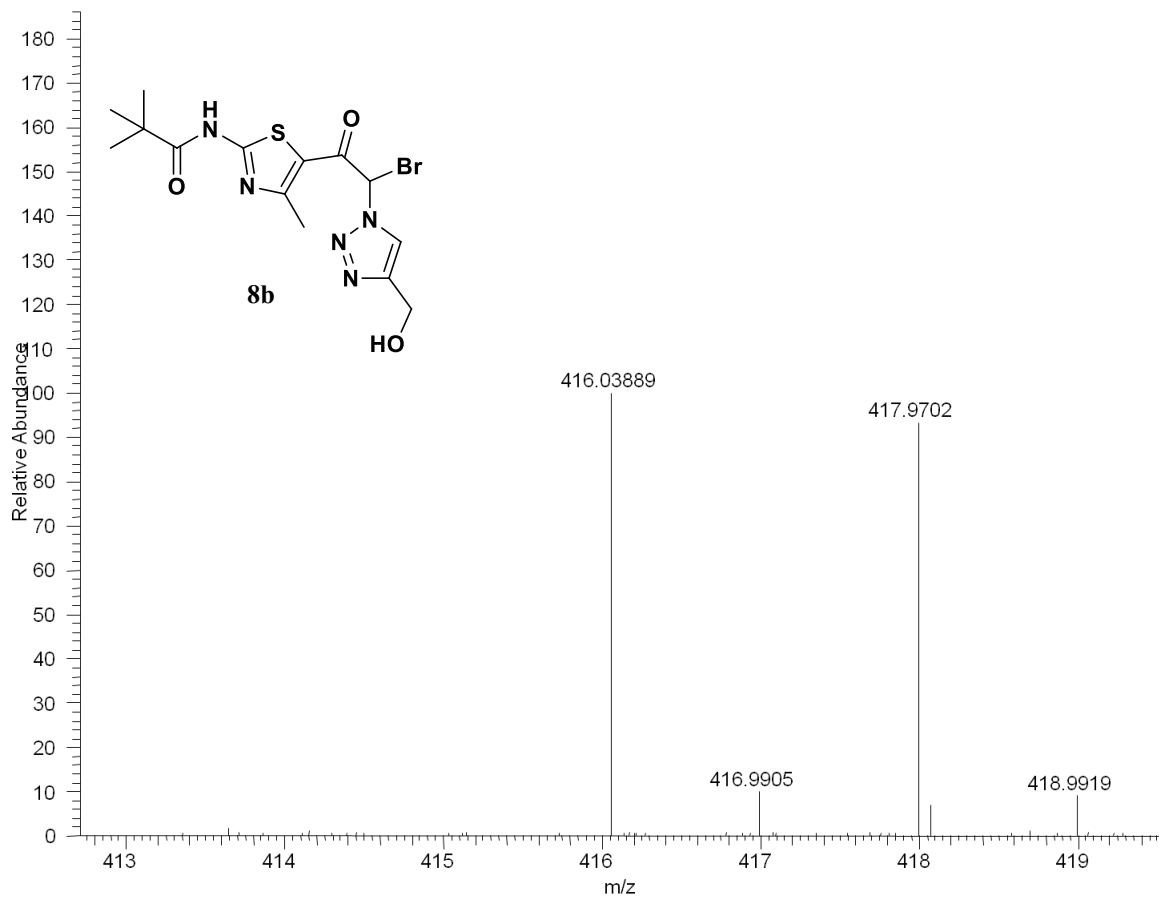

T: FTMS + c ESI Full ms [50.00-600.00]

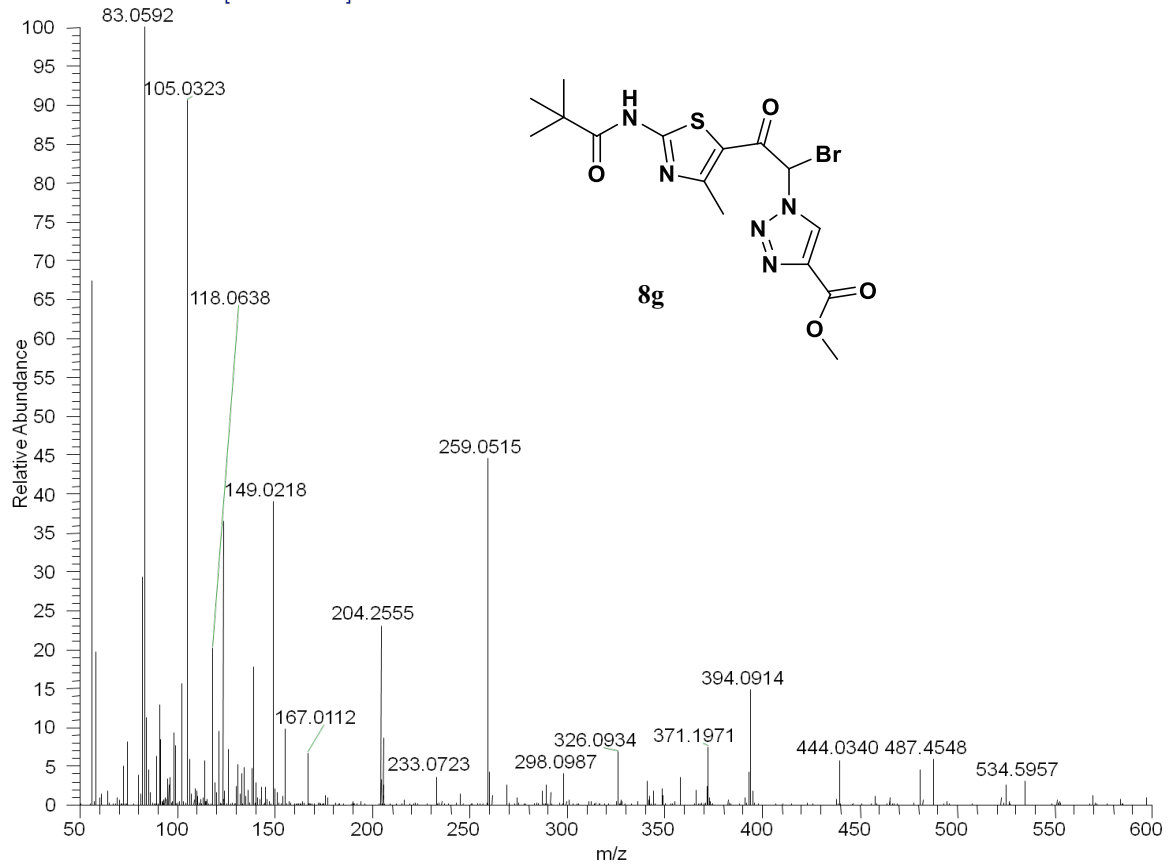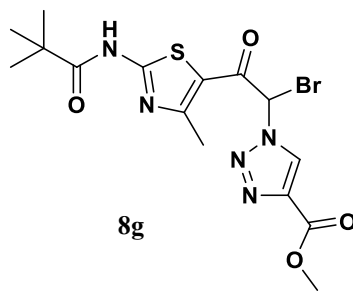

T: FTMS + p ESI Full ms [250.00-1800.00]

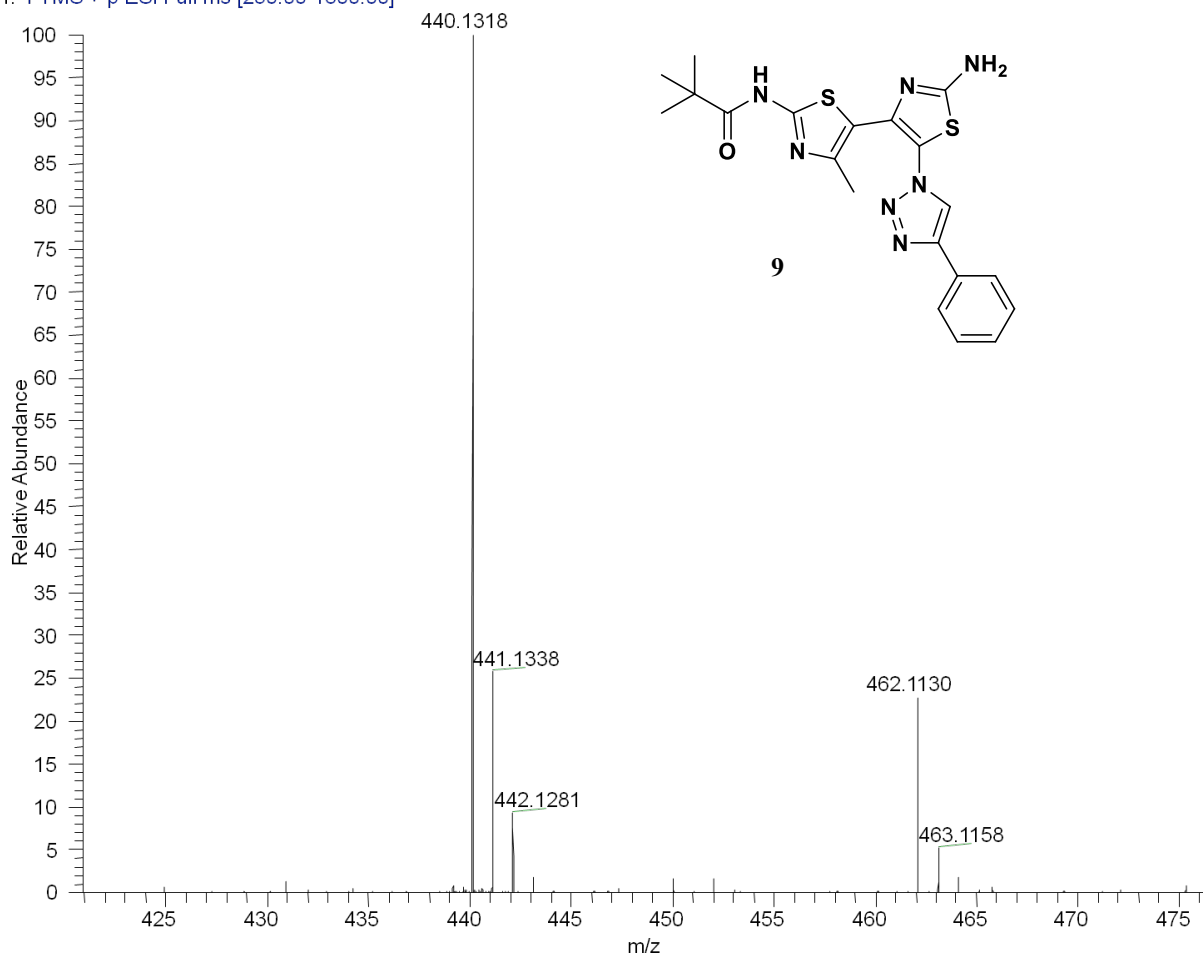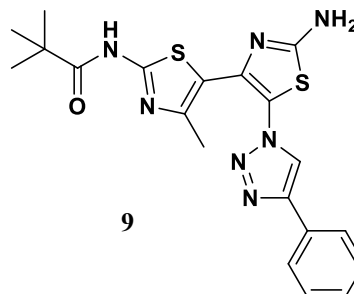

T: FTMS + p ESI Full ms [250.00-1800.00]

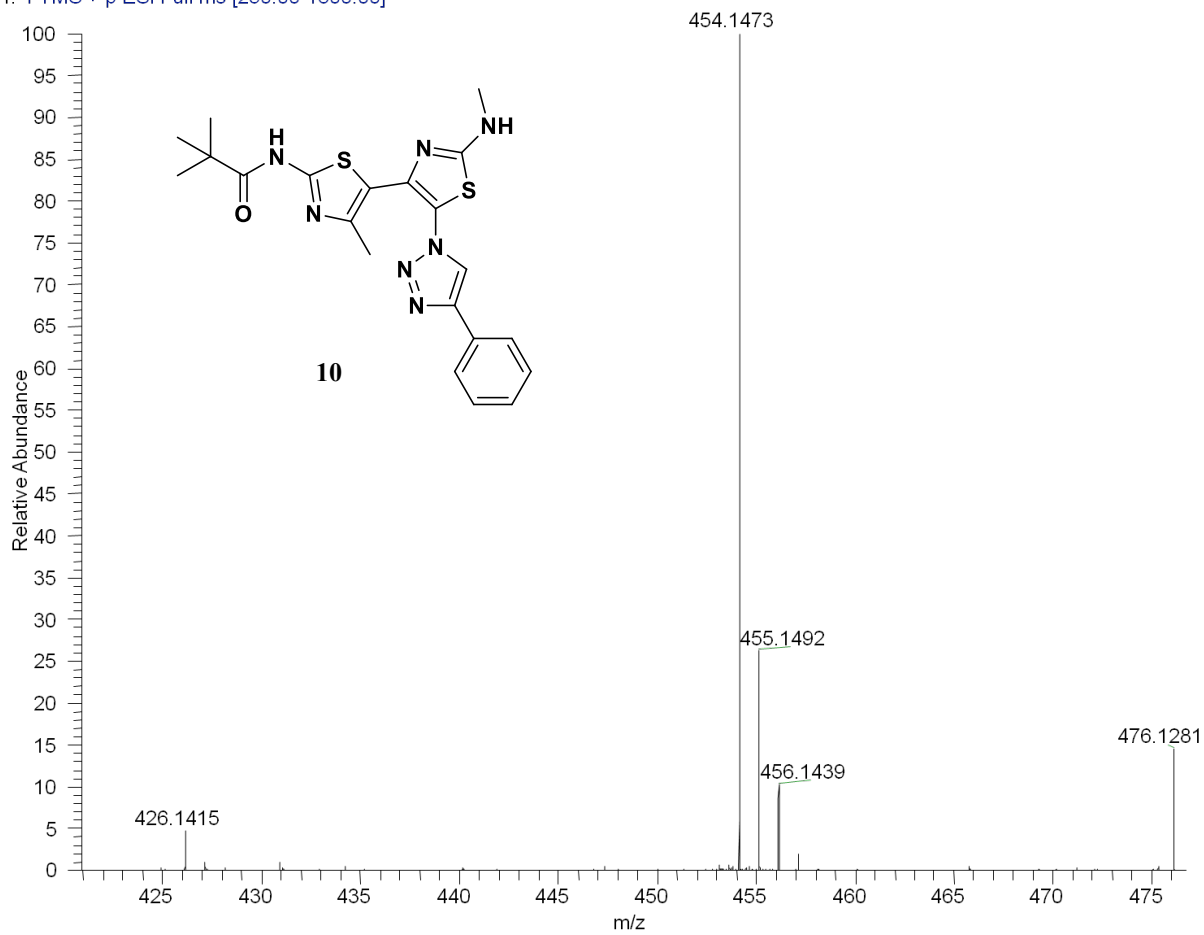

T: FTMS + p ESI Full ms [250.00-1800.00]

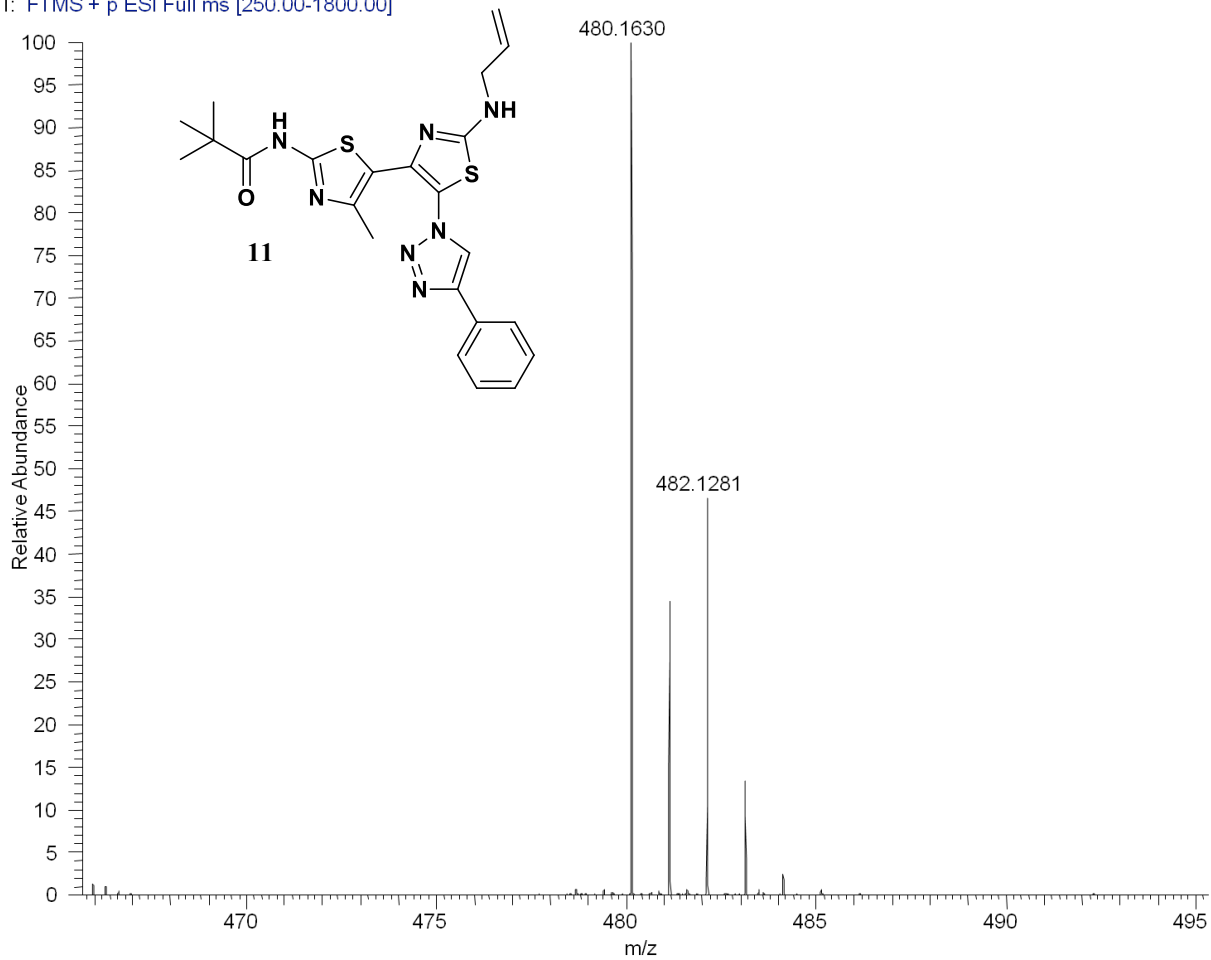

T: FTMS + p ESI Full ms [250.00-1800.00]

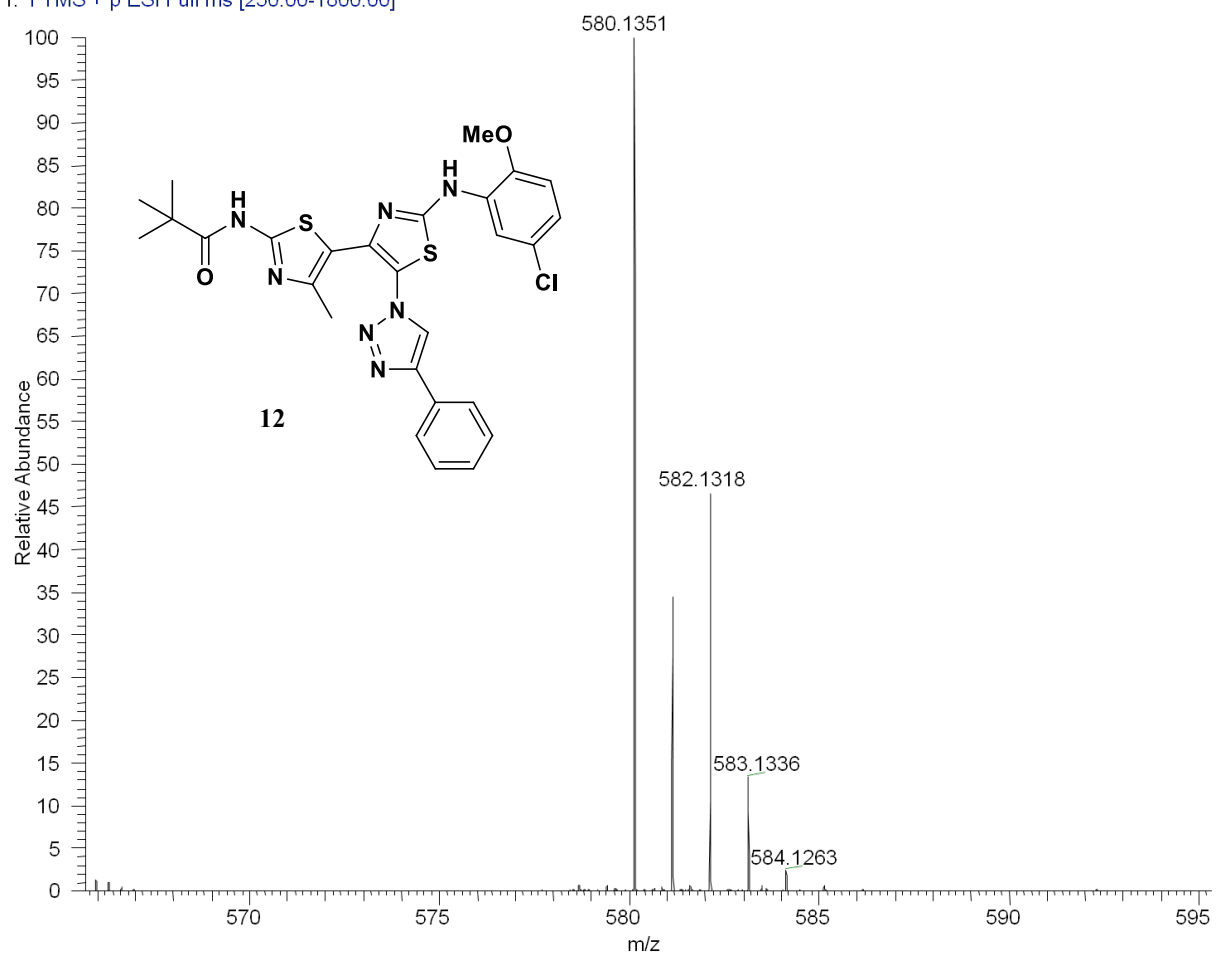



T: FTMS + p ESI Full ms [250.00-1800.00]

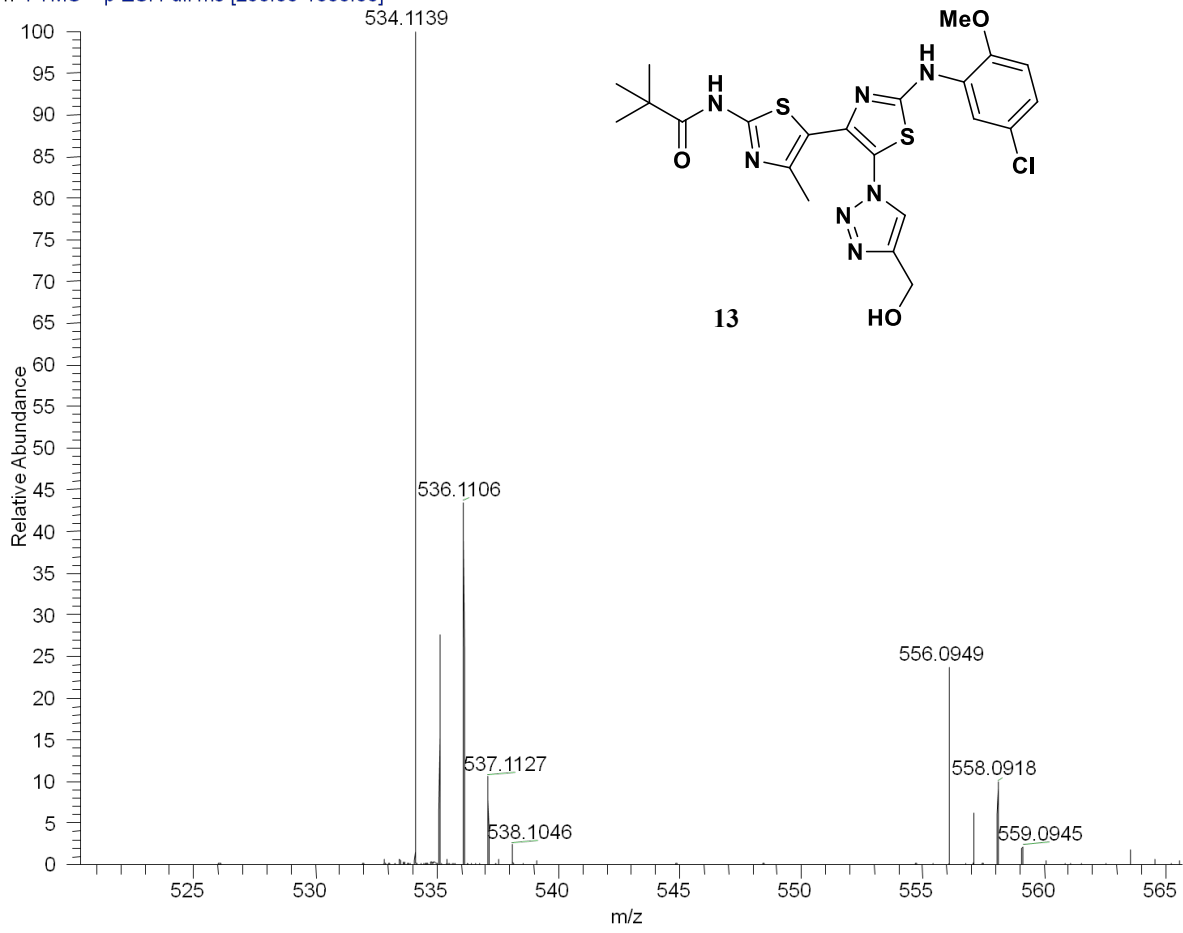

T: FTMS + p ESI Full ms [250.00-1800.00]

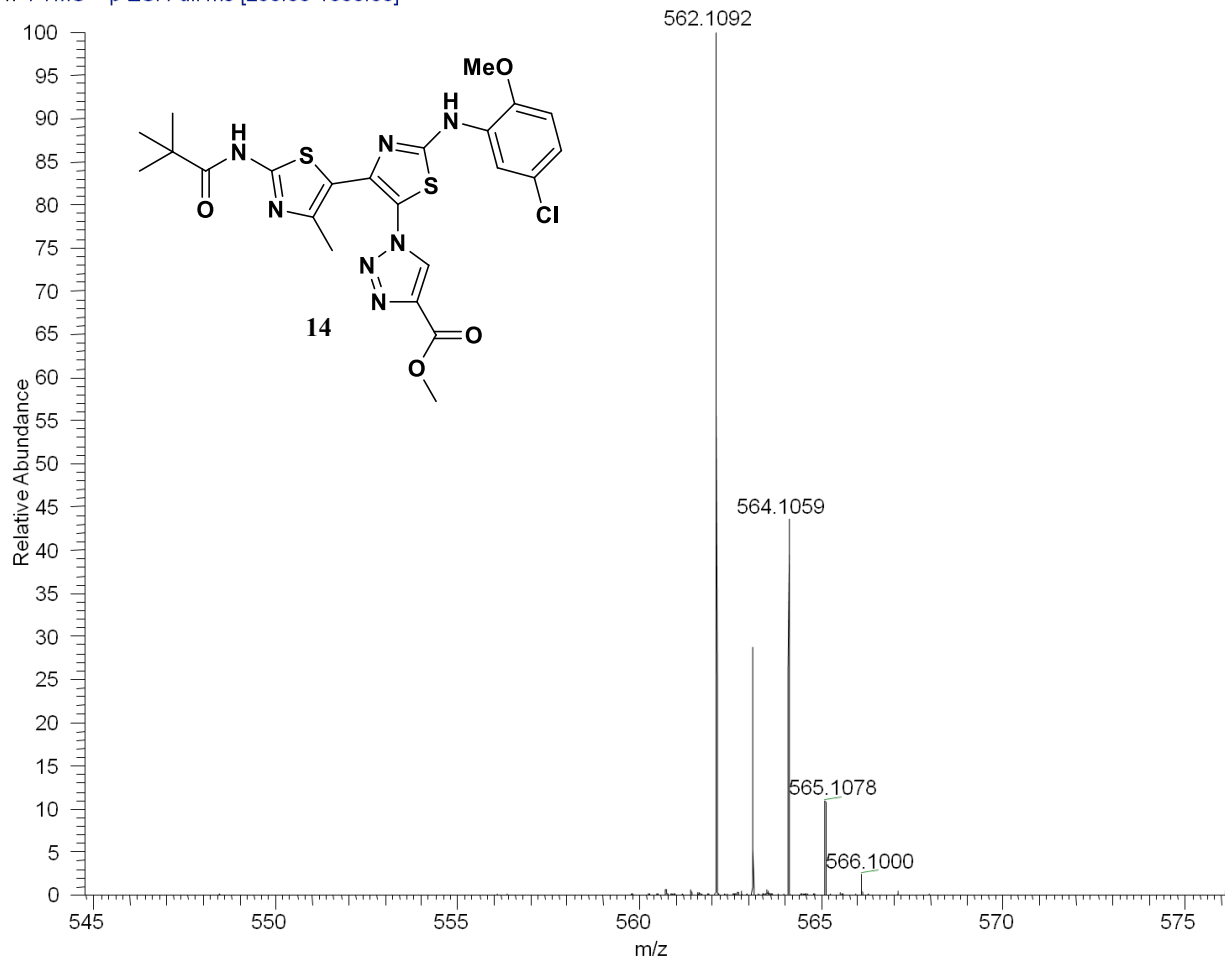

T: FTMS + p ESI Full ms [250.00-1800.00]

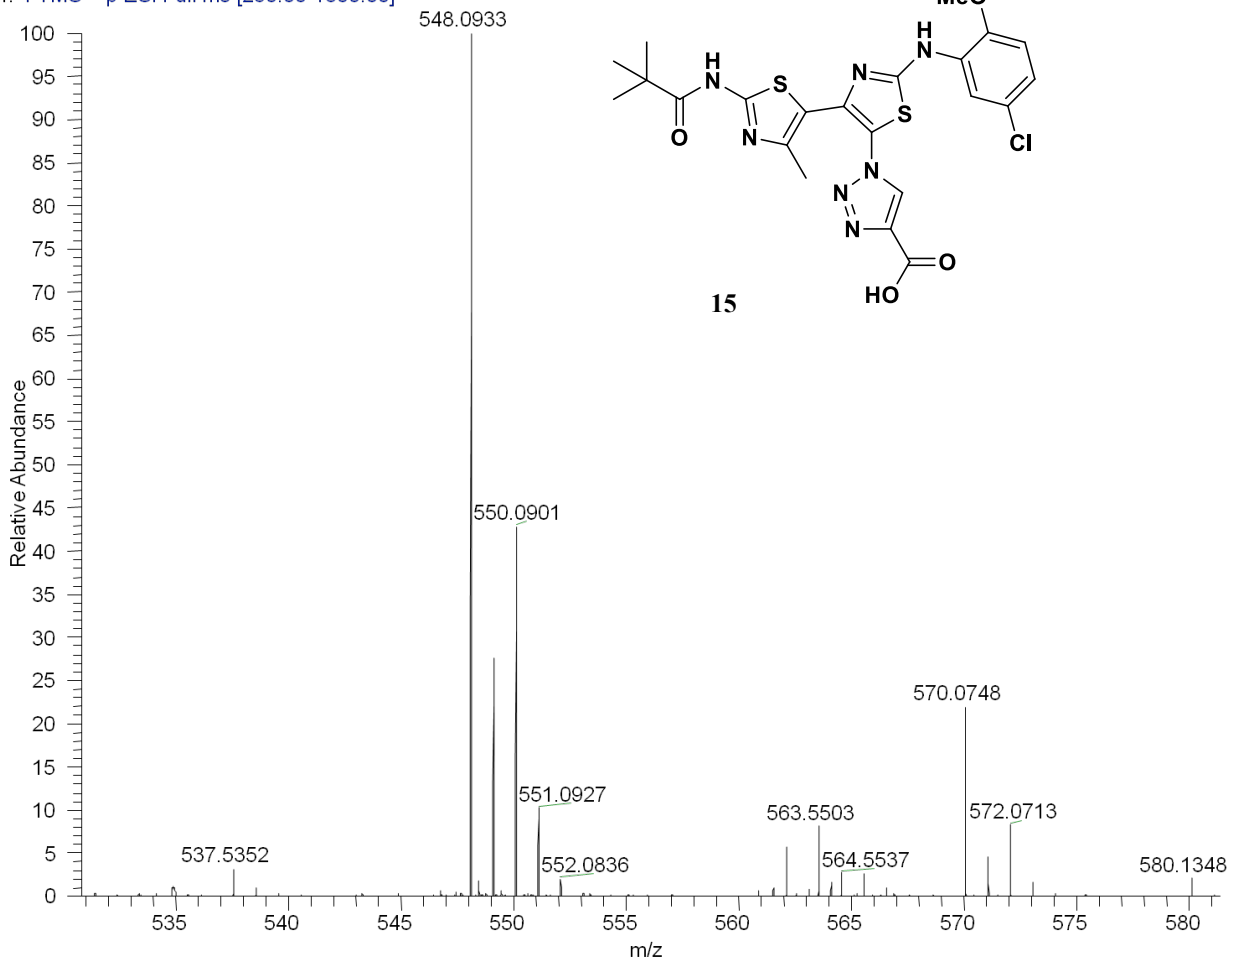

Supplement: NIHMS392664-supplement-01.pdf [file NIHMS392664-supplement-01.pdf]
